# Supplementary material for: Synthesis of acyl fluorides through deoxyfluorination of carboxylic acids
Source: Royal Society of Chemistry journal article supplement (doi:10.1039/d3ob01557b), 2023-01-01

# Electronic Supplementary Information

## Facile synthesis of acyl fluorides through deoxyfluorination of carboxylic acids

Mengjie Cen, Xi Yang, Shanshan Zhang, Liguang Gan, Long Liu\*, and Tieqiao Chen\*

Key Laboratory of Ministry of Education for Advanced Materials in Tropical Island Resources,  
Hainan Provincial Key Lab of Fine Chem, Hainan Provincial Fine Chemical Engineering Research  
Center, Hainan University, Haikou, 570228, China.

E-mail: [hainanliulong@hainanu.edu.cn](mailto:hainanliulong@hainanu.edu.cn); [chentieqiao@hnu.edu.cn](mailto:chentieqiao@hnu.edu.cn)

### Table of contents

|                                                                                                                                 |                 |
|---------------------------------------------------------------------------------------------------------------------------------|-----------------|
| <b>1. General Information</b>                                                                                                   | <b>S2</b>       |
| <b>2. Optimization of Reaction Conditions</b>                                                                                   | <b>S3</b>       |
| <b>3. Characterization Data for the Products</b>                                                                                | <b>S4-S10</b>   |
| <b>4. References</b>                                                                                                            | <b>S11</b>      |
| <b>5. Copies of <math>^1\text{H}</math>, <math>^{13}\text{C}</math>, <math>^{19}\text{F}</math> NMR Spectra of the Products</b> | <b>S12-S95</b>  |
| <b>6. Copies of Infrared spectrum of the Products</b>                                                                           | <b>S96-S108</b> |

## 1. General Information

The reactions were carried out in Schlenk tubes under N<sub>2</sub> atmosphere. For reactions that required heating, a heating mantle was used as the heat source. All solvents and reagents were purchased from Tansoole, Meryer, Heowns, Energy Chemical, Alfa Aesar, and Aladdin. Solvents were purified according to standard operation procedures and reagents were used as received unless otherwise noted. The absorbent materials like KF are stored in the glove box after purchase without any special treatment. Column chromatography was performed using Silica Gel 60 (300-400 mesh). The reactions were monitored by GC and GC-MS; GC-MS results were recorded on a GC-MS QP2010 instrument, and GC analysis was performed on a GC 2014 instrument. The <sup>1</sup>H, <sup>13</sup>C, and <sup>19</sup>F NMR spectra were recorded on a Bruker ADVANCE III spectrometer at 400, 100, and 376 MHz. HRMS were recorded on a LCMS-IT-TOF instrument by the ESI or APCI technique. Infrared spectrum was recorded on a Nicolet 6700 spectrometer.

## 2. Optimization of Reaction Conditions

Table S1 Reaction Optimization

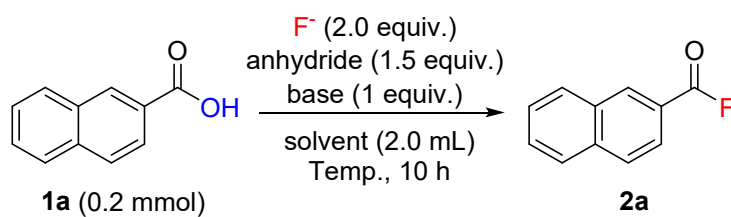

| entry | base                           |        | anhydride          |         | F <sup>-</sup> |         | solvent | Temp.  | yield |
|-------|--------------------------------|--------|--------------------|---------|----------------|---------|---------|--------|-------|
| 1     | NaHCO <sub>3</sub>             | 1 eq.  | TFAA               | 1.5 eq. | KF             | 2.0 eq. | DME     | 100 °C | 26%   |
| 2     | KHCO <sub>3</sub>              | 1 eq.  | TFAA               | 1.5 eq. | KF             | 2.0 eq. | DME     | 100 °C | 22%   |
| 3     | K <sub>2</sub> CO <sub>3</sub> | 1 eq.  | TFAA               | 1.5 eq. | KF             | 2.0 eq. | DME     | 100 °C | 22%   |
| 4     | Et <sub>3</sub> N              | 1 eq.  | TFAA               | 1.5 eq. | KF             | 2.0 eq. | DME     | 100 °C | 84%   |
| 5     | DPIEA                          | 1 eq.  | TFAA               | 1.5 eq. | KF             | 2.0 eq. | DME     | 100 °C | 23%   |
| 6     | DBU                            | 1 eq.  | TFAA               | 1.5 eq. | KF             | 2.0 eq. | DME     | 100 °C | 20%   |
| 7     | DMAP                           | 1 eq.  | TFAA               | 1.5 eq. | KF             | 2.0 eq. | DME     | 100 °C | 44%   |
| 8     | Et <sub>3</sub> N              | 0.5 eq | TFAA               | 1.5 eq. | KF             | 2.0 eq. | DME     | 100 °C | 86%   |
| 9     | Et <sub>3</sub> N              | none   | TFAA               | 1.5 eq. | KF             | 2.0 eq. | DME     | 100 °C | 35%   |
| 10    | Et <sub>3</sub> N              | 0.5 eq | Ac <sub>2</sub> O  | 1.5 eq. | KF             | 2.0 eq. | DME     | 100 °C | Trace |
| 11    | Et <sub>3</sub> N              | 0.5 eq | Piv <sub>2</sub> O | 1.5 eq. | KF             | 2.0 eq. | DME     | 100 °C | 42%   |
| 12    | Et <sub>3</sub> N              | 0.5 eq | Boc <sub>2</sub> O | 1.5 eq. | KF             | 2.0 eq. | DME     | 100 °C | 4%    |
| 13    | Et <sub>3</sub> N              | 0.5 eq | TFAA               | 1.2 eq. | KF             | 2.0 eq. | DME     | 100 °C | 67%   |
| 14    | Et <sub>3</sub> N              | 0.5 eq | TFAA               | 1.5 eq. | LiF            | 2.0 eq. | DME     | 100 °C | Trace |
| 15    | Et <sub>3</sub> N              | 0.5 eq | TFAA               | 1.5 eq. | NaF            | 2.0 eq. | DME     | 100 °C | 40%   |
| 16    | Et <sub>3</sub> N              | 0.5 eq | TFAA               | 1.5 eq. | CsF            | 2.0 eq. | DME     | 100 °C | 57%   |
| 17    | Et <sub>3</sub> N              | 0.5 eq | TFAA               | 1.5 eq. | KF             | 1.5 eq. | DME     | 100 °C | 63%   |
| 18    | Et <sub>3</sub> N              | 0.5 eq | TFAA               | 1.5 eq. | KF             | 2.5 eq. | DME     | 100 °C | 72%   |
| 19    | Et <sub>3</sub> N              | 0.5 eq | TFAA               | 1.5 eq. | KF             | 2.0 eq. | THF     | 100 °C | 62%   |
| 20    | Et <sub>3</sub> N              | 0.5 eq | TFAA               | 1.5 eq. | KF             | 2.0 eq. | dioxane | 100 °C | 53%   |
| 21    | Et <sub>3</sub> N              | 0.5 eq | TFAA               | 1.5 eq. | KF             | 2.0 eq. | DMF     | 100 °C | 35%   |
| 22    | Et <sub>3</sub> N              | 0.5 eq | TFAA               | 1.5 eq. | KF             | 2.0 eq. | Cy      | 100 °C | 50%   |
| 23    | Et <sub>3</sub> N              | 0.5 eq | TFAA               | 1.5 eq. | KF             | 2.0 eq. | toluene | 100 °C | 30%   |
| 24    | Et <sub>3</sub> N              | 0.5 eq | TFAA               | 1.5 eq. | KF             | 2.0 eq. | none    | 100 °C | 44%   |
| 25    | Et <sub>3</sub> N              | 0.5 eq | TFAA               | 1.5 eq. | KF             | 2.0 eq. | DME     | RT     | 30%   |
| 26    | Et <sub>3</sub> N              | 0.5 eq | TFAA               | 1.5 eq. | KF             | 2.0 eq. | DME     | 40 °C  | 32%   |
| 27    | Et <sub>3</sub> N              | 0.5 eq | TFAA               | 1.5 eq. | KF             | 2.0 eq. | DME     | 60 °C  | 43%   |
| 28    | Et <sub>3</sub> N              | 0.5 eq | TFAA               | 1.5 eq. | KF             | 2.0 eq. | DME     | 80 °C  | 52%   |
| 29    | Et <sub>3</sub> N              | 0.5 eq | TFAA               | 1.5 eq. | KF             | 2.0 eq. | DME     | 120 °C | 75%   |

### 3. Characterization Data for the Products

**2-Naphthoyl fluoride (2a)**<sup>1</sup>. The title compound was prepared according to procedure I and purified by column chromatography on silica gel and eluted with petroleum ether to afford a white solid in 76% yield (26.5 mg).  $V_{(\text{CO})} = 1705 \text{ cm}^{-1}$ .  $^1\text{H}$  NMR (400 MHz,  $\text{CDCl}_3$ )  $\delta$  8.64 (s, 1H), 8.01–7.91 (m, 4H), 7.68 (t,  $J = 7.1 \text{ Hz}$ , 1H), 7.61 (t,  $J = 7.4 \text{ Hz}$ , 1H);  $^{13}\text{C}$  NMR (100 MHz,  $\text{CDCl}_3$ )  $\delta$  157.7 (d,  $J = 343.5 \text{ Hz}$ ), 136.5 (s), 134.1 (d,  $J = 3.3 \text{ Hz}$ ), 132.3 (s), 129.7 (s), 129.7 (s), 129.1 (s), 128.0 (s), 127.4 (s), 125.6 (d,  $J = 4.2 \text{ Hz}$ ), 122.0 (d,  $J = 60.6 \text{ Hz}$ );  $^{19}\text{F}$  NMR (376 MHz,  $\text{CDCl}_3$ )  $\delta$  18.08.

**6-Methoxy-2-naphthoyl fluoride (2b)**. The title compound was prepared according to procedure I and purified by column chromatography on silica gel and eluted with petroleum ether to afford a white solid in 69% yield (28.0 mg). mp 109.7–113.0 °C.  $V_{(\text{CO})} = 1796 \text{ cm}^{-1}$ .  $^1\text{H}$  NMR (400 MHz,  $\text{CDCl}_3$ )  $\delta$  8.58 (s, 1H), 8.00 (dd,  $J = 8.6, 1.2 \text{ Hz}$ , 1H), 7.91 (d,  $J = 9.0 \text{ Hz}$ , 1H), 7.85 (d,  $J = 8.6 \text{ Hz}$ , 1H), 7.30–7.25 (m, 1H), 7.22 (d,  $J = 2.4 \text{ Hz}$ , 1H), 4.01 (s, 3H);  $^{13}\text{C}$  NMR (100 MHz,  $\text{CDCl}_3$ )  $\delta$  160.7 (s), 157.9 (d,  $J = 341.8 \text{ Hz}$ ), 138.4 (s), 133.8 (d,  $J = 3.3 \text{ Hz}$ ), 131.3 (s), 127.8 (s), 127.7 (s), 126.5 (d,  $J = 4.1 \text{ Hz}$ ), 120.4 (s), 119.6 (d,  $J = 60.7 \text{ Hz}$ ), 105.9 (s), 55.6 (s);  $^{19}\text{F}$  NMR (376 MHz,  $\text{CDCl}_3$ )  $\delta$  16.7 (s). HRMS (ESI, negative mode):  $\text{C}_{12}\text{H}_9\text{FO}_2$  for  $[\text{M} - \text{H}]^-$ , calculated 203.0514, found 203.0519.

**6-Bromo-2-naphthoyl fluoride (2c)**. The title compound was prepared according to procedure I and purified by column chromatography on silica gel and eluted with petroleum ether to afford a white solid in 61% yield (30.9 mg). mp 160.1–162.0 °C.  $V_{(\text{CO})} = 1726 \text{ cm}^{-1}$ .  $^1\text{H}$  NMR (400 MHz,  $\text{CDCl}_3$ )  $\delta$  8.60 (s, 1H), 8.10 (d,  $J = 1.6 \text{ Hz}$ , 1H), 8.03 (dd,  $J = 8.6, 1.2 \text{ Hz}$ , 1H), 7.87 (d,  $J = 2.7 \text{ Hz}$ , 1H), 7.85 (d,  $J = 2.7 \text{ Hz}$ , 1H), 7.69 (dd,  $J = 8.8, 1.9 \text{ Hz}$ , 1H);  $^{13}\text{C}$  NMR (100 MHz,  $\text{CDCl}_3$ )  $\delta$  157.3 (d,  $J = 343.8 \text{ Hz}$ ), 137.3 (s), 133.8 (d,  $J = 3.2 \text{ Hz}$ ), 131.1 (s), 131.0 (s), 130.7 (s), 130.2 (s), 128.2 (s), 126.8 (d,  $J = 4.1 \text{ Hz}$ ), 124.4 (s), 122.5 (d,  $J = 61.2 \text{ Hz}$ );  $^{19}\text{F}$  NMR (376 MHz,  $\text{CDCl}_3$ )  $\delta$  18.3 (s). HRMS (APCI, negative mode):  $\text{C}_{11}\text{H}_6\text{BrFO}$  for  $[\text{M} - \text{H}]^-$ , calculated 250.9513, found 250.9511.

**1-Naphthoyl fluoride (2d)**<sup>2</sup>. The title compound was prepared according to procedure I and purified by column chromatography on silica gel and eluted with petroleum ether to afford a white solid in 60% yield (20.9 mg).  $V_{(\text{CO})} = 1811 \text{ cm}^{-1}$ .  $^1\text{H}$  NMR (400 MHz,  $\text{CDCl}_3$ )  $\delta$  9.07 (d,  $J = 8.7 \text{ Hz}$ , 1H), 8.41 (dd,  $J = 7.4, 1.2 \text{ Hz}$ , 1H), 8.24 (d,  $J = 8.2 \text{ Hz}$ , 1H), 8.00 (d,  $J = 8.2 \text{ Hz}$ , 1H), 7.80–7.75 (m, 1H), 7.70–7.65 (m, 1H), 7.65–7.60 (m, 1H);  $^{13}\text{C}$  NMR (100 MHz,  $\text{CDCl}_3$ )  $\delta$  156.5 (d,  $J = 344.6 \text{ Hz}$ ), 136.7 (s), 133.9 (d,  $J = 4.0 \text{ Hz}$ ), 133.7 (d,  $J = 1.7 \text{ Hz}$ ), 132.2 (d,  $J = 7.2 \text{ Hz}$ ), 129.3 (s), 129.0

(s), 127.0 (s), 125.2 (s), 124.5 (s), 120.4 (d,  $J = 55.9$  Hz);  $^{19}\text{F}$  NMR (376 MHz,  $\text{CDCl}_3$ )  $\delta$  30.4.

**4-methyl-1-naphthoyl fluoride (2e)**<sup>1</sup>. The title compound was prepared according to procedure I and purified by column chromatography on silica gel and eluted with petroleum ether to afford a yellow solid in 89% yield (33.5 mg).  $V_{(\text{CO})} = 1793\text{ cm}^{-1}$ .  $^1\text{H}$  NMR (400 MHz,  $\text{CDCl}_3$ )  $\delta$  9.08 (d,  $J = 8.6$  Hz, 1H), 8.27 (d,  $J = 7.5$  Hz, 1H), 8.12 (d,  $J = 8.4$  Hz, 1H), 7.74–7.70 (m, 1H), 7.66–7.62 (m, 1H), 7.43 (d,  $J = 7.5$  Hz, 1H), 2.81 (s, 3H);  $^{13}\text{C}$  NMR (100 MHz,  $\text{CDCl}_3$ )  $\delta$  156.5 (d,  $J = 340.8$  Hz), 144.4 (s), 133.6 (d,  $J = 2.1$  Hz), 132.9 (d,  $J = 4.1$  Hz), 132.2 (d,  $J = 7.4$  Hz), 128.7 (s), 126.8 (s), 125.7 (s), 125.6 (s), 124.8 (s), 118.5 (d,  $J = 55.6$  Hz), 20.5 (s);  $^{19}\text{F}$  NMR (376 MHz,  $\text{CDCl}_3$ )  $\delta$  28.7 (s).

**Anthracene-9-carbonyl fluoride (2f)**<sup>3</sup>. The title compound was prepared according to procedure I and purified by column chromatography on silica gel and eluted with petroleum ether to afford a yellow solid in 87% yield (39.0 mg).  $V_{(\text{CO})} = 1830\text{ cm}^{-1}$ .  $^1\text{H}$  NMR (400 MHz,  $\text{CDCl}_3$ )  $\delta$  8.70 (s, 1H), 8.41–8.28 (m, 2H), 8.10 (d,  $J = 8.5$  Hz, 2H), 7.72–7.62 (m, 2H), 7.62–7.52 (m, 2H);  $^{13}\text{C}$  NMR (100 MHz,  $\text{CDCl}_3$ )  $\delta$  158.5 (d,  $J = 353.8$  Hz), 133.2 (s), 130.8 (s), 130.2 (s), 129.0 (s), 128.6 (s), 125.9 (s), 124.7 (d,  $J = 3.5$  Hz), 120.1 (d,  $J = 54.8$  Hz);  $^{19}\text{F}$  NMR (376 MHz,  $\text{CDCl}_3$ )  $\delta$  59.64 (s).

**[1,1'-Biphenyl]-4-carbonyl fluoride (2g)**<sup>4</sup>. The title compound was prepared according to procedure II (DMCHA) and purified by column chromatography on silica gel and eluted with petroleum ether to afford a white solid in 84% yield (33.6 mg).  $V_{(\text{CO})} = 1709\text{ cm}^{-1}$ .  $^1\text{H}$  NMR (400 MHz,  $\text{CDCl}_3$ )  $\delta$  8.14 (d,  $J = 8.4$  Hz, 2H), 7.77 (d,  $J = 7.5$  Hz, 2H), 7.68–7.64 (m, 2H), 7.55–7.50 (m, 2H), 7.49–7.45 (m, 1H);  $^{13}\text{C}$  NMR (100 MHz,  $\text{CDCl}_3$ )  $\delta$  156.4 (d,  $J = 343.2$  Hz), 147.1 (s), 138.2 (s), 131.0 (d,  $J = 3.9$  Hz), 128.1 (s), 127.8 (s), 126.6 (s), 126.3 (s), 122.5 (d,  $J = 61.2$  Hz);  $^{19}\text{F}$  NMR (376 MHz,  $\text{CDCl}_3$ )  $\delta$  18.1 (s).

**[1,1'-Biphenyl]-3-carbonyl fluoride (2h)**<sup>3</sup>. The title compound was prepared according to procedure II (DMCHA) and purified by column chromatography on silica gel and eluted with petroleum ether to afford a white solid in 67% yield (18.9 mg).  $V_{(\text{CO})} = 1815\text{ cm}^{-1}$ .  $^1\text{H}$  NMR (400 MHz,  $\text{CDCl}_3$ )  $\delta$  8.18 (dd,  $J_1 = J_2 = 1.7$  Hz, 1H), 7.94 (d,  $J = 7.8$  Hz, 1H), 7.83 (ddd,  $J = 7.8, 1.8, 1.2$  Hz, 1H), 7.54–7.48 (m, 3H), 7.44–7.37 (m, 2H), 7.35–7.31 (m, 1H);  $^{13}\text{C}$  NMR (100 MHz,  $\text{CDCl}_3$ )  $\delta$  157.4 (d,  $J = 344.8$  Hz), 142.4 (s), 139.2 (s), 134.9 (s), 130.1 (d,  $J = 4.2$  Hz), 130.0 (s), 129.6 (s), 129.1 (s), 128.3 (s), 127.2 (s), 125.5 (d,  $J = 60.5$  Hz);  $^{19}\text{F}$  NMR (376 MHz,  $\text{CDCl}_3$ )  $\delta$  18.7

(s).

**[1,1'-Biphenyl]-2-carbonyl fluoride (2i)**<sup>4</sup>. The title compound was prepared according to procedure II (DMCHA) and purified by column chromatography on silica gel and eluted with petroleum ether to afford a transparent liquid in 75% yield (30.2 mg).  $V_{(\text{CO})} = 1802 \text{ cm}^{-1}$ .  $^1\text{H}$  NMR (400 MHz,  $\text{CDCl}_3$ )  $\delta$  8.02 (d,  $J = 7.9 \text{ Hz}$ , 1H), 7.67–7.63 (m, 1H), 7.47 (t,  $J = 7.7 \text{ Hz}$ , 1H), 7.45–7.36 (m, 4H), 7.32–7.31 (m, 2H);  $^{13}\text{C}$  NMR (100 MHz,  $\text{CDCl}_3$ )  $\delta$  157.6 (d,  $J = 348.1 \text{ Hz}$ ), 145.5 (d,  $J = 2.5 \text{ Hz}$ ), 140.2 (s), 134.0 (s), 132.2 (d,  $J = 2.8 \text{ Hz}$ ), 131.8 (d,  $J = 2.4 \text{ Hz}$ ), 128.5 (s), 128.3 (s), 128.0 (s), 127.7 (s), 124.2 (d,  $J = 56.9 \text{ Hz}$ );  $^{19}\text{F}$  NMR (376 MHz,  $\text{CDCl}_3$ )  $\delta$  35.1 (s).

**4-Cyclohexylbenzoyl fluoride (2j)**<sup>4</sup>. The title compound was prepared according to procedure II (DMCHA) and purified by column chromatography on silica gel and eluted with petroleum ether to afford a white solid in 69% yield (28.4 mg).  $V_{(\text{CO})} = 1821 \text{ cm}^{-1}$ .  $^1\text{H}$  NMR (400 MHz,  $\text{CDCl}_3$ )  $\delta$  7.96 (d,  $J = 8.3 \text{ Hz}$ , 2H), 7.35 (d,  $J = 7.5 \text{ Hz}$ , 2H), 2.66–2.54 (m, 1H), 1.89–1.86 (m, 4H), 1.81–1.71 (m, 1H), 1.47–1.35 (m, 4H), 1.29–1.26 (m, 1H);  $^{13}\text{C}$  NMR (100 MHz,  $\text{CDCl}_3$ )  $\delta$  157.6 (d,  $J = 344.4 \text{ Hz}$ ), 156.4 (s), 131.7 (d,  $J = 4.1 \text{ Hz}$ ), 127.6 (s), 122.4 (d,  $J = 60.9 \text{ Hz}$ ), 44.9 (s), 34.0 (s), 26.6 (s), 26.0 (s);  $^{19}\text{F}$  NMR (376 MHz,  $\text{CDCl}_3$ )  $\delta$  17.5 (s).

**4-Phenoxybenzoyl fluoride (2k)**<sup>5</sup>. The title compound was prepared according to procedure II (DMCHA) and purified by column chromatography on silica gel and eluted with petroleum ether to afford a white solid in 78% yield (33.7 mg).  $V_{(\text{CO})} = 1695 \text{ cm}^{-1}$ .  $^1\text{H}$  NMR (400 MHz,  $\text{CDCl}_3$ )  $\delta$  7.94–7.87 (m, 2H), 7.38–7.30 (m, 2H), 7.17 (ddd,  $J = 9.7, 5.5, 4.2 \text{ Hz}$ , 1H), 7.03–6.98 (m, 2H), 6.94 (dd,  $J = 8.9, 1.1 \text{ Hz}$ , 2H);  $^{13}\text{C}$  NMR (100 MHz,  $\text{CDCl}_3$ ) 164.1 (s), 158.7 (d,  $J = 342.4 \text{ Hz}$ ), 154.7 (s), 133.8 (d,  $J = 3.9 \text{ Hz}$ ), 130.3 (s), 125.3 (s), 120.6 (s), 118.5 (d,  $J = 62.1 \text{ Hz}$ ), 117.4 (s);  $^{19}\text{F}$  NMR (376 MHz,  $\text{CDCl}_3$ )  $\delta$  17.0 (s).

**4-(Dimethylamino)benzoyl fluoride (2l)**<sup>1</sup>. The title compound was prepared according to procedure II (DMCHA) and purified by column chromatography on silica gel and eluted with petroleum ether to afford a white solid in 49% yield (16.4 mg).  $V_{(\text{CO})} = 1786 \text{ cm}^{-1}$ .  $^1\text{H}$  NMR (400 MHz,  $\text{CDCl}_3$ )  $\delta$  7.79 (d,  $J = 9.0 \text{ Hz}$ , 2H), 6.59 (d,  $J = 8.0 \text{ Hz}$ , 2H), 3.02 (s, 6H);  $^{13}\text{C}$  NMR (100 MHz,  $\text{CDCl}_3$ )  $\delta$  158.2 (d,  $J = 334.9 \text{ Hz}$ ), 154.6 (s), 133.5 (d,  $J = 4.3 \text{ Hz}$ ), 111.0 (d,  $J = 1.0 \text{ Hz}$ ), 110.3 (d,  $J = 61.3 \text{ Hz}$ ), 40.0 (s);  $^{19}\text{F}$  NMR (376 MHz,  $\text{CDCl}_3$ )  $\delta$  12.4 (s).

**4-Iodobenzoyl fluoride (2m)**<sup>6</sup>. The title compound was prepared according to procedure II (DMCHA) and purified by column chromatography on silica gel and eluted with petroleum ether to

afford a white solid in 50% yield (25.0 mg).  $V_{(\text{CO})} = 1821 \text{ cm}^{-1}$ .  $^1\text{H}$  NMR (400 MHz,  $\text{CDCl}_3$ )  $\delta$  7.90– $\delta$  7.82 (m, 2H), 7.72–7.63 (m, 2H);  $^{13}\text{C}$  NMR (100 MHz,  $\text{CDCl}_3$ )  $\delta$  157.1 (d,  $J = 343.9 \text{ Hz}$ ), 138.6 (s), 132.5 (d,  $J = 3.7 \text{ Hz}$ ), 124.4 (d,  $J = 62.4 \text{ Hz}$ ), 104.0 (s);  $^{19}\text{F}$  NMR (376 MHz,  $\text{CDCl}_3$ )  $\delta$  18.3 (s).

**2-Iodobenzoyl fluoride (2n)**<sup>1</sup>. The title compound was prepared according to procedure II (DMCHA) and purified by column chromatography on silica gel and eluted with petroleum ether to afford a white solid in 48% yield (24.0 mg).  $V_{(\text{CO})} = 1819 \text{ cm}^{-1}$ .  $^1\text{H}$  NMR (400 MHz,  $\text{CDCl}_3$ )  $\delta$  8.06 (d,  $J = 8.0 \text{ Hz}$ , 1H), 7.96 (dd,  $J = 7.9, 1.6 \text{ Hz}$ , 1H), 7.44 (ddd,  $J = 7.9, 7.9, 1.0 \text{ Hz}$ , 1H), 7.23 (ddd,  $J = 7.7, 7.7, 1.7 \text{ Hz}$ , 1H).  $^{13}\text{C}$  NMR (100 MHz,  $\text{CDCl}_3$ )  $\delta$  155.3 (d,  $J = 345.1 \text{ Hz}$ ), 142.7 (d,  $J = 3.7 \text{ Hz}$ ), 135.2 (s), 133.4 (d,  $J = 1.8 \text{ Hz}$ ), 128.4 (s), 128.4 (d,  $J = 61 \text{ Hz}$ ), 97.1 (d,  $J = 5.9 \text{ Hz}$ );  $^{19}\text{F}$  NMR (376 MHz,  $\text{CDCl}_3$ )  $\delta$  28.7 (s).

**4-Nitrobenzoyl fluoride (2o)**<sup>2</sup>. The title compound was prepared according to procedure II (BDMA) and purified by column chromatography on silica gel and eluted with petroleum ether to afford a white solid in 71% yield (24.0 mg).  $V_{(\text{CO})} = 1830 \text{ cm}^{-1}$ .  $^1\text{H}$  NMR (400 MHz,  $\text{CDCl}_3$ )  $\delta$  8.41 (d,  $J = 8.0 \text{ Hz}$ , 2H), 8.28 (d,  $J = 8.8 \text{ Hz}$ , 2H);  $^{13}\text{C}$  NMR (100 MHz,  $\text{CDCl}_3$ )  $\delta$  155.5 (d,  $J = 346.4 \text{ Hz}$ ), 151.8 (s), 132.6 (d,  $J = 3.6 \text{ Hz}$ ), 130.3 (d,  $J = 63.3 \text{ Hz}$ ), 124.2 (s);  $^{19}\text{F}$  NMR (376 MHz,  $\text{CDCl}_3$ )  $\delta$  21.34 (s).

**4-Benzoylbenzoyl fluoride (2p)**<sup>7</sup>. The title compound was prepared according to procedure II (DMCHA) and purified by column chromatography on silica gel and eluted with petroleum ether to afford a white solid in 62% yield (28.3 mg).  $V_{(\text{CO})} = 1827 \text{ cm}^{-1}$ .  $^1\text{H}$  NMR (400 MHz,  $\text{CDCl}_3$ )  $\delta$  8.18 (d,  $J = 8.3 \text{ Hz}$ , 2H), 7.91 (d,  $J = 7.6 \text{ Hz}$ , 2H), 7.84–7.77 (m, 2H), 7.69–7.60 (m, 1H), 7.56–7.48 (m, 2H);  $^{13}\text{C}$  NMR (100 MHz,  $\text{CDCl}_3$ )  $\delta$  195.4 (s), 156.6 (d,  $J = 345.4 \text{ Hz}$ ), 143.5 (s), 136.4 (s), 133.4 (s), 131.4 (s), 131.4 (s), 130.1 (s), 128.6 (s), 127.8 (d,  $J = 61.7 \text{ Hz}$ );  $^{19}\text{F}$  NMR (376 MHz,  $\text{CDCl}_3$ )  $\delta$  19.9 (s).

**Benzofuran-2-carbonyl fluoride (2q)**<sup>7</sup>. The title compound was prepared according to procedure II (DMCHA) and purified by column chromatography on silica gel and eluted with petroleum ether to afford a white solid in 50% yield (16.4 mg).  $V_{(\text{CO})} = 1732 \text{ cm}^{-1}$ .  $^1\text{H}$  NMR (400 MHz,  $\text{CDCl}_3$ )  $\delta$  7.77–7.75 (m, 2H), 7.63 (d,  $J = 8.5 \text{ Hz}$ , 1H), 7.57 (dd,  $J_1 = J_2 = 8.0 \text{ Hz}$ , 1H), 7.38 (dd,  $J_1 = J_2 = 8.0 \text{ Hz}$ , 1H);  $^{13}\text{C}$  NMR (100 MHz,  $\text{CDCl}_3$ )  $\delta$  156.9 (d,  $J = 2.3 \text{ Hz}$ ), 149.4 (d,  $J = 329.9 \text{ Hz}$ ), 139.8 (d,  $J = 89.5 \text{ Hz}$ ), 129.5 (s), 126.3 (s), 124.6 (s), 123.6 (s), 119.4 (s), 112.7 (s);  $^{19}\text{F}$  NMR (376 MHz,  $\text{CDCl}_3$ )

$\delta$  17.4 (s).

**Benzo[b]thiophene-2-carbonyl fluoride (2r)**<sup>2</sup>. The title compound was prepared according to procedure II (DMCHA) and purified by column chromatography on silica gel and eluted with petroleum ether to afford a white solid in 64% yield (23.0 mg).  $V_{(\text{CO})} = 1670 \text{ cm}^{-1}$ .  $^1\text{H}$  NMR (400 MHz,  $\text{CDCl}_3$ )  $\delta$  8.26 (s, 1H), 8.02–7.92 (m, 2H), 7.63–7.57 (m, 1H), 7.50–7.50 (m, 1H);  $^{13}\text{C}$  NMR (100 MHz,  $\text{CDCl}_3$ )  $\delta$  153.2 (d,  $J = 335.3 \text{ Hz}$ ), 143.7 (s), 138.2 (s), 135.2 (d,  $J = 1.4 \text{ Hz}$ ), 128.5 (s), 126.5 (s), 126.4 (s), 125.7 (s), 123.0 (s);  $^{19}\text{F}$  NMR (376 MHz,  $\text{CDCl}_3$ )  $\delta$  25.1 (s). HRMS (ESI, positive mode):  $\text{C}_{12}\text{H}_7\text{FO}$  for  $[\text{M} + \text{H}]^+$ , calculated 303.2119, found 303.2120.

**(E)-3-(p-tolyl)acryloyl fluoride(2s)**<sup>8</sup>. The title compound was prepared according to procedure II (BDMA) and purified by column chromatography on silica gel and eluted with petroleum ether to afford a white solid in 50% yield (16.4 mg).  $V_{(\text{CO})} = 1694 \text{ cm}^{-1}$ .  $^1\text{H}$  NMR (400 MHz,  $\text{CDCl}_3$ )  $\delta$  7.81 (d,  $J = 15.9 \text{ Hz}$ , 1H), 7.46 (d,  $J = 8.0 \text{ Hz}$ , 2H), 7.24 (d,  $J = 8.0 \text{ Hz}$ , 2H), 6.31 (dd,  $J = 15.9, 7.4 \text{ Hz}$ , 1H), 2.40 (s, 3H);  $^{13}\text{C}$  NMR (100 MHz,  $\text{CDCl}_3$ )  $\delta$  157.3 (d,  $J = 335.6 \text{ Hz}$ ), 151.4 (d,  $J = 6.0 \text{ Hz}$ ), 142.6 (s), 130.4 (s), 129.9 (s), 128.7 (s), 110.8 (d,  $J = 69.6 \text{ Hz}$ ), 21.6 (s);  $^{19}\text{F}$  NMR (376 MHz,  $\text{CDCl}_3$ )  $\delta$  25.0 (s).

**(E)-3-(4-methoxyphenyl)acryloyl fluoride(2t)**<sup>8</sup>. The title compound was prepared according to procedure II (BDMA) and purified by column chromatography on silica gel and eluted with petroleum ether to afford a white solid in 85% yield (30.0 mg).  $V_{(\text{CO})} = 1690 \text{ cm}^{-1}$ .  $^1\text{H}$  NMR (400 MHz,  $\text{CDCl}_3$ )  $\delta$  7.79 (d,  $J = 15.9 \text{ Hz}$ , 1H), 7.56–7.46 (m, 2H), 7.01–6.87 (m, 2H), 6.22 (dd,  $J = 15.9, 7.3 \text{ Hz}$ , 1H), 3.86 (s, 3H);  $^{13}\text{C}$  NMR (100 MHz,  $\text{CDCl}_3$ )  $\delta$  162.6 (s), 157.6 (d,  $J = 334.7 \text{ Hz}$ ), 151.1 (d,  $J = 6.3 \text{ Hz}$ ), 130.6 (s), 125.9 (s), 114.6 (s), 109.1 (d,  $J = 66.7 \text{ Hz}$ ), 55.5 (s);  $^{19}\text{F}$  NMR (376 MHz,  $\text{CDCl}_3$ )  $\delta$  24.4 (s).

**(E)-3-(4-bromophenyl)acryloyl fluoride (2u)**<sup>8</sup>. The title compound was prepared according to procedure II (BDMA) and purified by column chromatography on silica gel and eluted with petroleum ether to afford a white solid in 65% yield (29.4 mg).  $V_{(\text{CO})} = 1790 \text{ cm}^{-1}$ .  $^1\text{H}$  NMR (400 MHz,  $\text{CDCl}_3$ )  $\delta$  7.77 (d,  $J = 16.0 \text{ Hz}$ , 1H), 7.62–7.52 (m, 2H), 7.45–7.38 (m, 2H), 6.37 (dd,  $J = 16.0, 7.1 \text{ Hz}$ , 1H);  $^{13}\text{C}$  NMR (100 MHz,  $\text{CDCl}_3$ )  $\delta$  156.8 (d,  $J = 336.7 \text{ Hz}$ ), 149.9 (d,  $J = 6.0 \text{ Hz}$ ), 132.5 (s), 132.0 (s), 130.0 (s), 126.4 (s), 112.8 (d,  $J = 67.3 \text{ Hz}$ );  $^{19}\text{F}$  NMR (376 MHz,  $\text{CDCl}_3$ )  $\delta$  26.0 (s).

**(2E,4E,6E,8E)-3,7-dimethyl-9-(2,6,6-trimethylcyclohex-1-en-1-yl)nona-2,4,6,8-tetraenoyl fluoride (2v)**<sup>9</sup>. The title compound was prepared according to procedure I and purified by column



chromatography on silica gel and eluted with petroleum ether to afford white oil in 72% yield (43.5 mg).  $V_{(\text{CO})} = 1848 \text{ cm}^{-1}$ .  $^1\text{H}$  NMR (400 MHz,  $\text{CDCl}_3$ )  $\delta$  7.09 (dd,  $J = 15.0, 11.5 \text{ Hz}$ , 1H), 6.31–6.24 (m, 2H), 6.11 (s, 1H), 6.08 (d,  $J = 4.4 \text{ Hz}$ , 1H), 5.62 (s, 1H), 2.32 (s, 3H), 1.95 (s, 5H), 1.65 (s, 3H), 1.59–1.51 (m, 2H), 1.44–1.35 (m, 2H), 0.96 (s, 6H);  $^{13}\text{C}$  NMR (100 MHz,  $\text{CDCl}_3$ )  $\delta$  161.1 (d,  $J = 17.9 \text{ Hz}$ ),  $\delta$  156.9 (d,  $J = 331.3 \text{ Hz}$ ), 142.3 (s), 137.6 (s), 137.0 (s), 134.2 (s), 133.4 (d,  $J = 3.3 \text{ Hz}$ ), 130.7 (s), 130.2 (s), 129.0 (s), 111.5 (d,  $J = 74.3 \text{ Hz}$ ), 39.6 (s), 34.3 (s), 33.2 (s), 29.7 (s), 28.9 (s), 21.8 (s), 19.2 (s), 14.6 (s), 13.1 (s);  $^{19}\text{F}$  NMR (376 MHz,  $\text{CDCl}_3$ )  $\delta$  42.2 (s).

***Benzo[d][1,3]dioxole-5-carbonyl fluoride (2w)***<sup>2</sup>. The title compound was prepared according to procedure I and purified by column chromatography on silica gel and eluted with petroleum ether to afford a white solid in 78% yield (26.2 mg).  $V_{(\text{CO})} = 1730 \text{ cm}^{-1}$ .  $^1\text{H}$  NMR (400 MHz,  $\text{CDCl}_3$ )  $\delta$  7.67 (dd,  $J = 8.2, 1.7 \text{ Hz}$ , 1H), 7.42 (d,  $J = 1.7 \text{ Hz}$ , 1H), 6.91 (dd,  $J = 8.2, 0.9 \text{ Hz}$ , 1H), 6.11 (s, 2H);  $^{13}\text{C}$  NMR (100 MHz,  $\text{CDCl}_3$ )  $\delta$  156.9 (d,  $J = 338.1 \text{ Hz}$ ), 153.7 (s), 148.3 (s),  $\delta$  128.3 (d,  $J = 4.1 \text{ Hz}$ ), 118.4 (d,  $J = 62.4 \text{ Hz}$ ), 110.7 (d,  $J = 4.1 \text{ Hz}$ ), 108.6 (s), 102.4 (s);  $^{19}\text{F}$  NMR (376 MHz,  $\text{CDCl}_3$ )  $\delta$  16.4 (s).

***2-(Naphthalen-2-yl)acetyl fluoride (2x)***<sup>2</sup>. The title compound was prepared according to procedure II (BDMA) and purified by column chromatography on silica gel and eluted with petroleum ether to afford a white solid in 32% yield (12.0 mg).  $V_{(\text{CO})} = 1719 \text{ cm}^{-1}$ .  $^1\text{H}$  NMR (400 MHz,  $\text{CDCl}_3$ )  $\delta$  7.74–7.70 (m, 3H), 7.65 (s, 1H), 7.42–7.35 (m, 2H), 7.32 (dd,  $J = 8.4, 1.4 \text{ Hz}$ , 1H), 3.73 (s, 2H);  $^{13}\text{C}$  NMR (100 MHz,  $\text{CDCl}_3$ )  $\delta$  161.3 (d,  $J = 377.9 \text{ Hz}$ ), 133.1 (d,  $J = 58.4 \text{ Hz}$ ), 128.8 (s), 128.5 (s), 128.1 (d,  $J = 2.4 \text{ Hz}$ ), 127.8 (s), 126.8 (s), 126.6 (s), 126.4 (s), 39.2 (d,  $J = 54.6 \text{ Hz}$ );  $^{19}\text{F}$  NMR (376 MHz,  $\text{CDCl}_3$ )  $\delta$  45.2 (s).

***morpholino(naphthalen-2-yl)methanone (3)***.  $^1\text{H}$  NMR (400 MHz,  $\text{CDCl}_3$ )  $\delta$  7.83–7.76 (m, 4H), 7.49–7.45 (m, 2H), 7.41 (dd,  $J = 9.6, 1.6 \text{ Hz}$ , 1H), 3.57 (m, 8H);  $^{13}\text{C}$  NMR (100 MHz,  $\text{CDCl}_3$ )  $\delta$  169.4 (s), 132.7 (s), 131.6 (s), 132.5 (s), 127.4 (s), 127.3 (s), 126.8 (s), 126.2 (s), 126.0 (s), 125.8 (s), 123.2 (s), 76.5 (s), 76.1 (s), 75.8 (s).

***S-(pyridin-4-yl) naphthalene-2-carbothioate (4)***.  $^1\text{H}$  NMR (400 MHz,  $\text{CDCl}_3$ )  $\delta$  8.62 (d,  $J = 6.0 \text{ Hz}$ , 2H), 8.51 (s, 1H), 7.91 (dd,  $J = 8.8, 2.4 \text{ Hz}$ , 2H), 7.83 (m, 2H), 7.60–7.48 (m, 2H), 7.44 (dd,  $J = 4.4, 2.8 \text{ Hz}$ , 2H).  $^{13}\text{C}$  NMR (100 MHz,  $\text{CDCl}_3$ )  $\delta$  187.5 (s), 145.0 (s), 138.9 (s), 136.1 (s), 133.4 (s), 132.4 (s), 129.7 (s), 129.4 (s), 129.1 (s), 128.9 (s), 128.6 (s), 127.9 (s), 127.3 (s), 123.1 (s).

***naphthalen-2-yl(perfluorophenyl)methanone (5)***.  $^1\text{H}$  NMR (400 MHz,  $\text{CDCl}_3$ )  $\delta$  8.13 (s, 1H), 7.91

(dd,  $J = 8.8, 2.0$  Hz, 1H), 7.87–7.78 (m, 3H), 7.56 (m, 1H), 7.51–7.44 (m, 1H);  $^{13}\text{C}$  NMR (100 MHz,  $\text{CDCl}_3$ )  $\delta$  184.1 (s), 144.2–143.9 (m), 143.9–142.6 (m), 141.7–141.5 (m), 140.3–140.0 (m), 138.1–137.8 (m), 135.4 (s), 132.4 (s), 131.9 (s), 131.3 (s), 128.8 (s), 128.7 (s), 128.2 (s), 126.9 (s), 126.3 (s), 122.7 (s), 113.3–112.9 (m).

**2-(naphthalen-2-yl)benzo[d]oxazole (6).**  $^1\text{H}$  NMR (400 MHz,  $\text{CDCl}_3$ )  $\delta$  8.70 (s, 1H), 8.23 (dd,  $J = 8.6, 1.6$  Hz, 1H), 7.89 (dd,  $J = 8.8, 5.3$  Hz, 2H), 7.84–7.77 (m, 1H), 7.73 (dd,  $J = 6.2, 3.0$  Hz, 1H), 7.58–7.43 (m, 3H), 7.34–7.24 (m, 2H);  $^{13}\text{C}$  NMR (100 MHz,  $\text{CDCl}_3$ )  $\delta$  163.2 (s), 150.9 (s), 142.2 (s), 134.8 (s), 133.0 (s), 128.9 (s), 128.8 (s), 128.2 (s), 127.9 (s), 127.9 (s), 126.9 (s), 125.2 (s), 124.7 (s), 124.4 (s), 123.9 (s), 120.04 (s), 110.64 (s).

**triisopropyl(naphthalen-2-ylethynyl)silane (7).**  $^1\text{H}$  NMR (400 MHz,  $\text{CDCl}_3$ )  $\delta$  7.9 (s, 1H), 7.70–7.65 (m, 3H), 7.43 (dd,  $J = 8.4, 1.2$  Hz, 1H), 7.40–7.37 (m, 2H), 1.08 (s, 18H), 1.00 (s, 3H);  $^{13}\text{C}$  NMR (100 MHz,  $\text{CDCl}_3$ )  $\delta$  132.9 (s), 132.8 (s), 131.9 (s), 128.9 (s), 127.9 (s), 127.8 (s), 127.7 (s), 126.7 (s), 126.5 (s), 120.9 (s), 107.5 (s), 90.9 (s), 18.6 (s), 11.4 (s).

**cyano(phenyl)methyl-2-naphthoate (8).**  $^1\text{H}$  NMR (400 MHz,  $\text{CDCl}_3$ )  $\delta$  8.54 (s, 1H), 7.95 (dd,  $J = 8.4, 1.6$  Hz, 1H), 7.85 (d,  $J = 8.4$  Hz, 1H), 7.79 (dd,  $J = 8.8, 4.4$  Hz, 2H), 7.60–7.55 (m, 2H), 7.55–7.50 (m, 1H), 7.49–7.44 (m, 1H), 7.40 (m, 3H), 6.66 (s, 1H);  $^{13}\text{C}$  NMR (100 MHz,  $\text{CDCl}_3$ )  $\delta$  164.9 (s), 135.9 (s), 132.4 (s), 132.1 (s), 131.9 (s), 130.5 (s), 129.5 (s), 129.4 (s), 128.9 (s), 128.6 (s), 127.9 (s), 127.9 (s), 127.1 (s), 125.3 (s), 125.1 (s), 116.3 (s), 63.5 (s).

## 4 References

- (1) Munoz, S. B.; Dang, H.; Ispizua-Rodriguez, X.; Mathew, T.; Prakash, G. S. Direct Access to Acyl Fluorides From Carboxylic Acids Using A Phosphine/Fluoride Deoxyfluorination Reagent System. *Org. Lett.* **2019**, *21*, 1659–1663.
- (2) Wang, X.; Wang, F.; Huang, F.; Ni, C.; Hu, J. Deoxyfluorination of Carboxylic Acids with CpFluor: Access to Acyl Fluorides and Amides. *Org. Lett.* **2021**, *23*, 1764–1768.
- (3) Wang, Z.; Wang, X.; Nishihara, Y. Nickel-Catalysed Decarbonylative Borylation of Aroyl Fluorides. *Chem. Commun.* **2018**, *54*, 13969–13972. (e) Wang, X.; Wang, Z.; Asanuma, Y.; Nishihara, Y. Synthesis of 2-Substituted Propenes by Bidentate Phosphine-Assisted Methylenation of Acyl Fluorides and Acyl Chlorides with AlMe<sub>3</sub>. *Org. Lett.* **2019**, *21*, 3640–3643.
- (4) Liang, Y.; Zhao, Z.; Taya, A.; Shibata, N. Acyl Fluorides from Carboxylic Acids, Aldehydes, or Alcohols under Oxidative Fluorination. *Org. Lett.* **2021**, *23*, 847–852.
- (5) Keaveney, S. T.; Schoenebeck, F. Palladium-Catalyzed Decarbonylative Trifluoromethylation of Acid Fluorides. *Angew. Chem., Int. Ed.* **2018**, *57*, 4073–4077.
- (6) Mao, S.; Kramer, J.; Sun, H. Deoxyfluorination of Carboxylic Acids with KF and Highly Electron-Deficient Fluoroarenes. *J. Org. Chem.* **2021**, *86*, 6066–6074.
- (7) Kaduk, C.; Wenschuh, H.; Beyermann, M.; Forner, K.; Carpino, L. A.; Bienert, M. Synthesis of Fmoc-amino Acid Fluorides via DAST, An Alternative Fluorinating Agent. *Lett. Pept. Sci.* **1996**, *2*, 285–288.
- (8) Candish, L.; Forsyth, C. M.; Lupton D. W. *N*-tert-Butyl Triazolylienes: Catalysts for the Enantioselective (3+2) Annulation of  $\alpha,\beta$ -Unsaturated Acyl Azoliums. *Angew. Chem. Int. Ed.* **2013**, *52*, 9149–9152.
- (9) Barua, A. B.; Olson, J.A. Preparation of Retinamides by Use of Retinoyl Fluoride. *Journal of Lipid Research* **1985**, *26*, 258-62.

**5. Copies of  $^1\text{H}$ ,  $^{13}\text{C}$   
 $^1\text{H}$  NMR (400 MHz,**

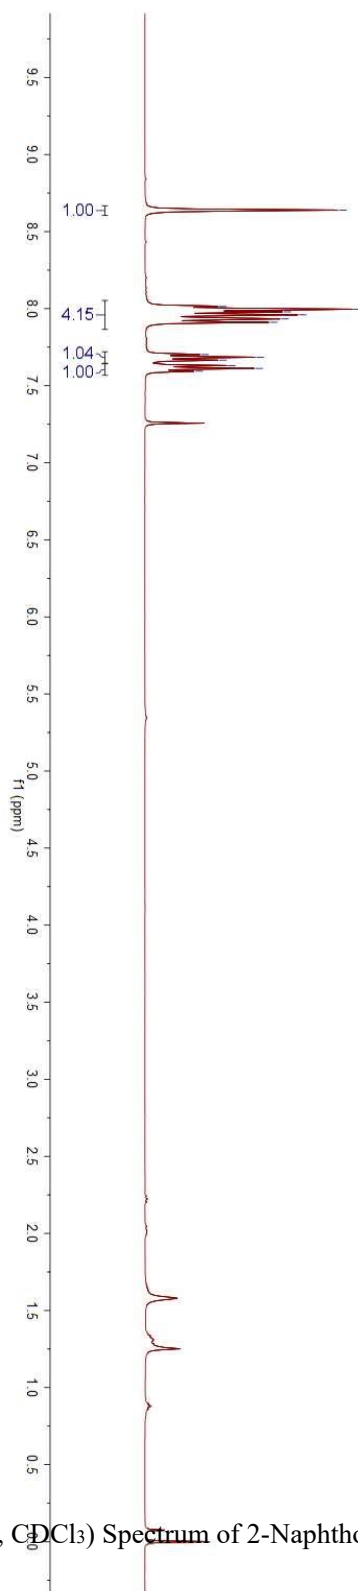

$^{13}\text{C}$  NMR (101 MHz,  $\text{CDCl}_3$ ) Spectrum of 2-Naphthoyl fluoride (**2a**)

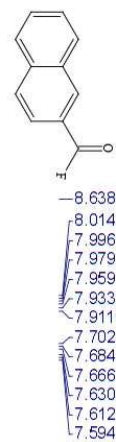

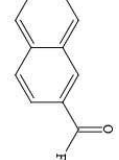

—159.395  
—155.981

136.460  
134.076  
134.044  
132.296  
129.724  
129.672  
129.088  
127.982  
127.400  
125.663  
125.622  
122.314  
121.711

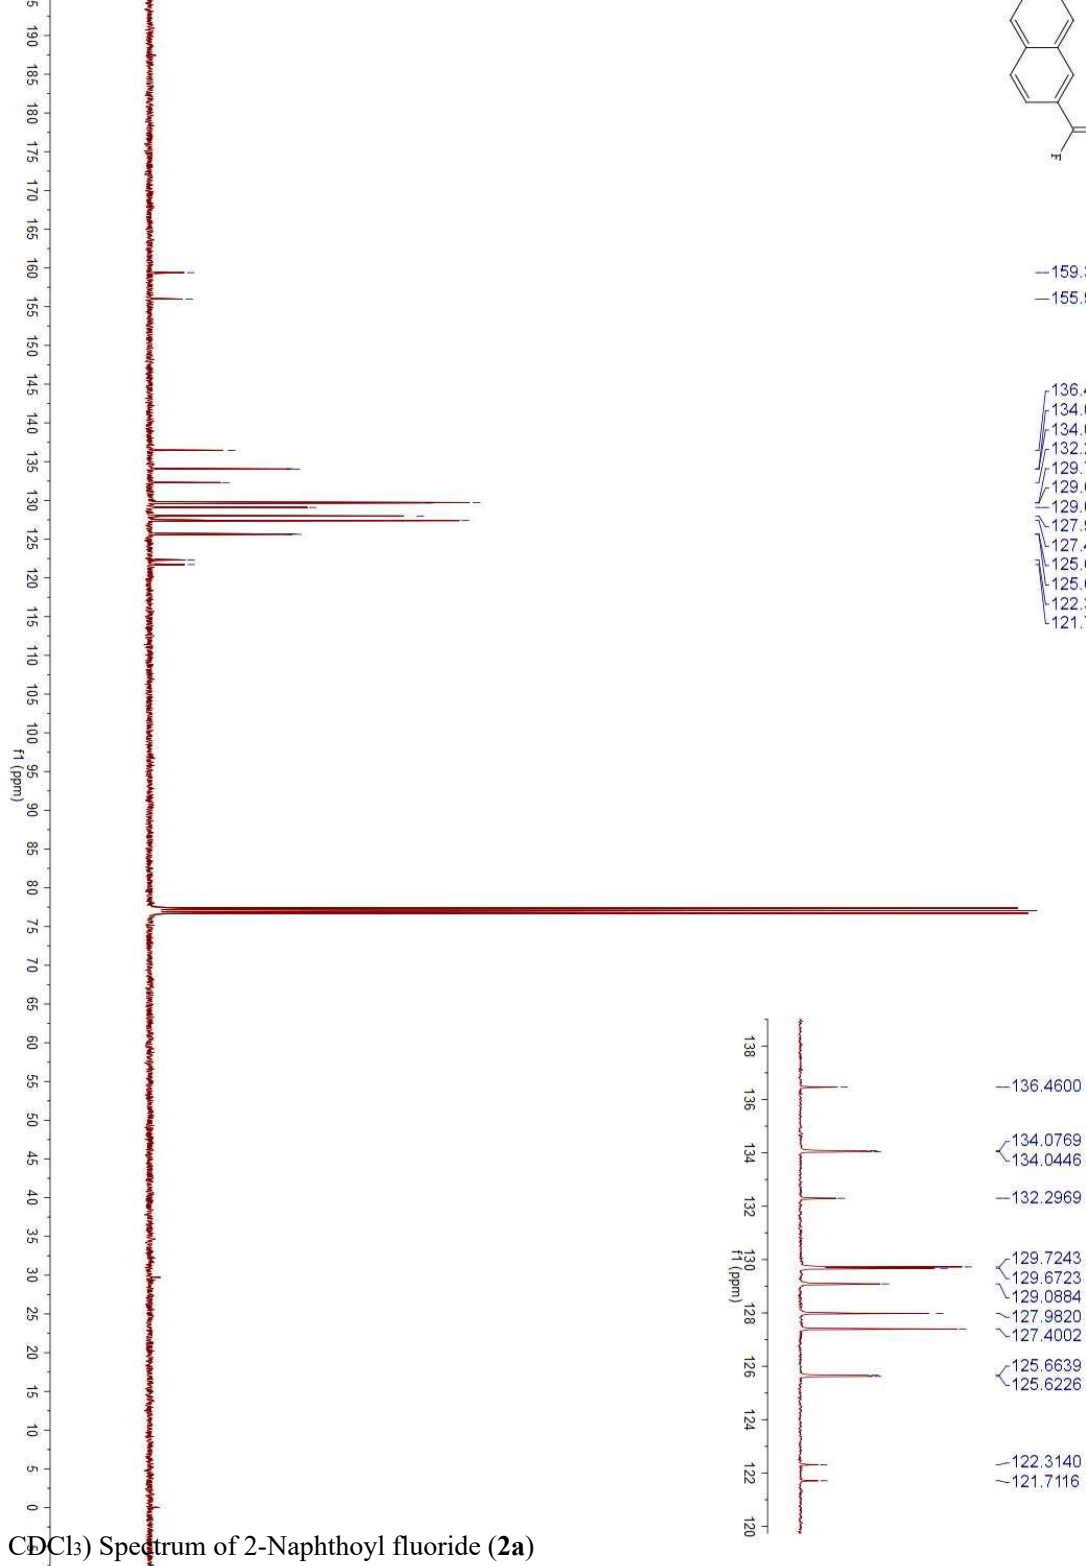

$^{19}\text{F}$  NMR (376 MHz,  $\text{CDCl}_3$ ) Spectrum of 2-Naphthoyl fluoride (**2a**)

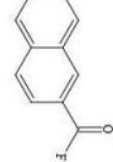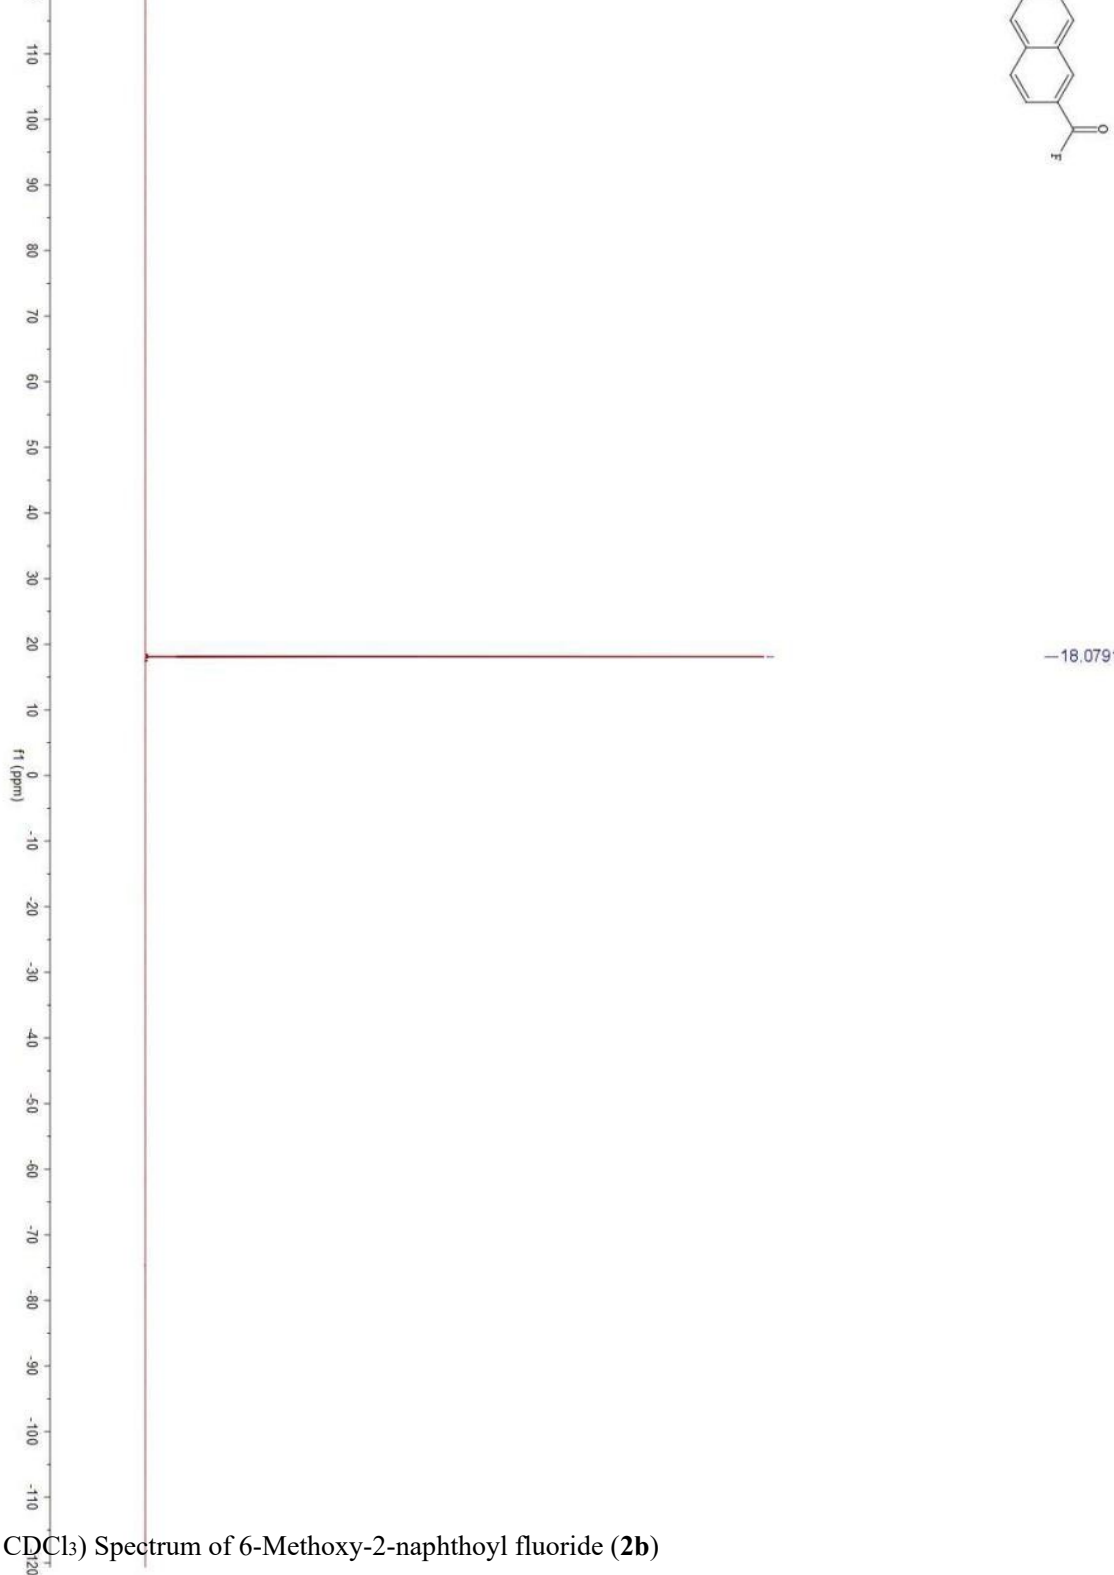

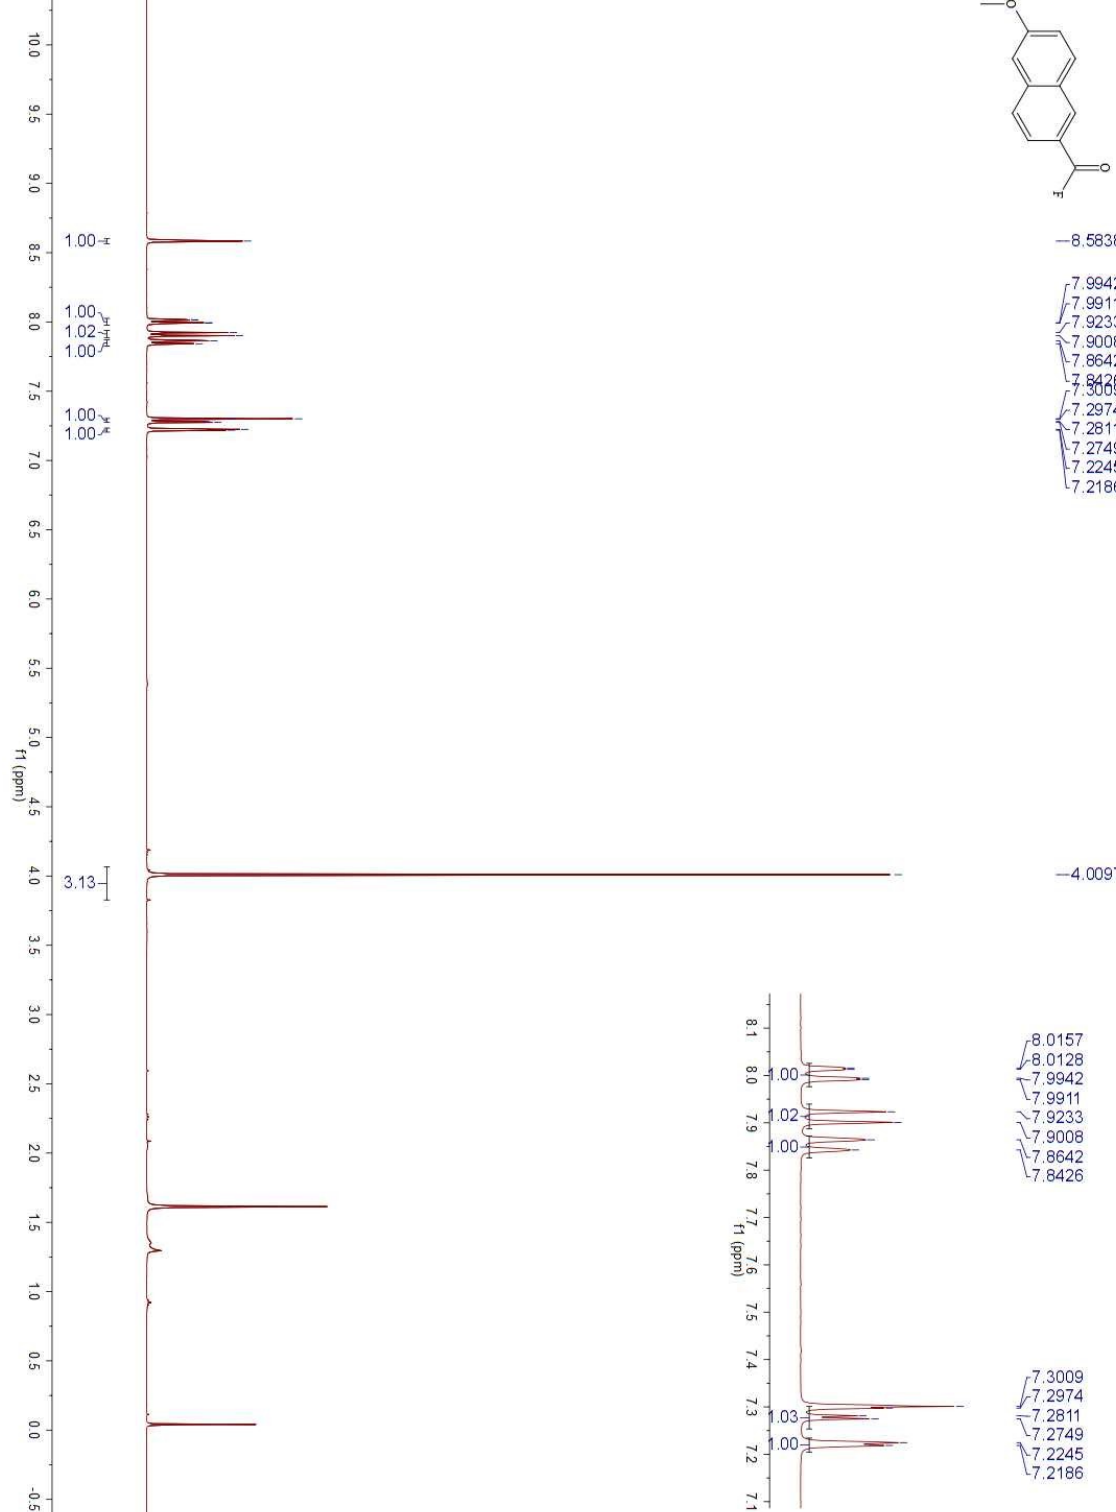

$^{19}\text{F}$  NMR (376 MHz,  $\text{CDCl}_3$ ) Spectrum of 6-Methoxy-2-naphthoyl fluoride (**2b**)

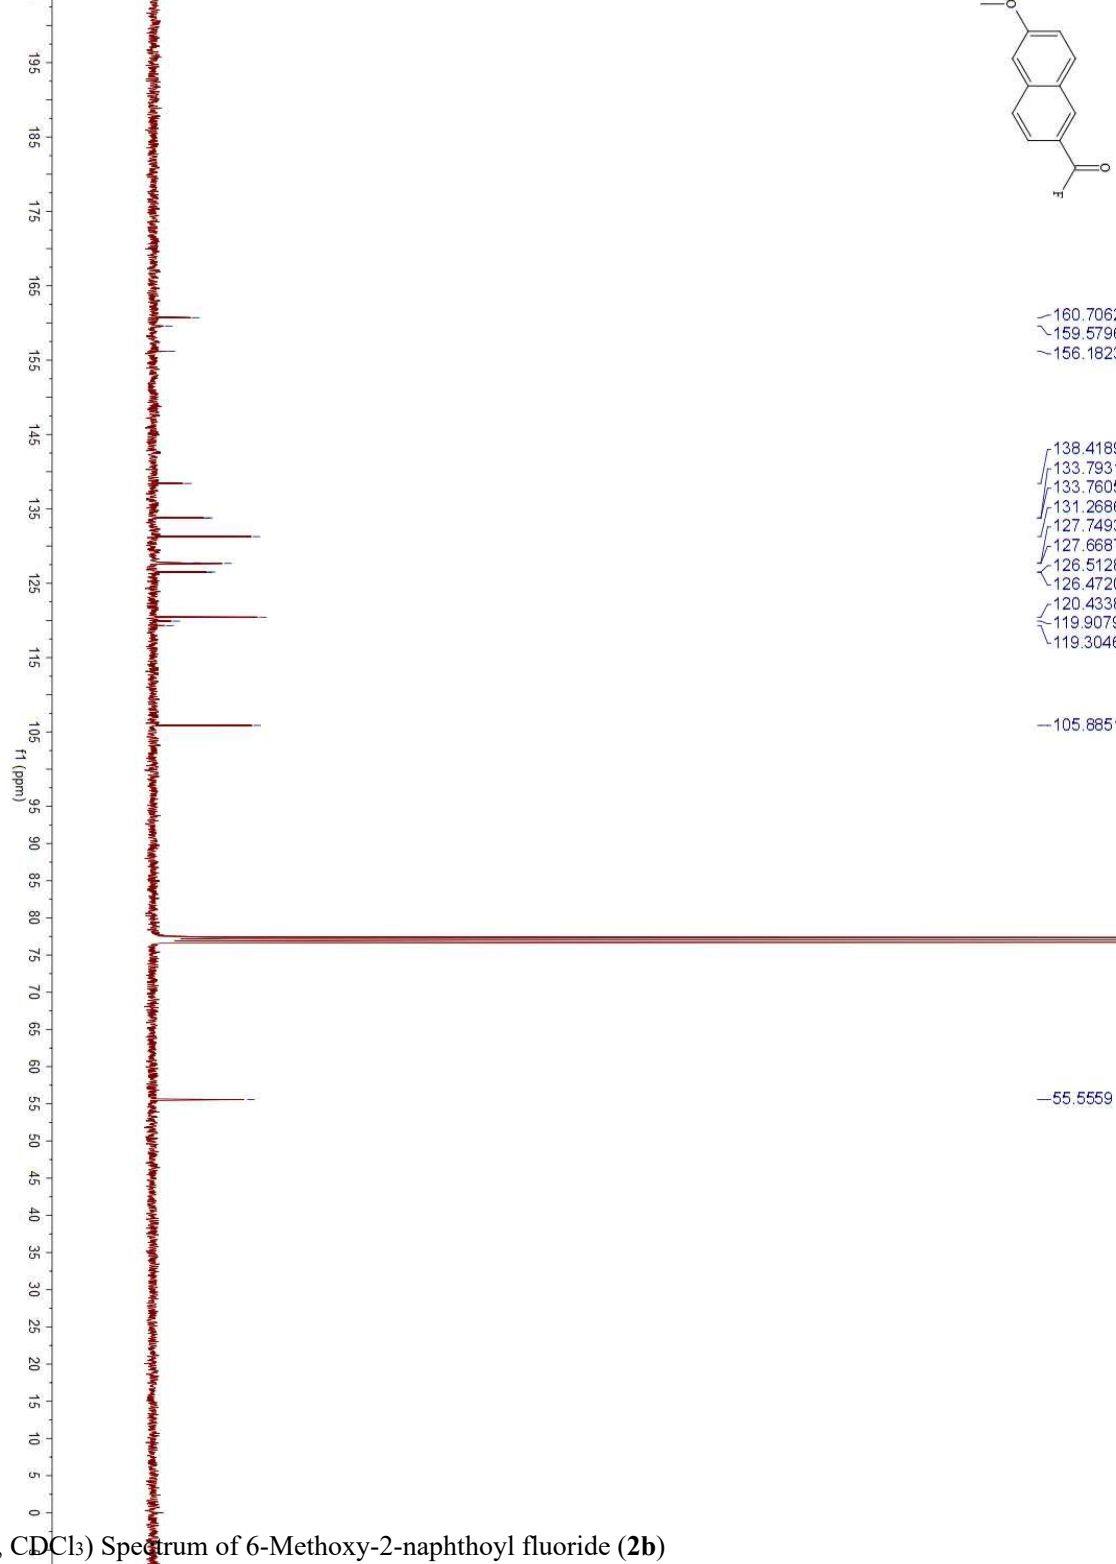



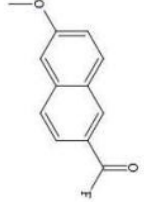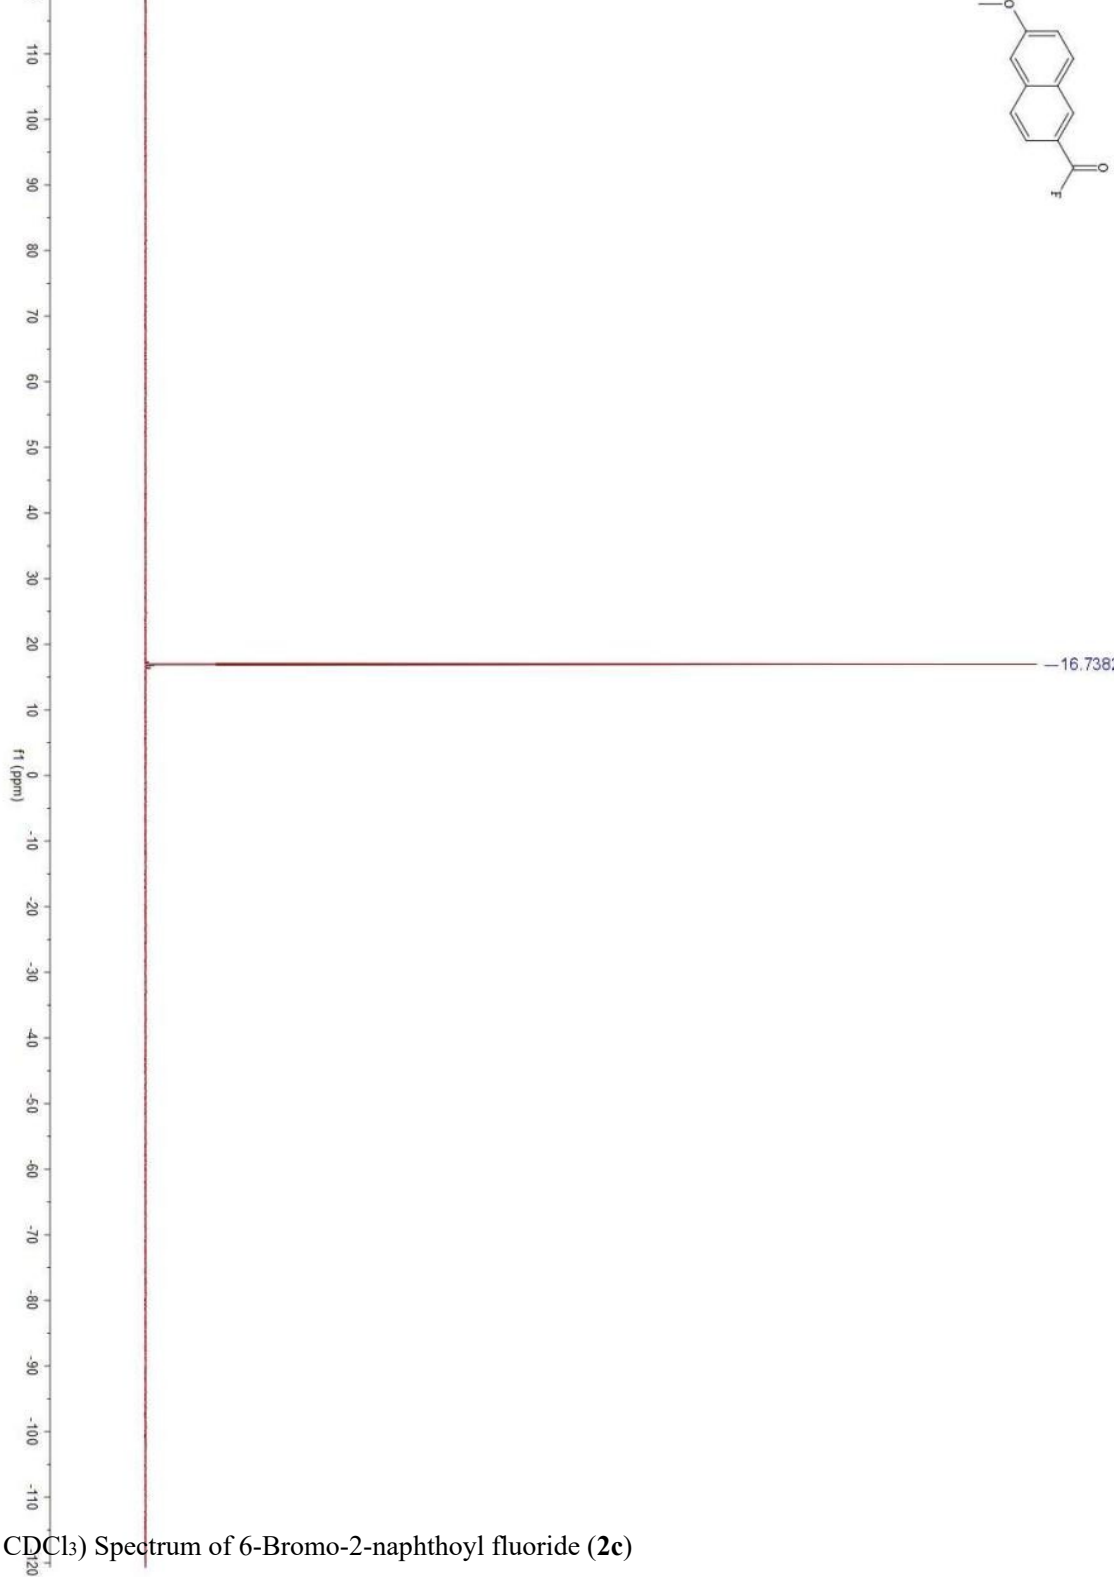

$^1\text{H}$  NMR (400 MHz,  $\text{CDCl}_3$ ) Spectrum of 6-Bromo-2-naphthoyl fluoride (**2c**)

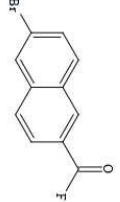

8.603

8.1024  
8.0984  
7.8783  
7.8715  
7.8495  
7.7065  
7.7017  
7.6846  
7.6798

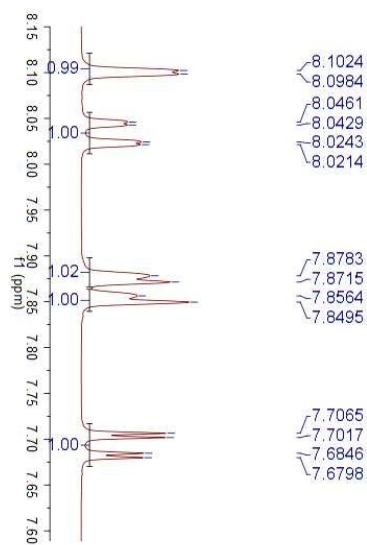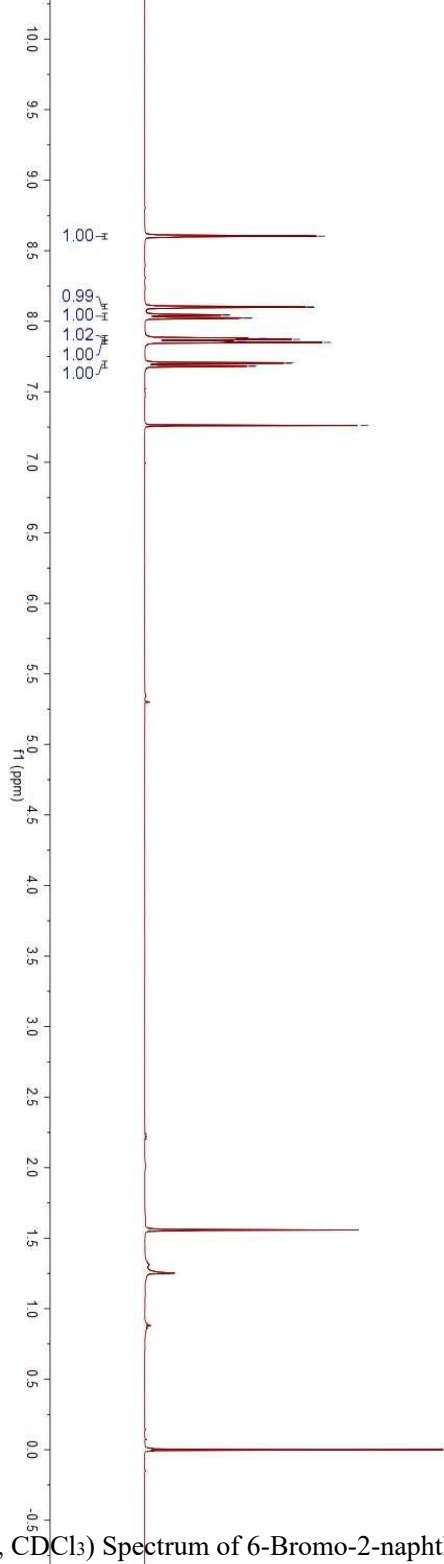

$^{13}\text{C}$  NMR (101 MHz,  $\text{CDCl}_3$ ) Spectrum of 6-Bromo-2-naphthoyl fluoride (**2c**)

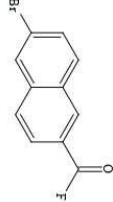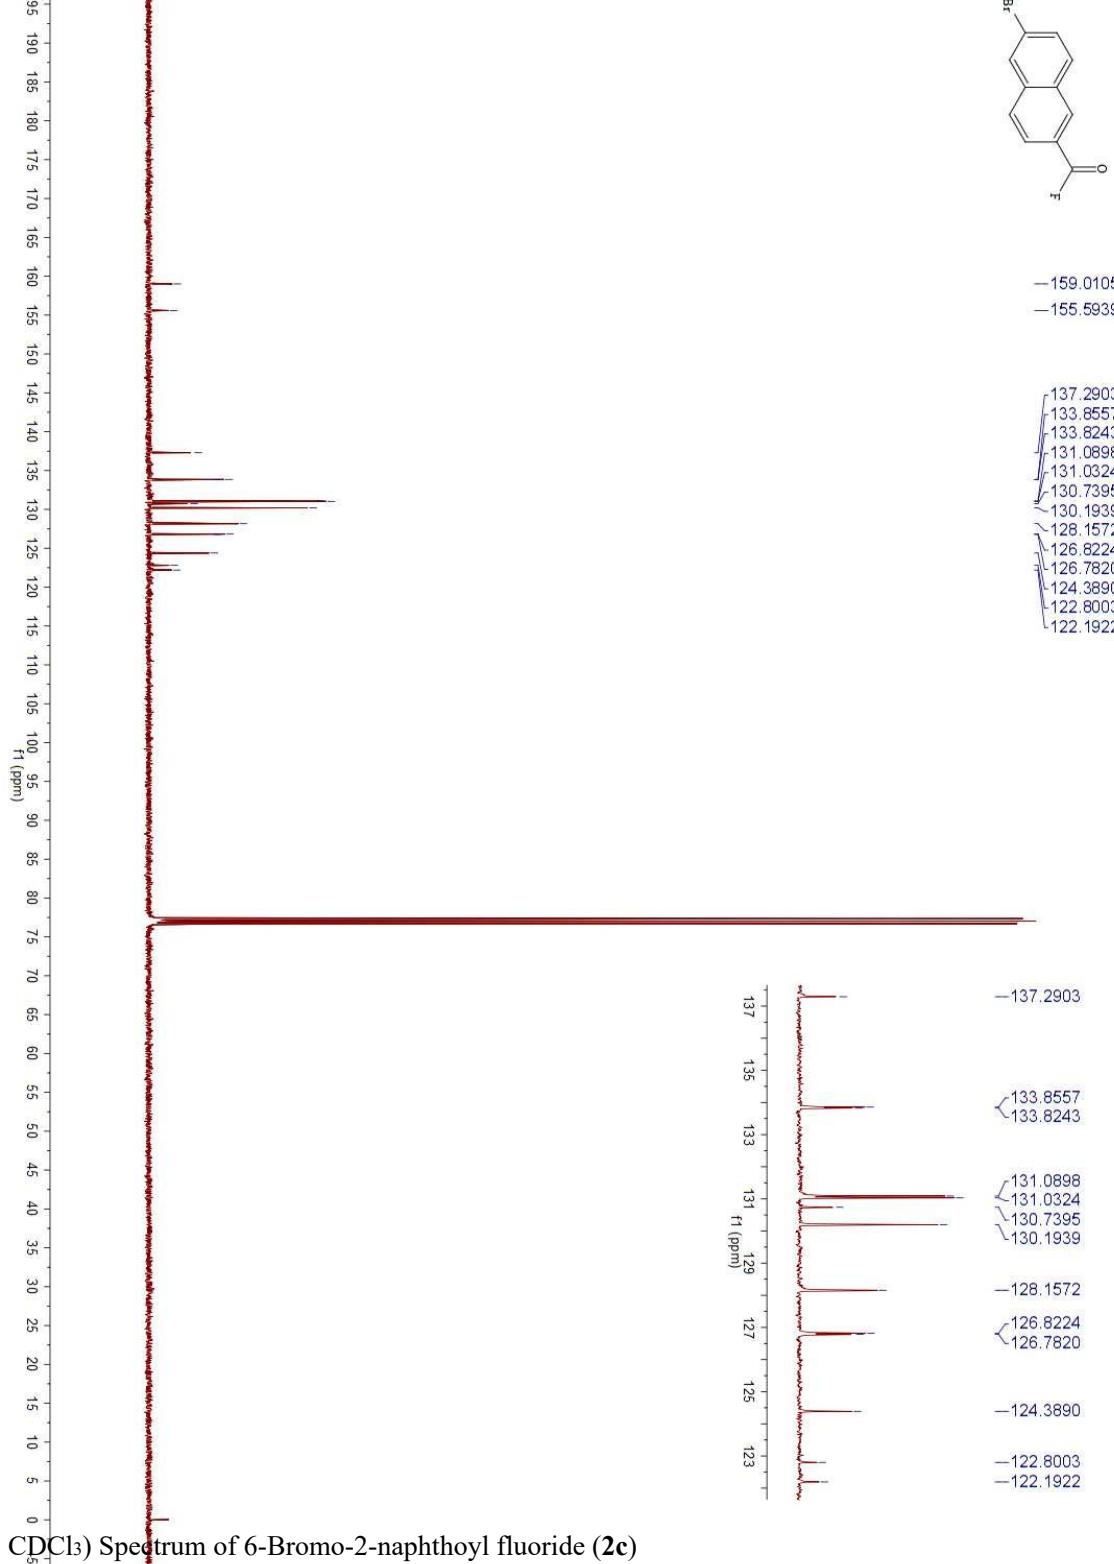

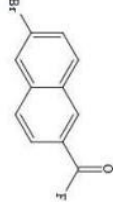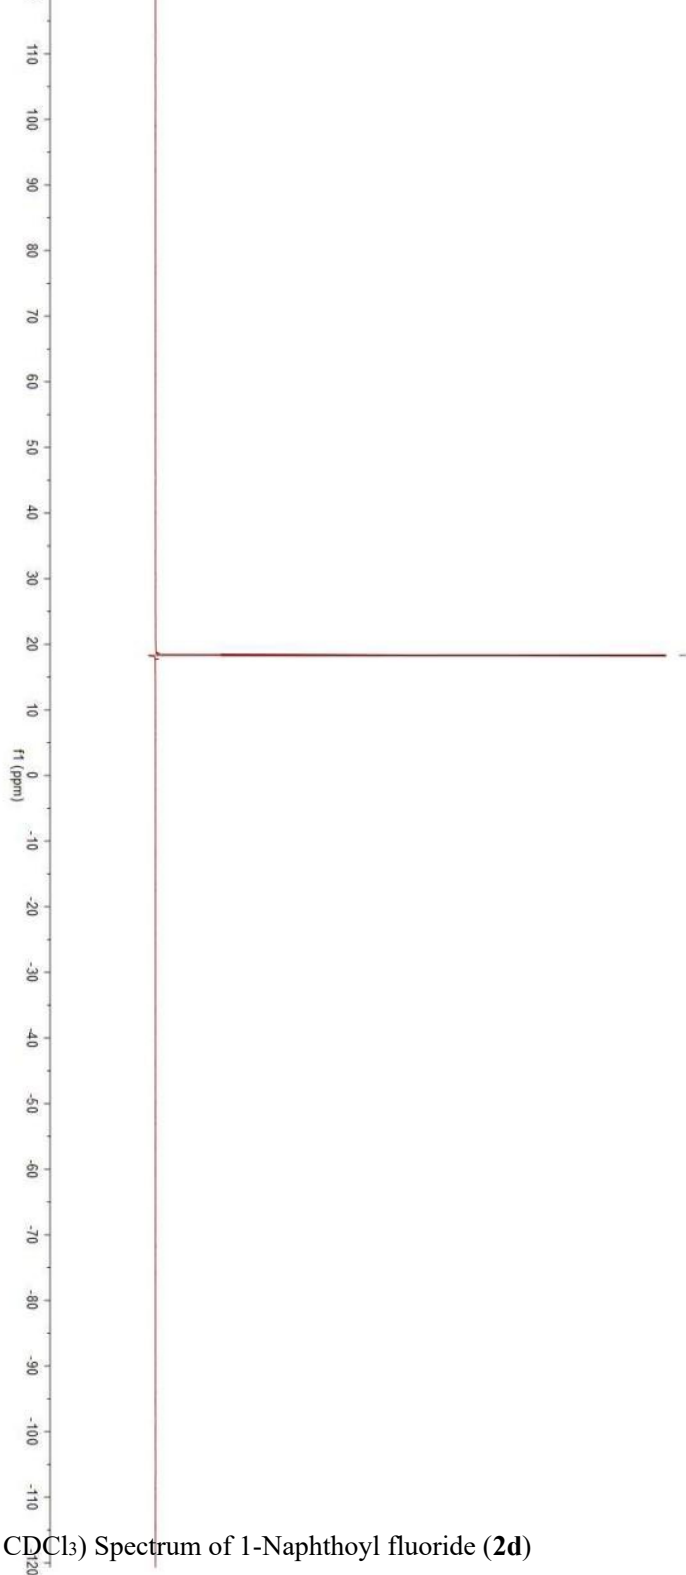

$^1\text{H}$  NMR (400 MHz,  $\text{CDCl}_3$ ) Spectrum of 1-Naphthoyl fluoride (**2d**)

<sup>13</sup>C NMR (101 MHz, CDCl<sub>3</sub>) Spectrum of 1-Naphthoyl fluoride (**2d**)

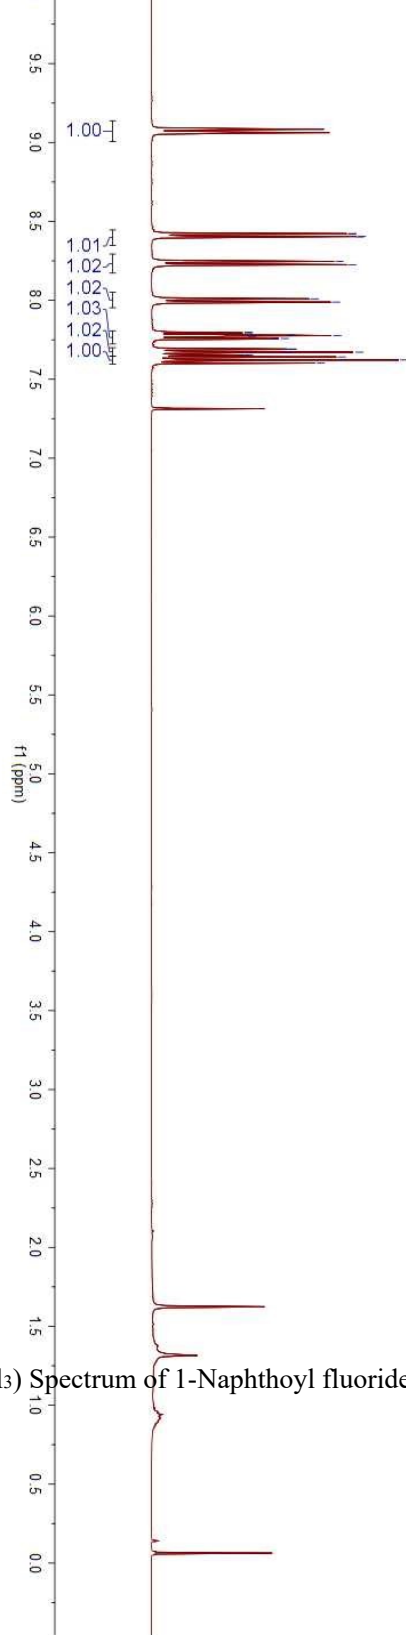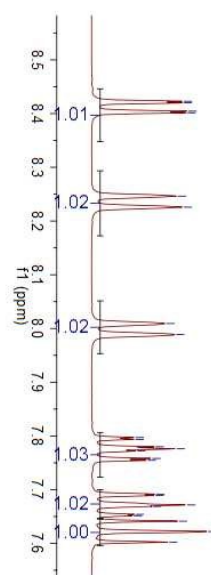

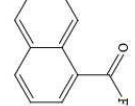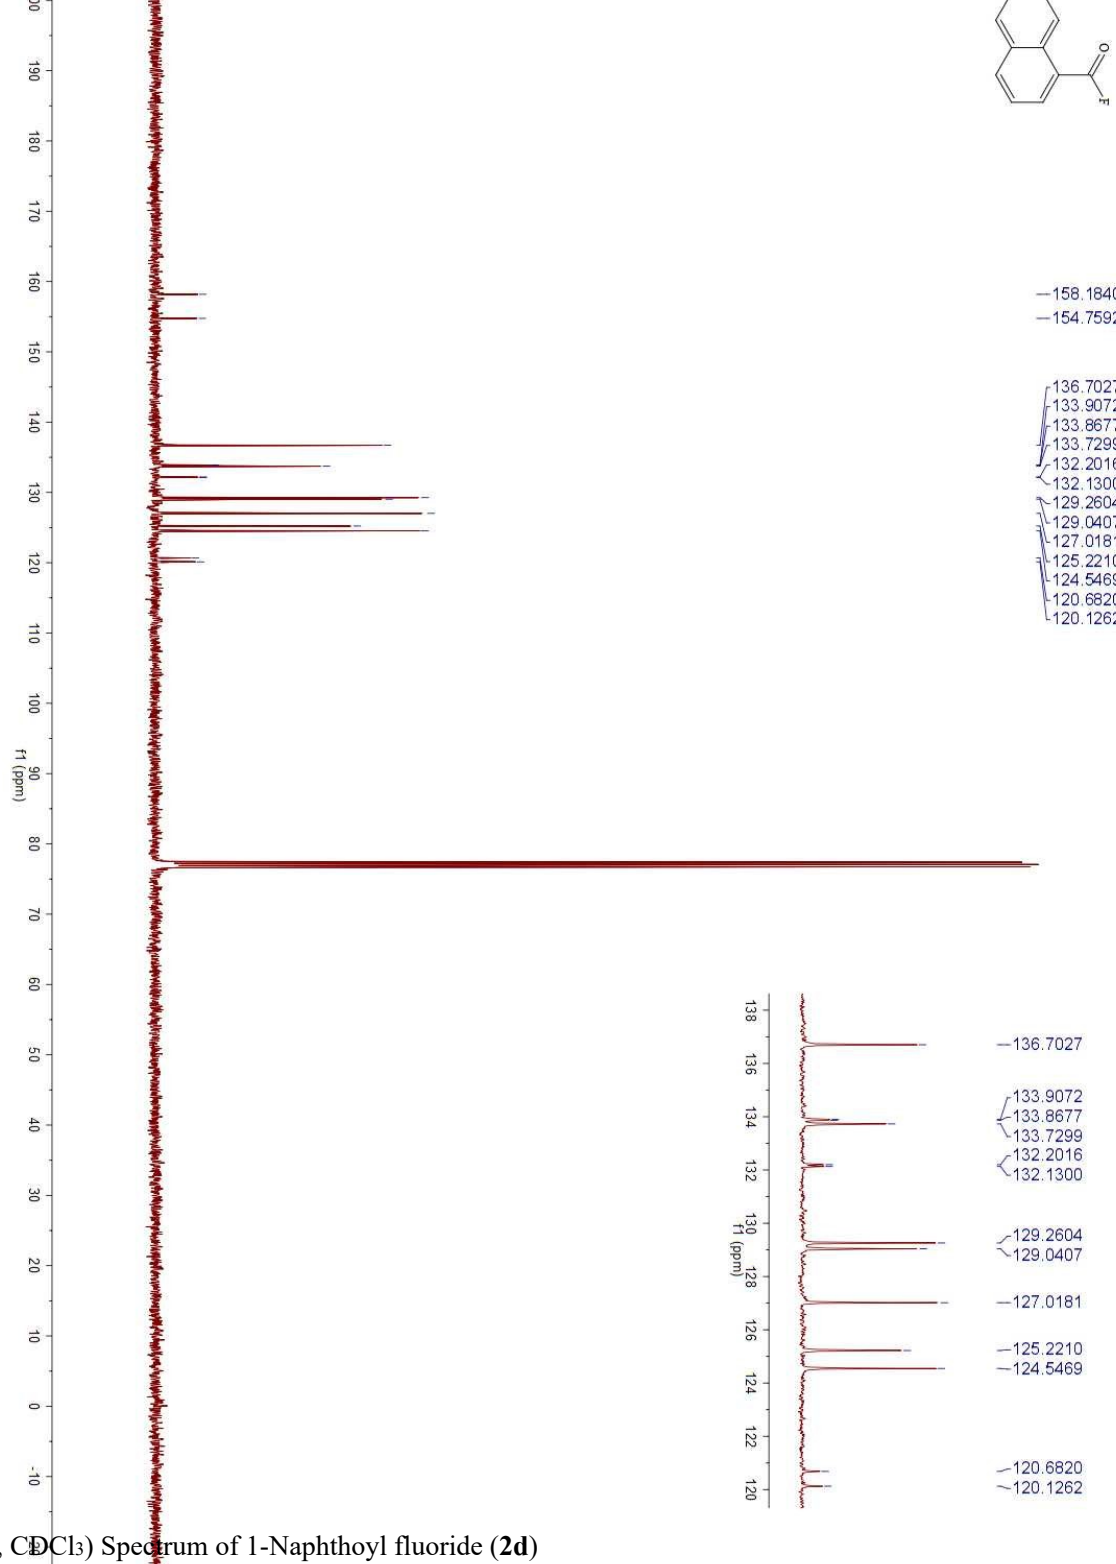

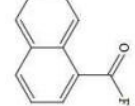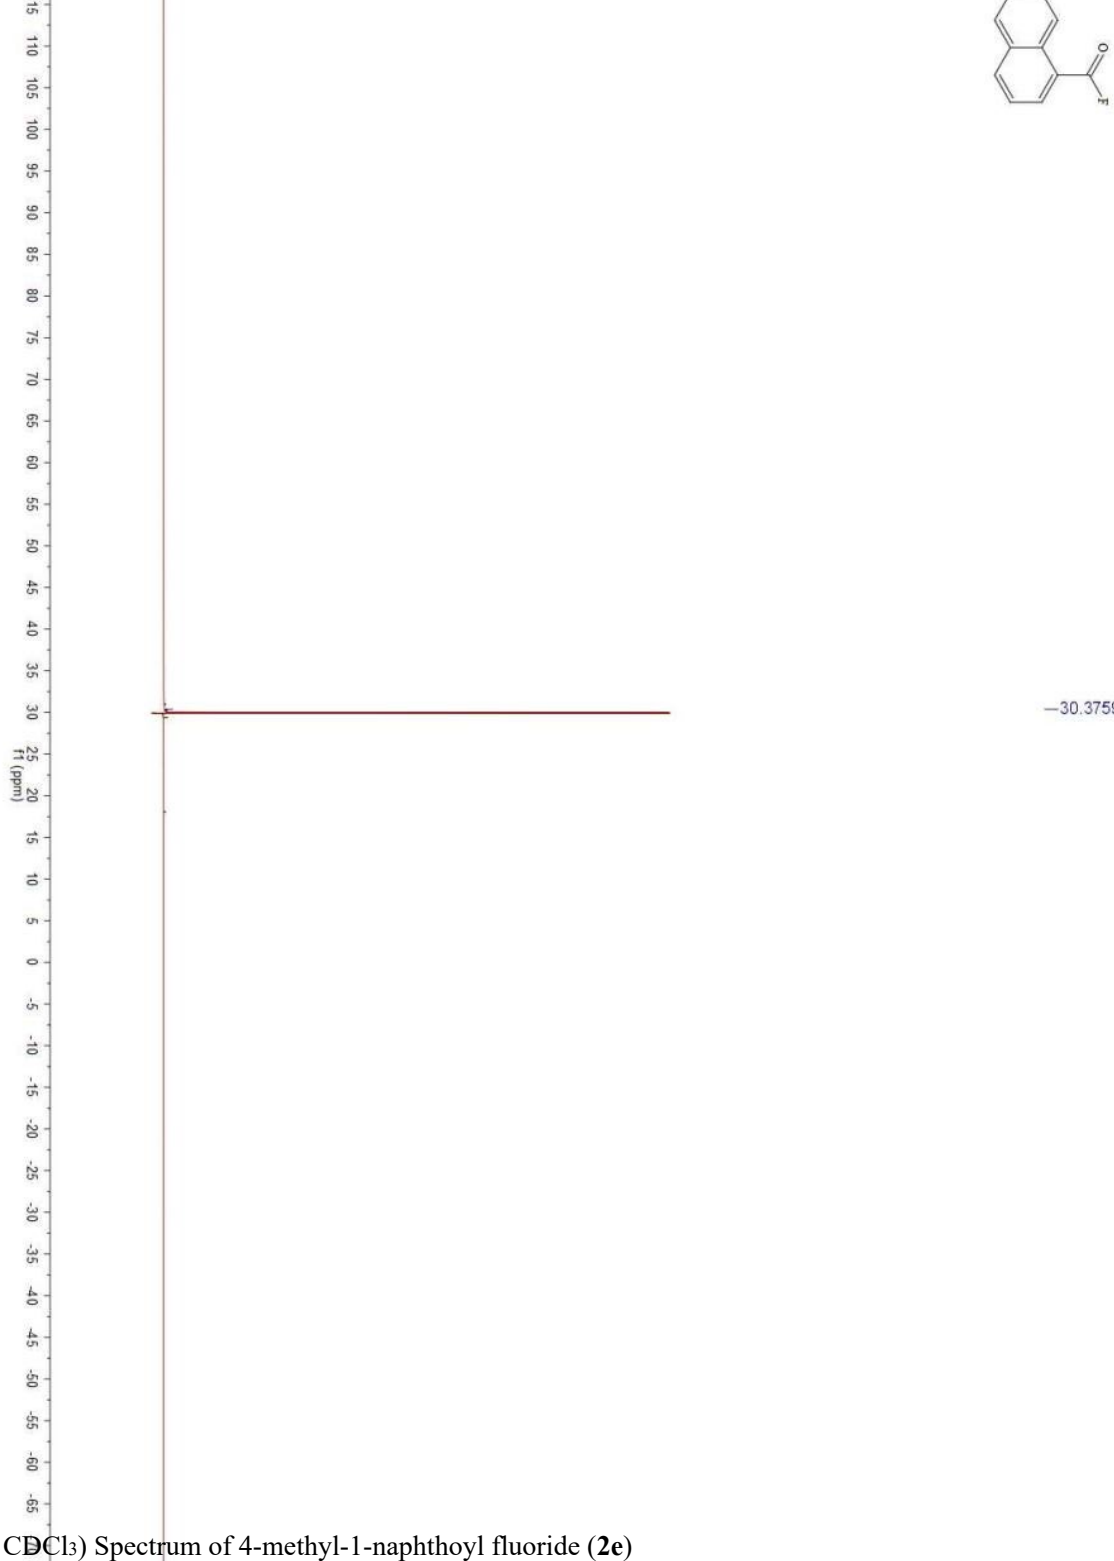

$^1\text{H}$  NMR (400 MHz,  $\text{CDCl}_3$ ) Spectrum of 4-methyl-1-naphthoyl fluoride (**2e**)

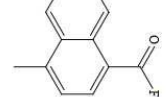

$^{13}\text{C}$  NMR (101 MHz,  $\text{CDCl}_3$ ) Spectrum of 4-methyl-1-naphthoyl fluoride (**2e**)

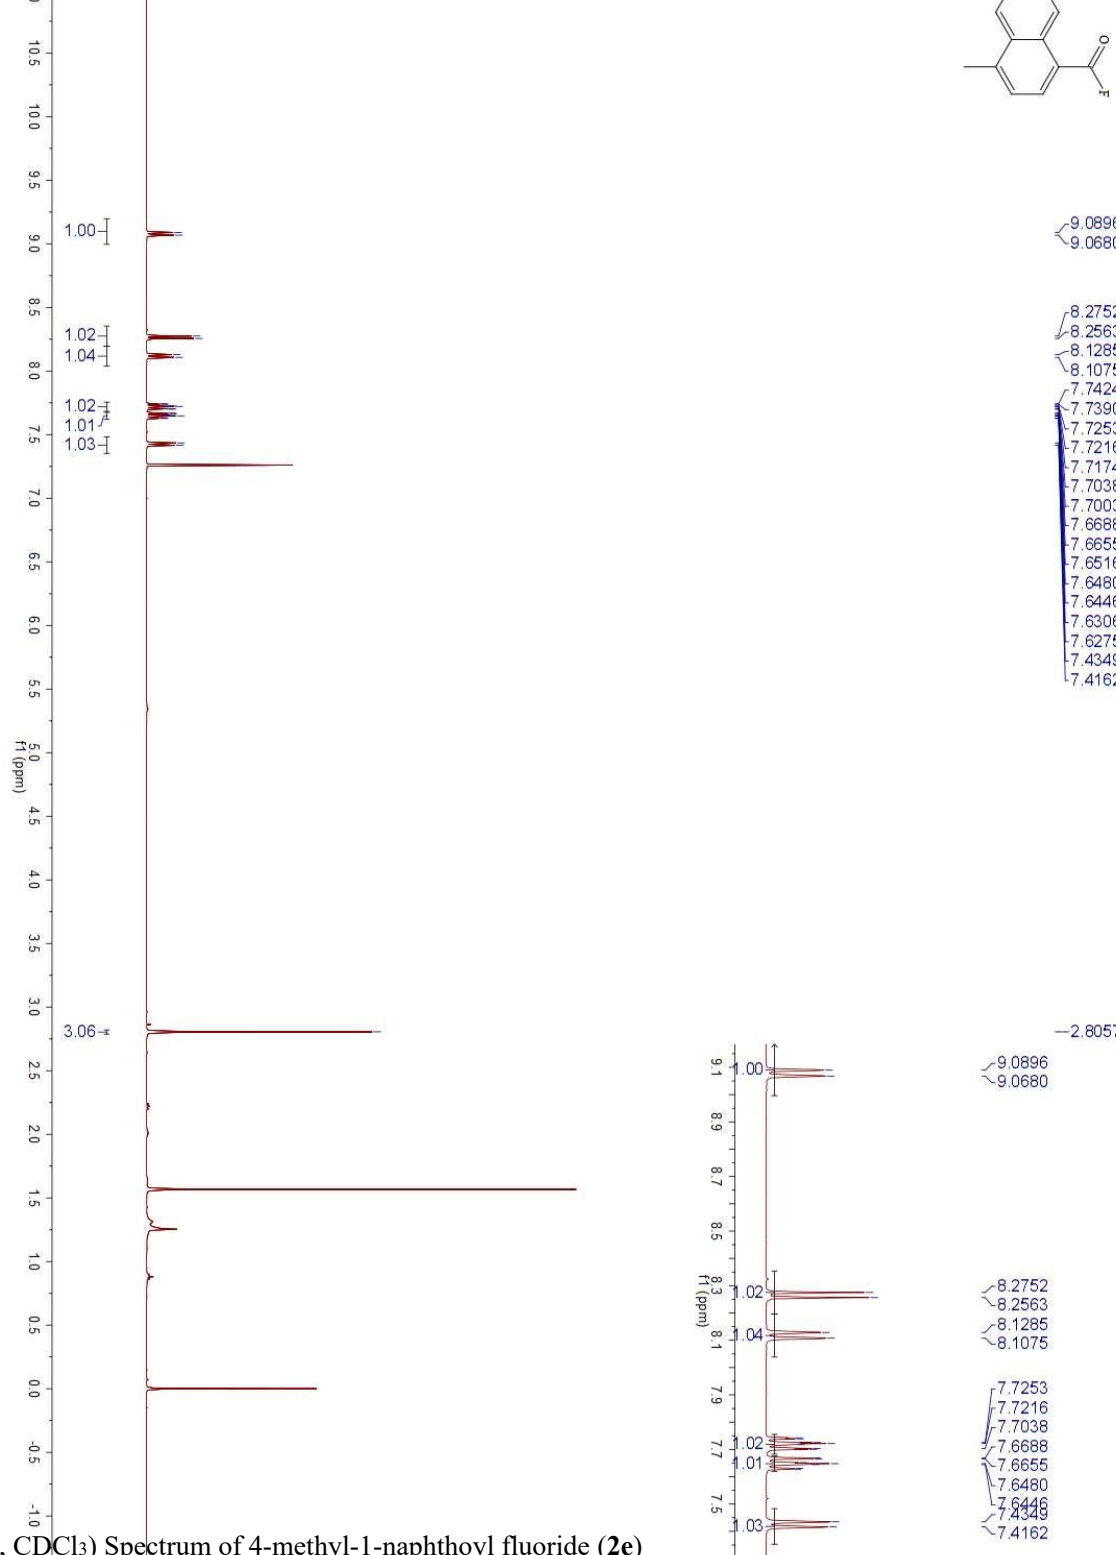



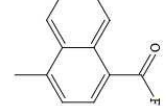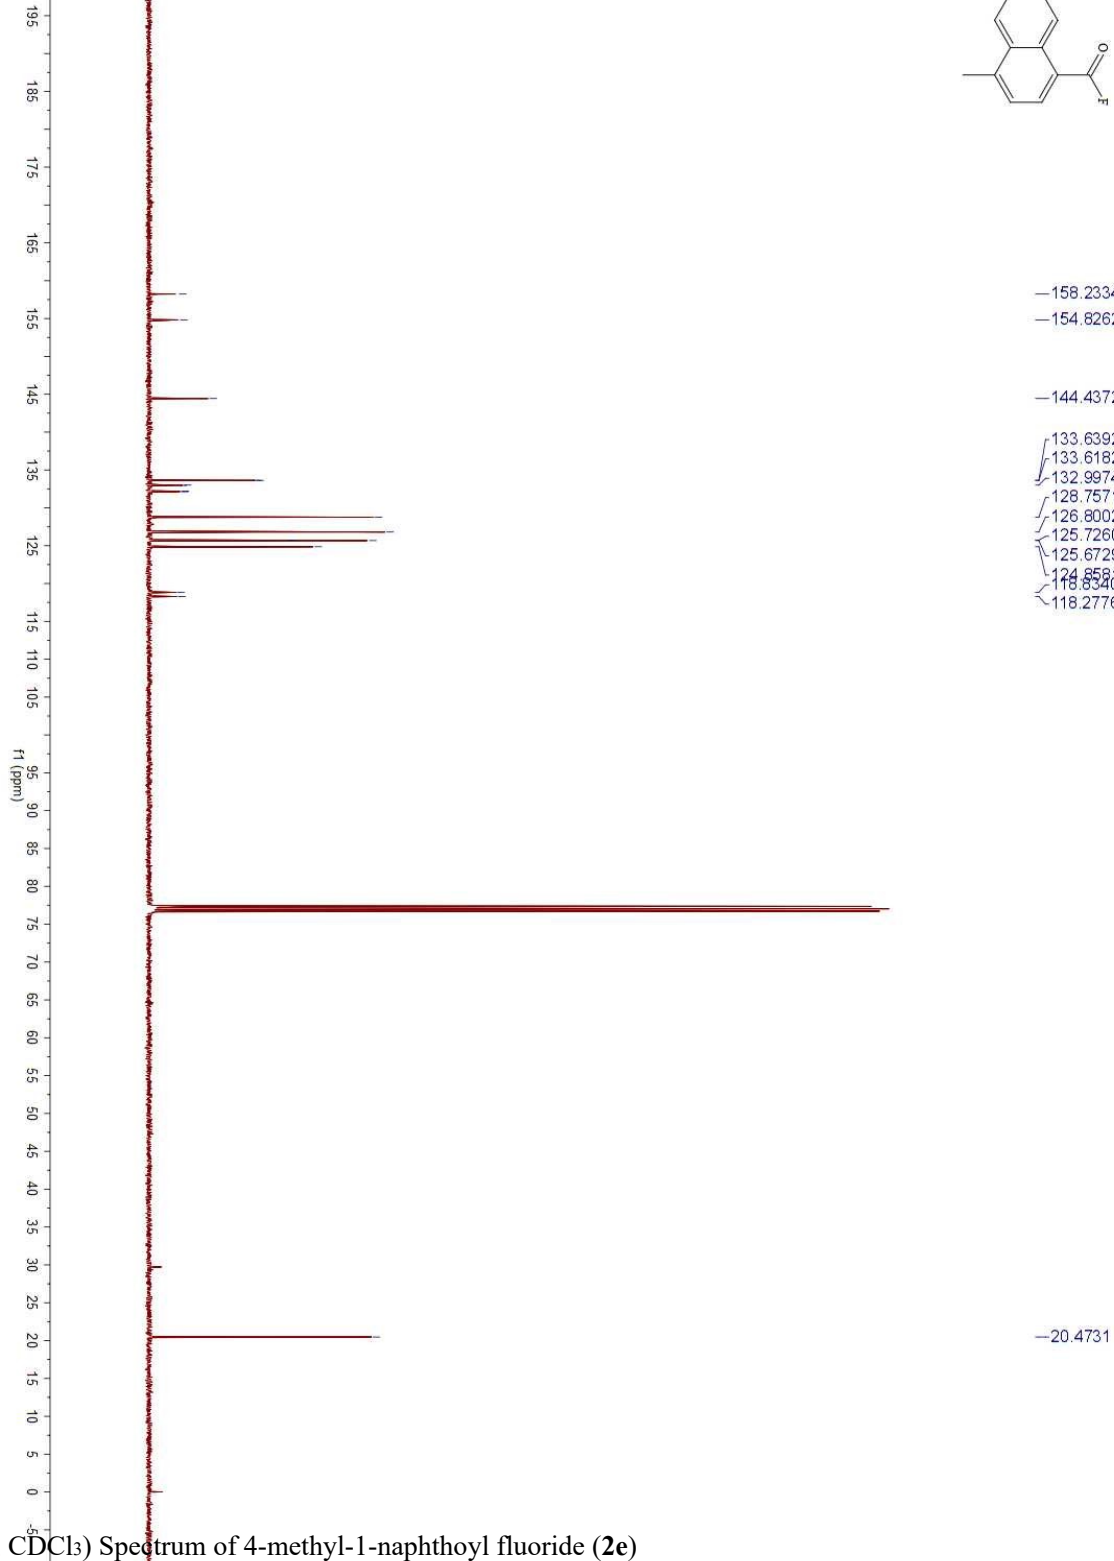

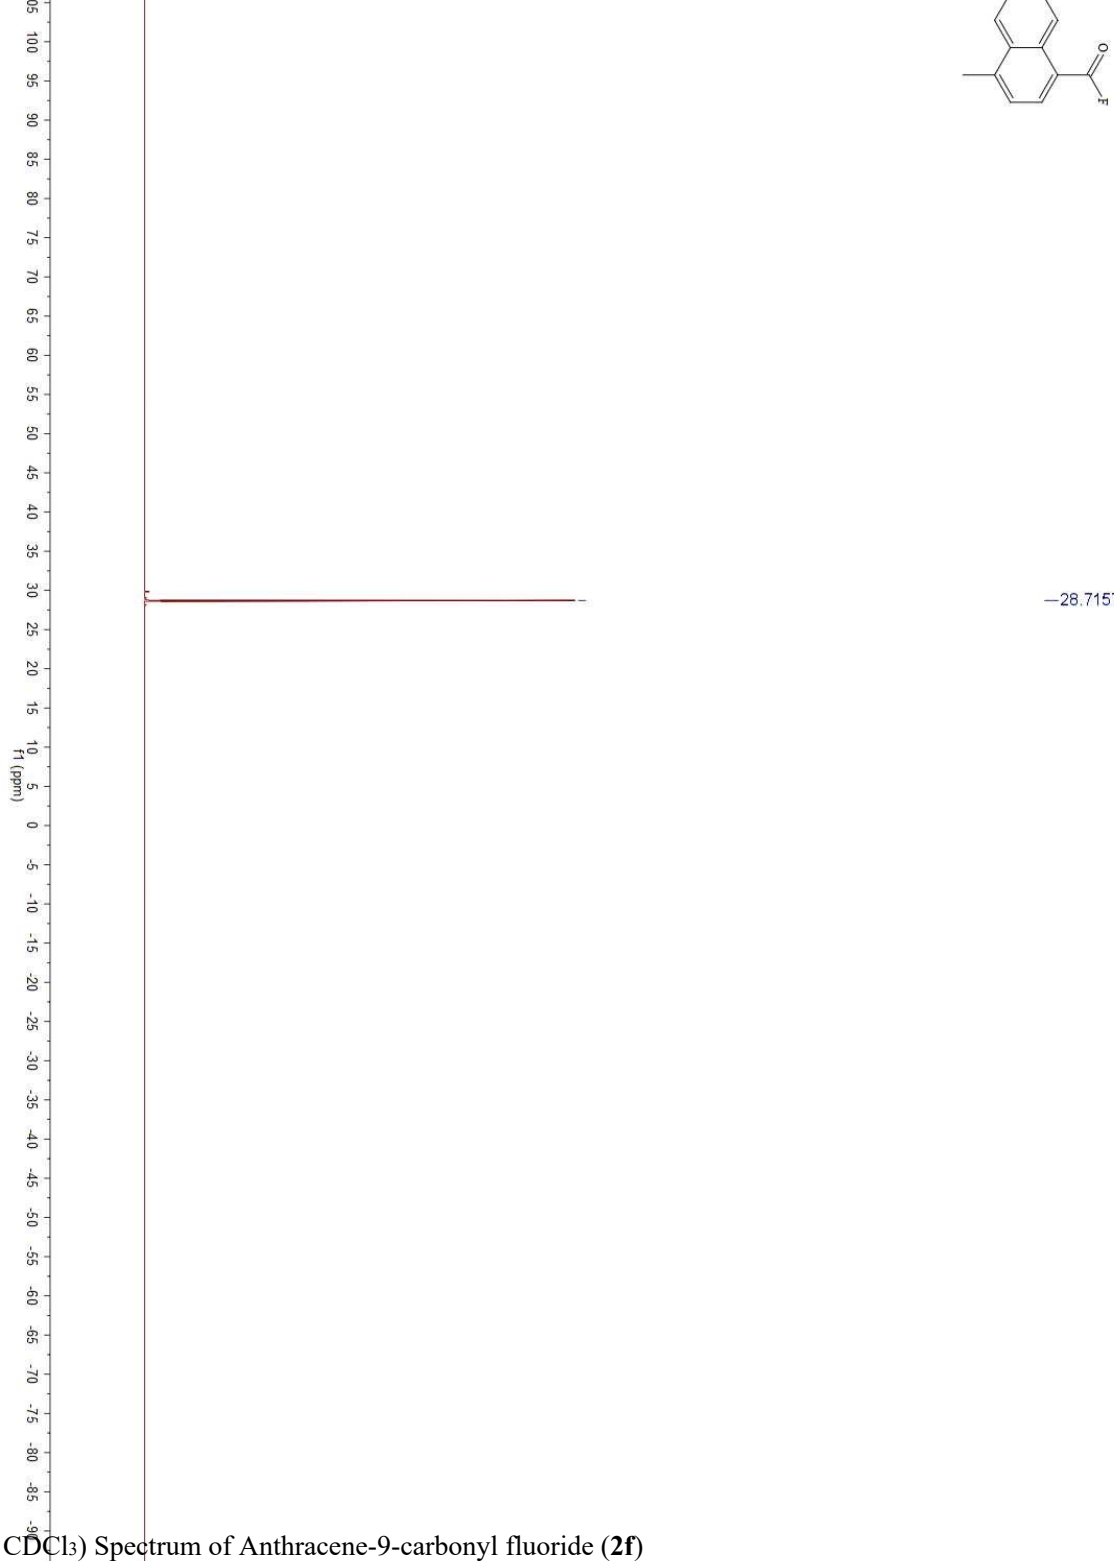

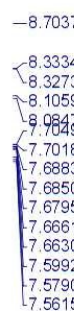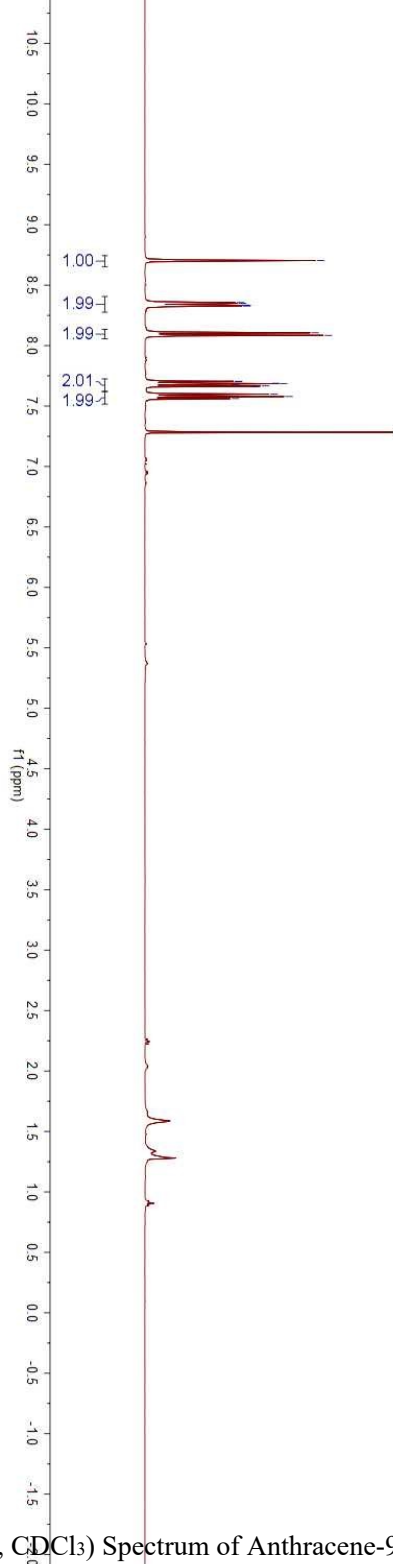

S27

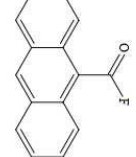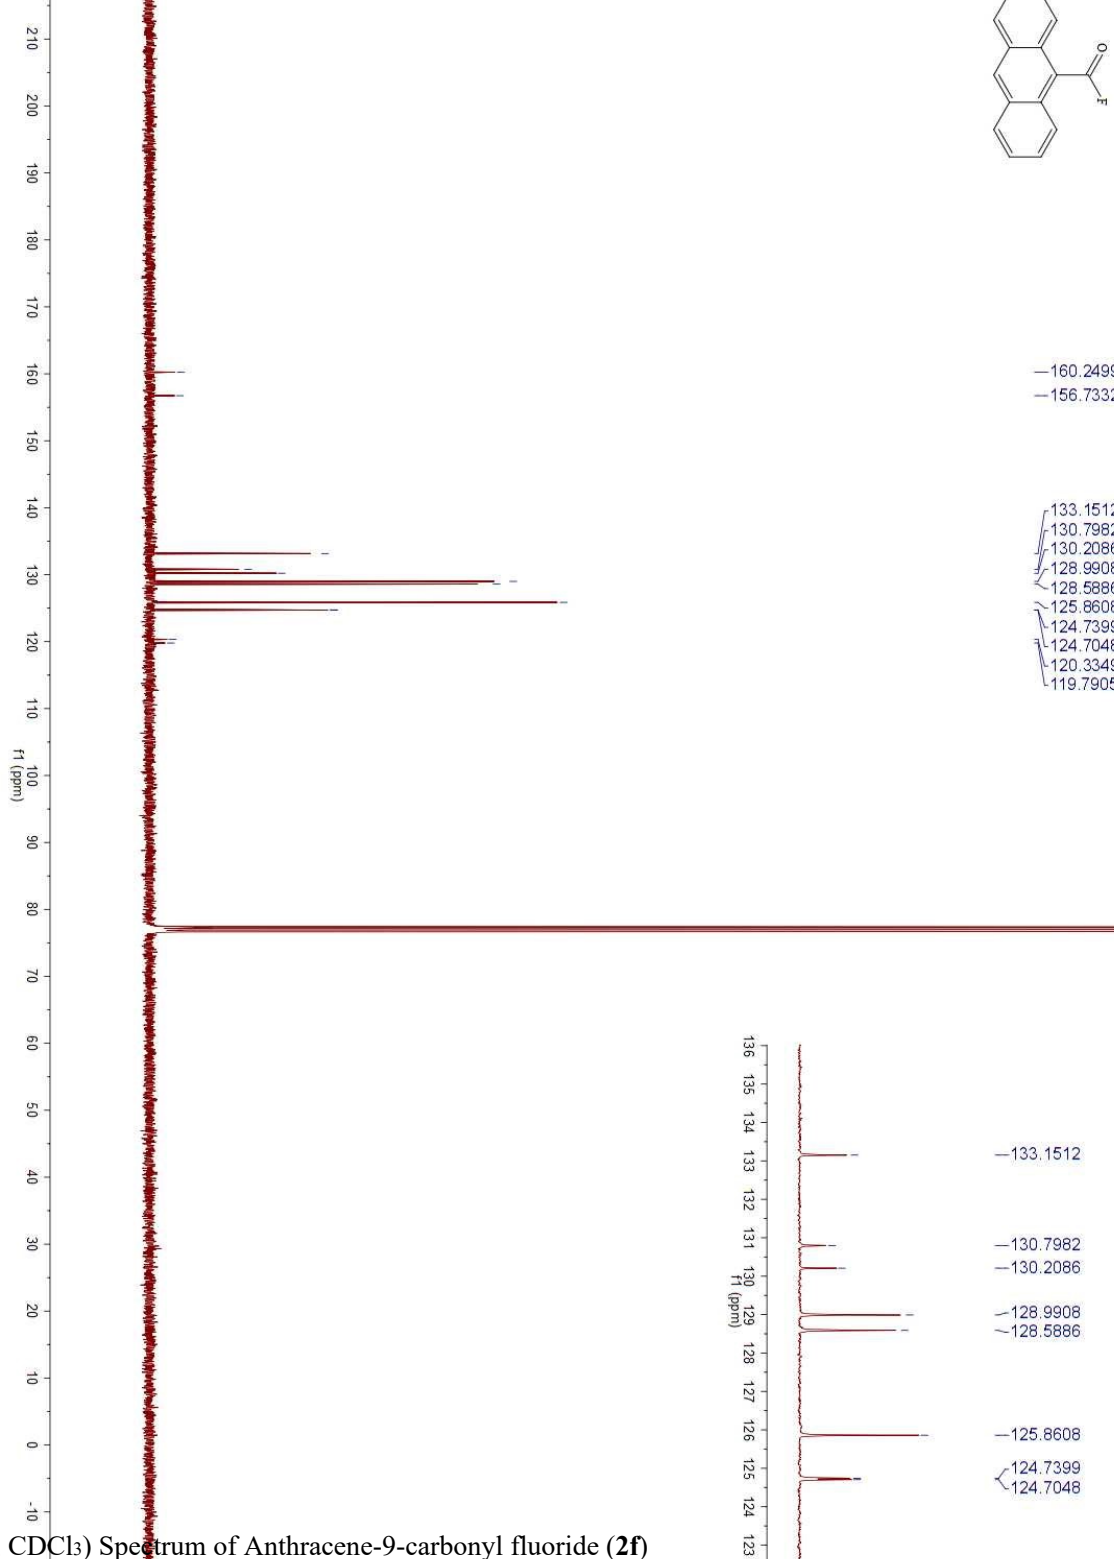

<sup>19</sup>F NMR (376 MHz, CDCl<sub>3</sub>) Spectrum of Anthracene-9-carbonyl fluoride (**2f**)

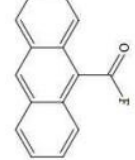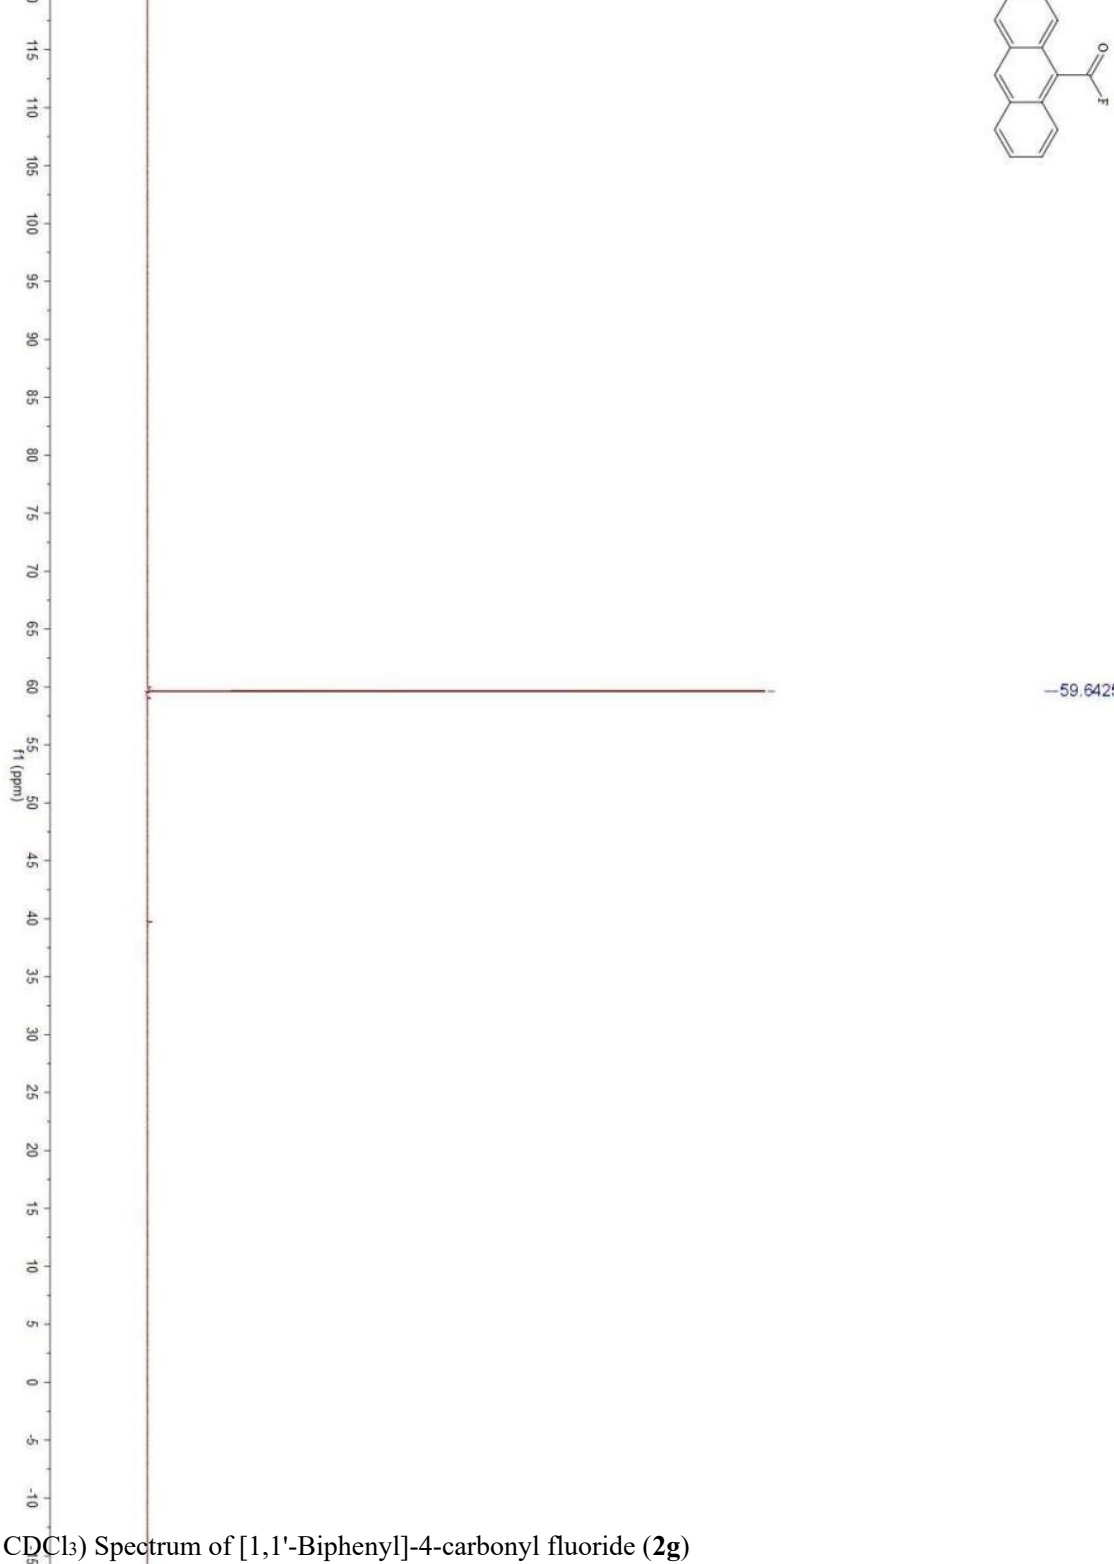

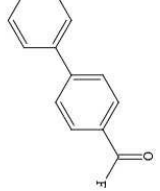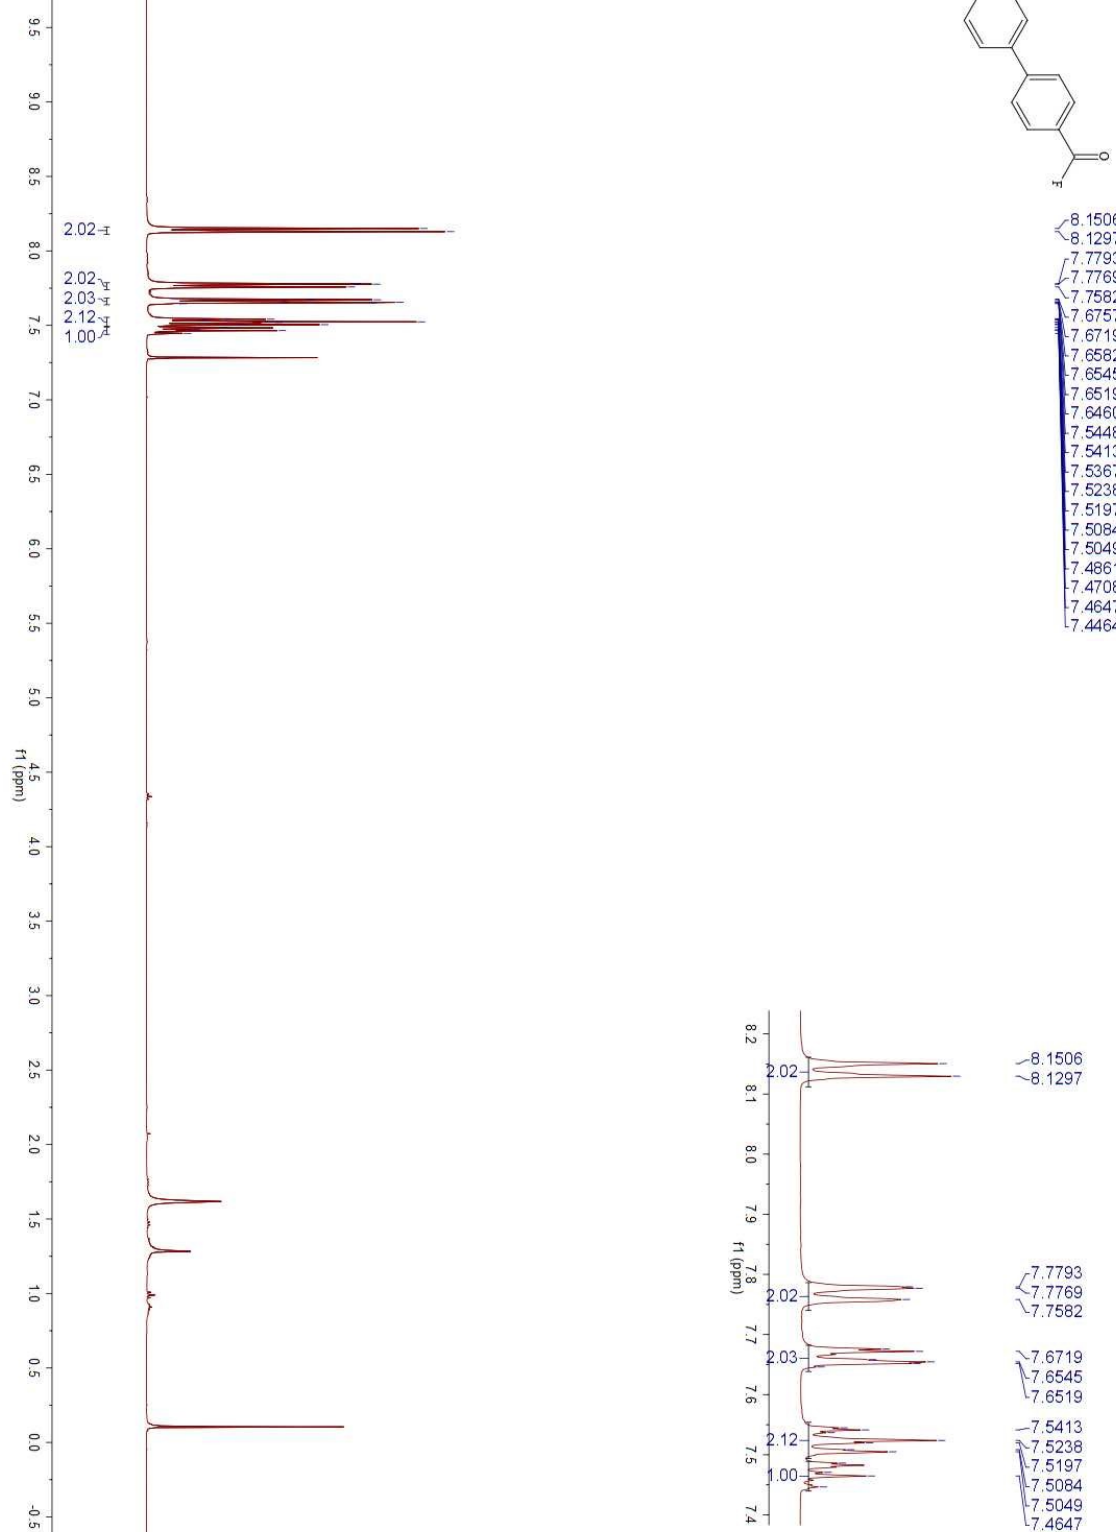

$^{13}\text{C}$  NMR (101 MHz,  $\text{CDCl}_3$ ) Spectrum of [1,1'-Biphenyl]-4-carbonyl fluoride (**2g**)

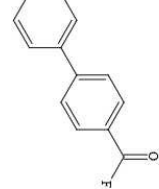

-158.070  
 -154.659  
 -147.082  
 -138.232  
 130.9778  
 130.9393  
 128.0747  
 127.7584  
 126.6416  
 126.3390  
 122.7496  
 122.1409

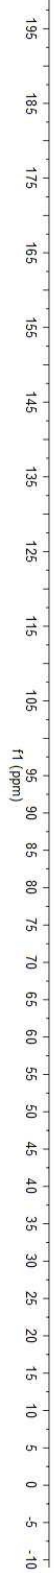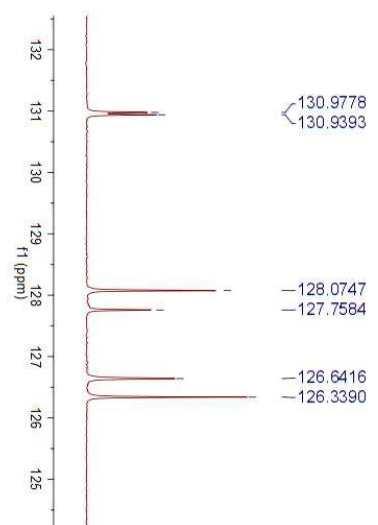

$^{19}\text{F}$  NMR (376 MHz,

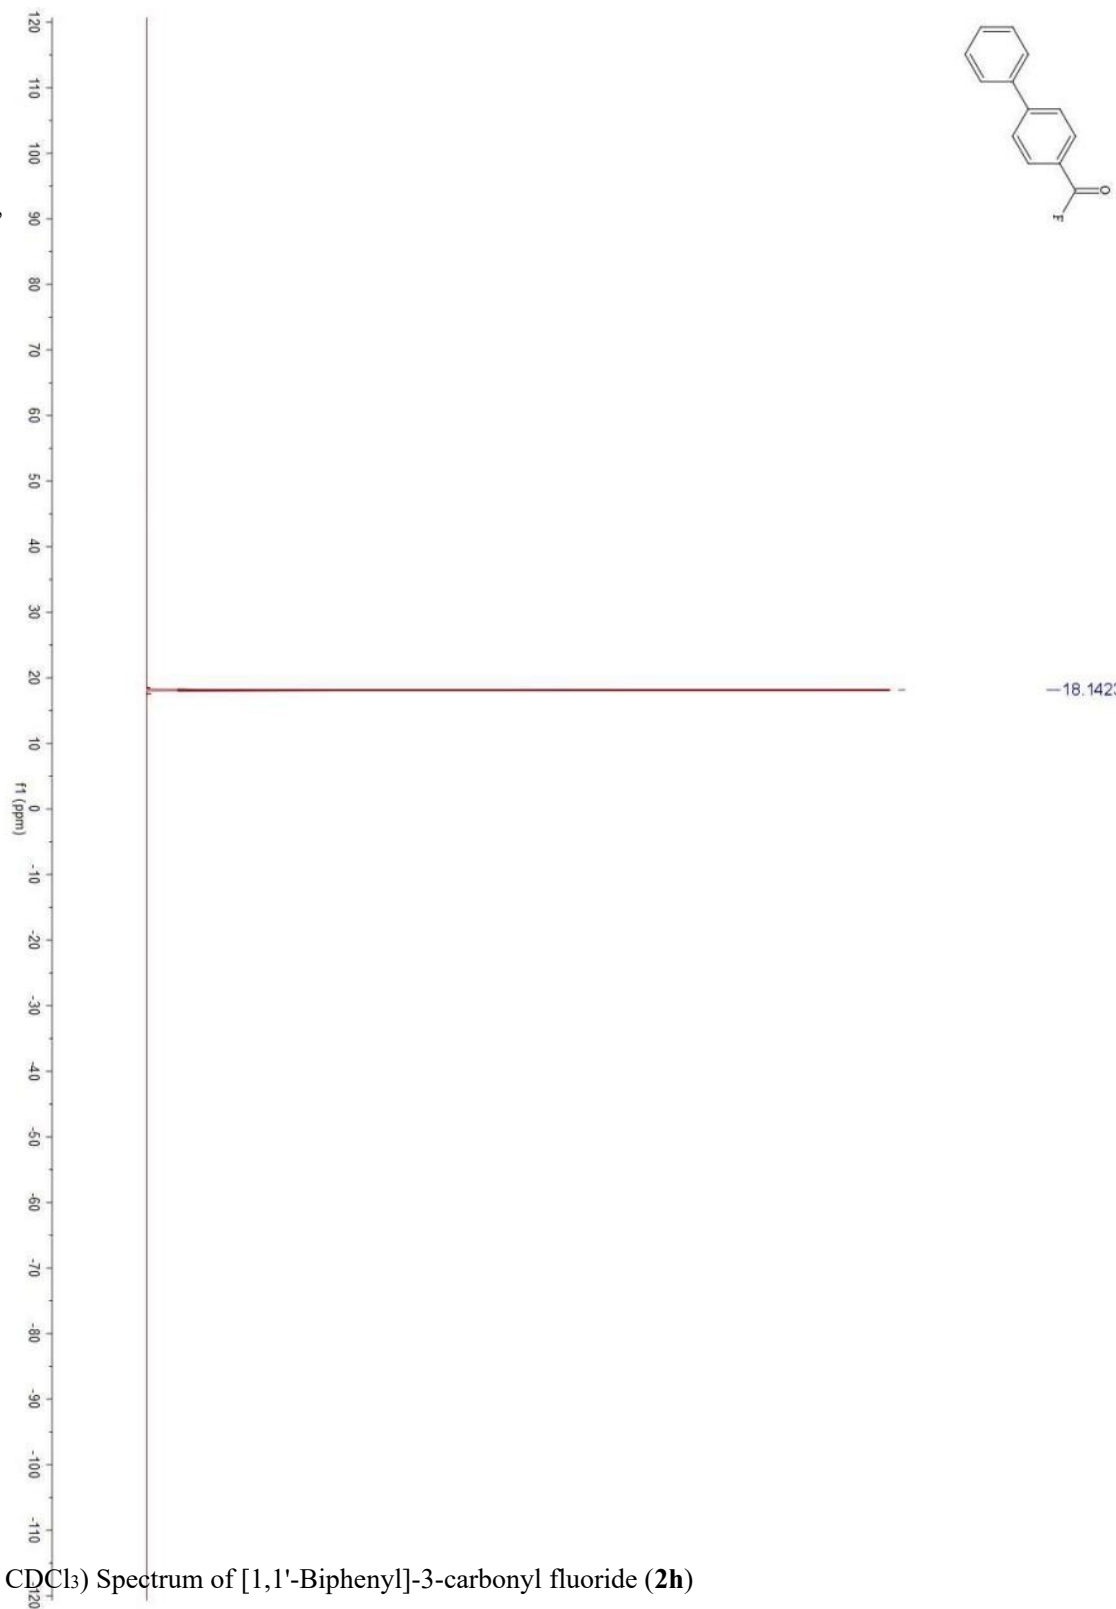

$^1\text{H}$  NMR (400 MHz,  $\text{CDCl}_3$ ) Spectrum of [1,1'-Biphenyl]-3-carbonyl fluoride (**2h**)



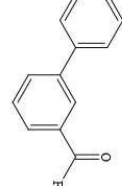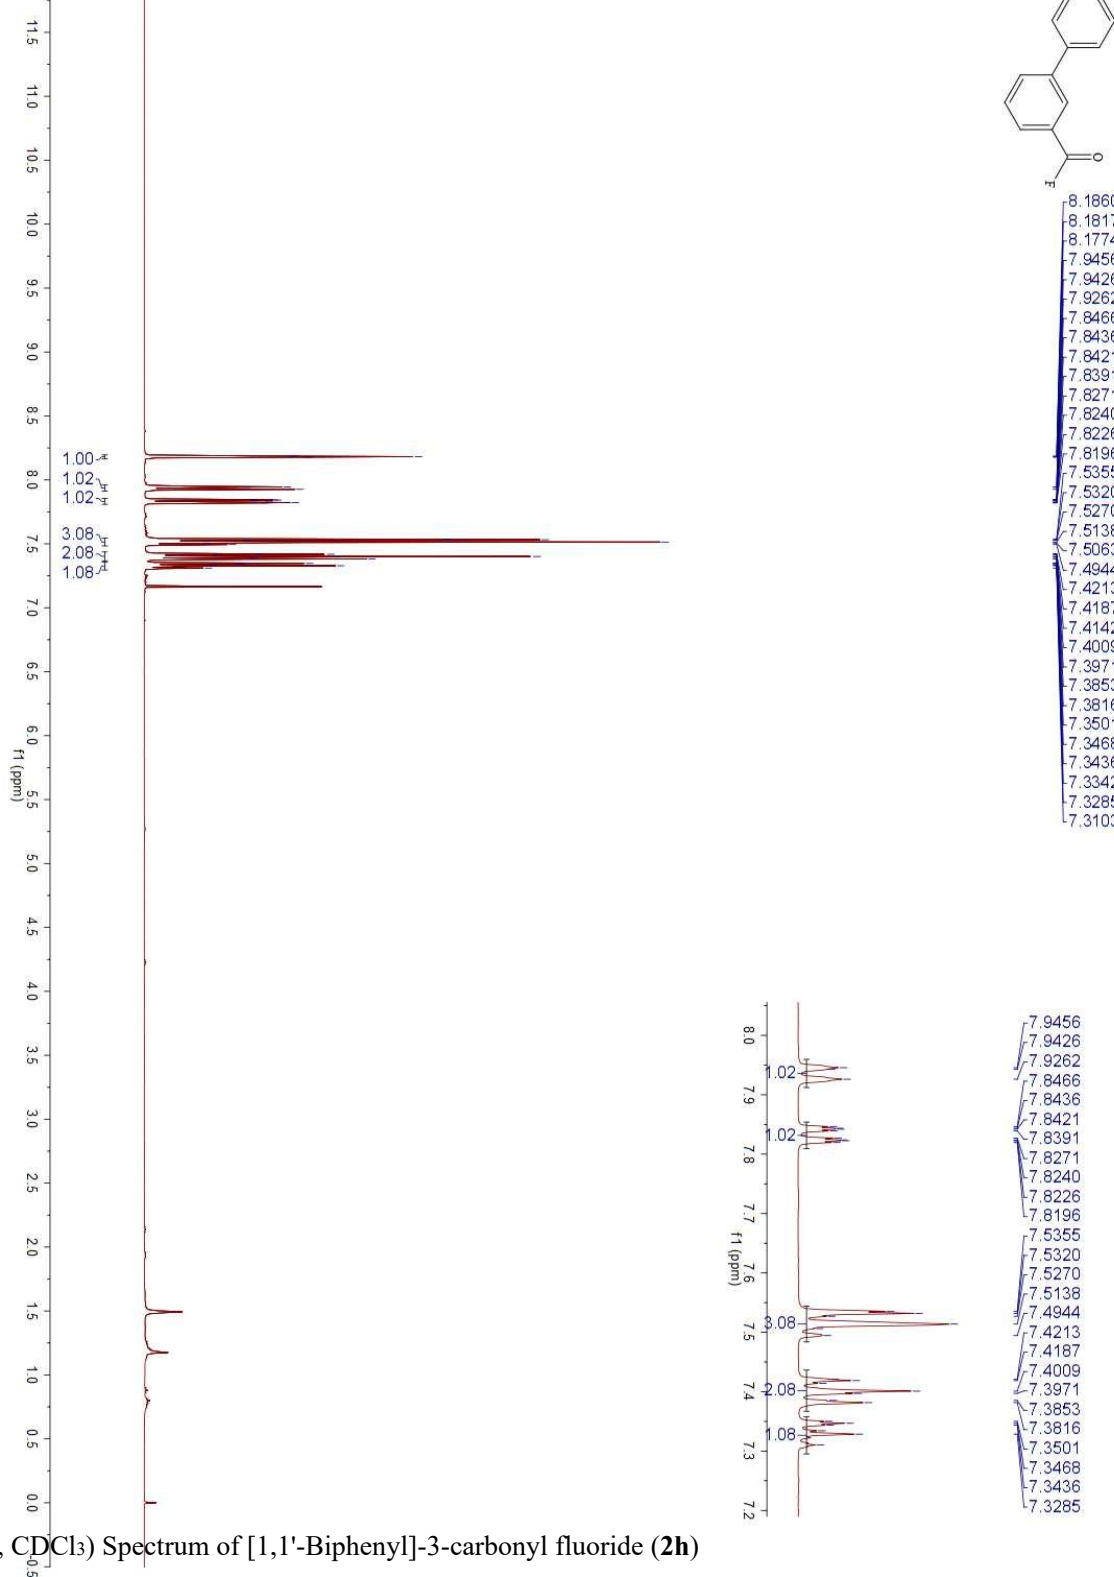

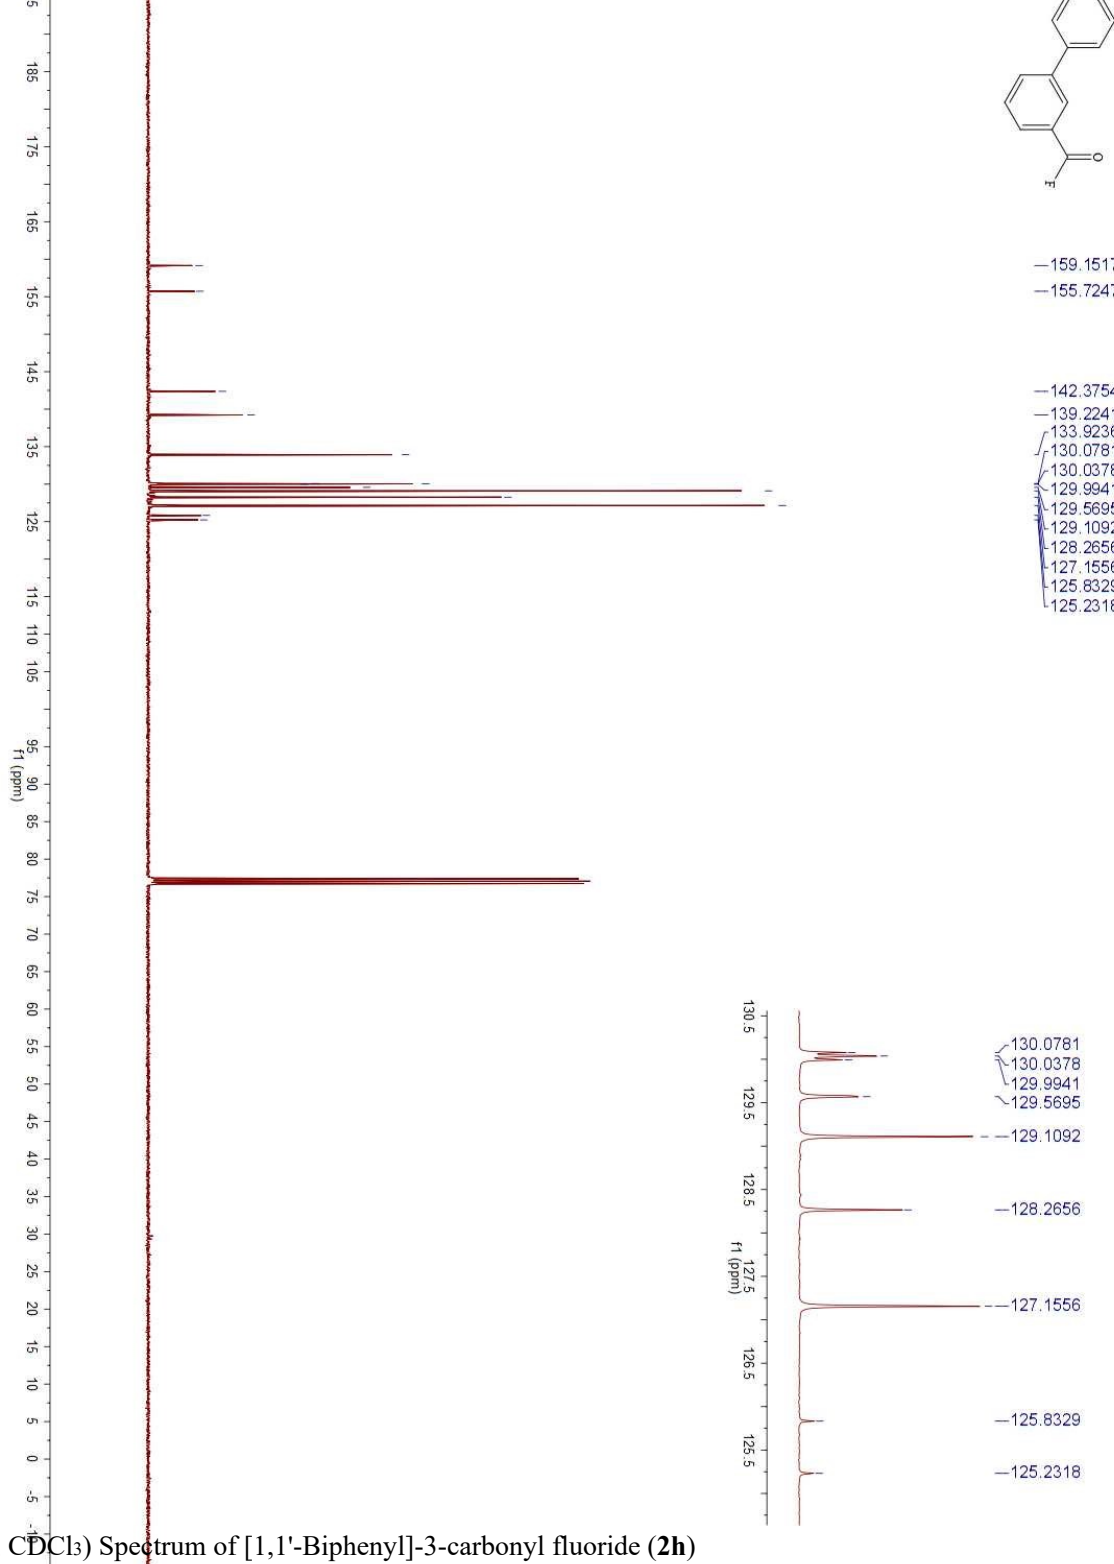

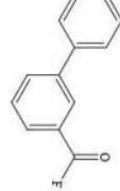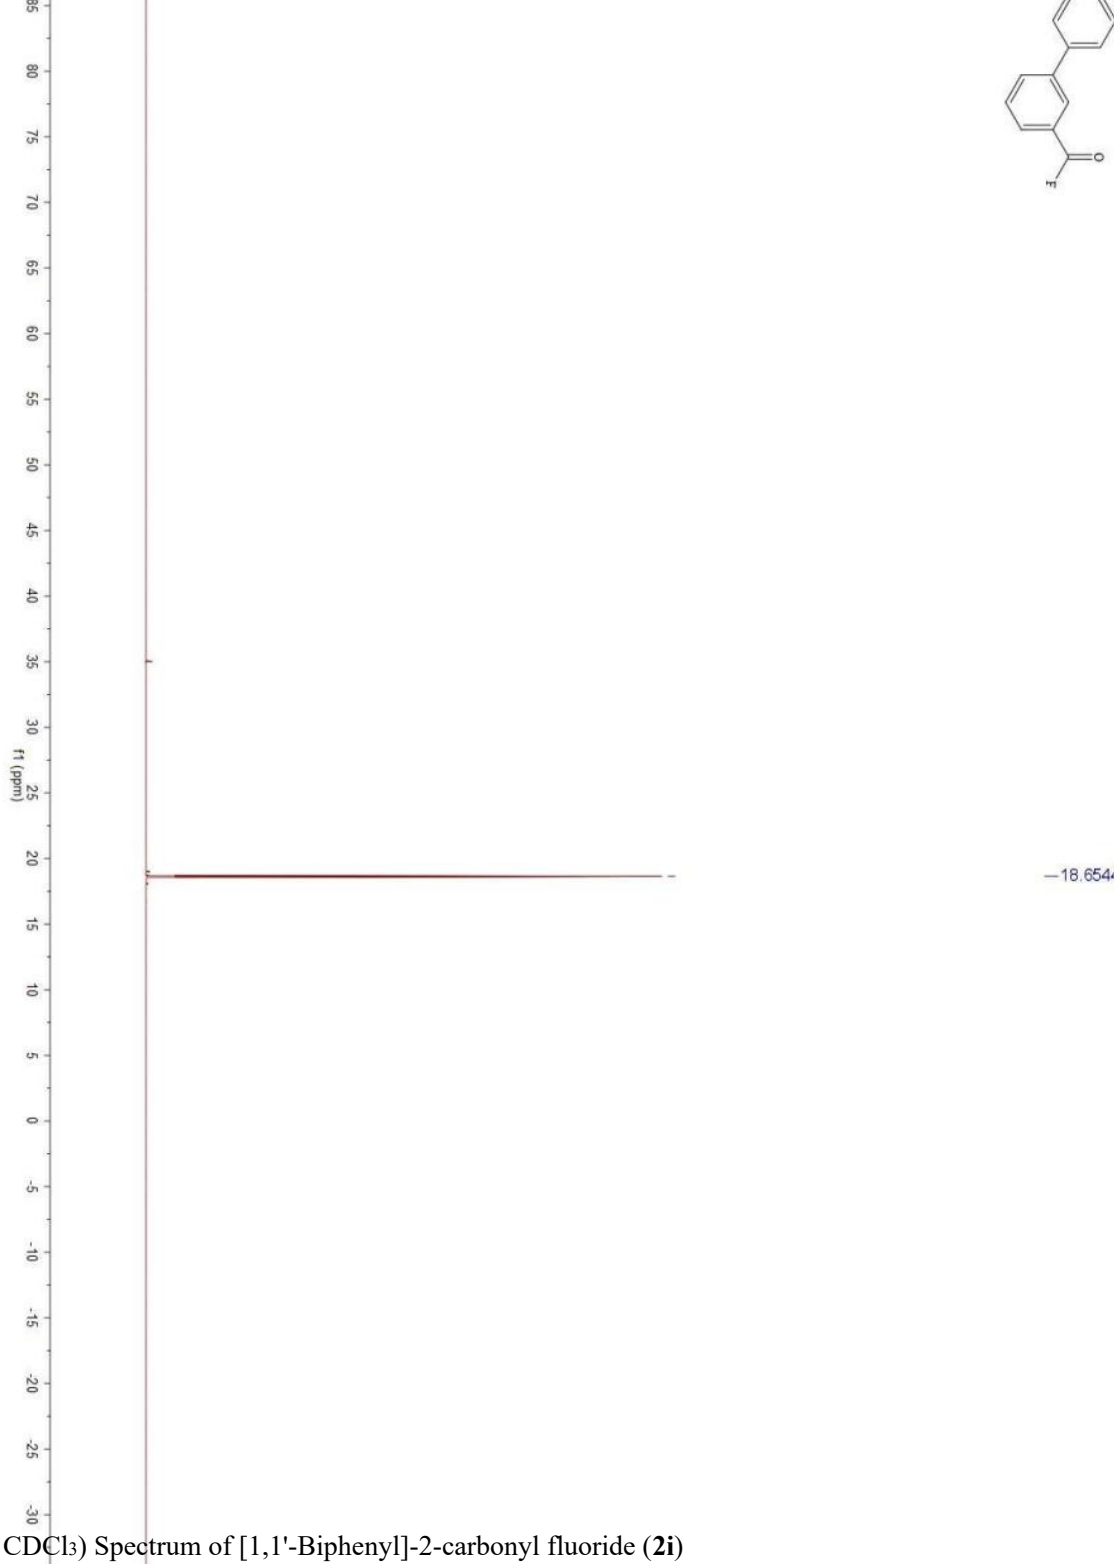

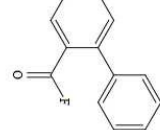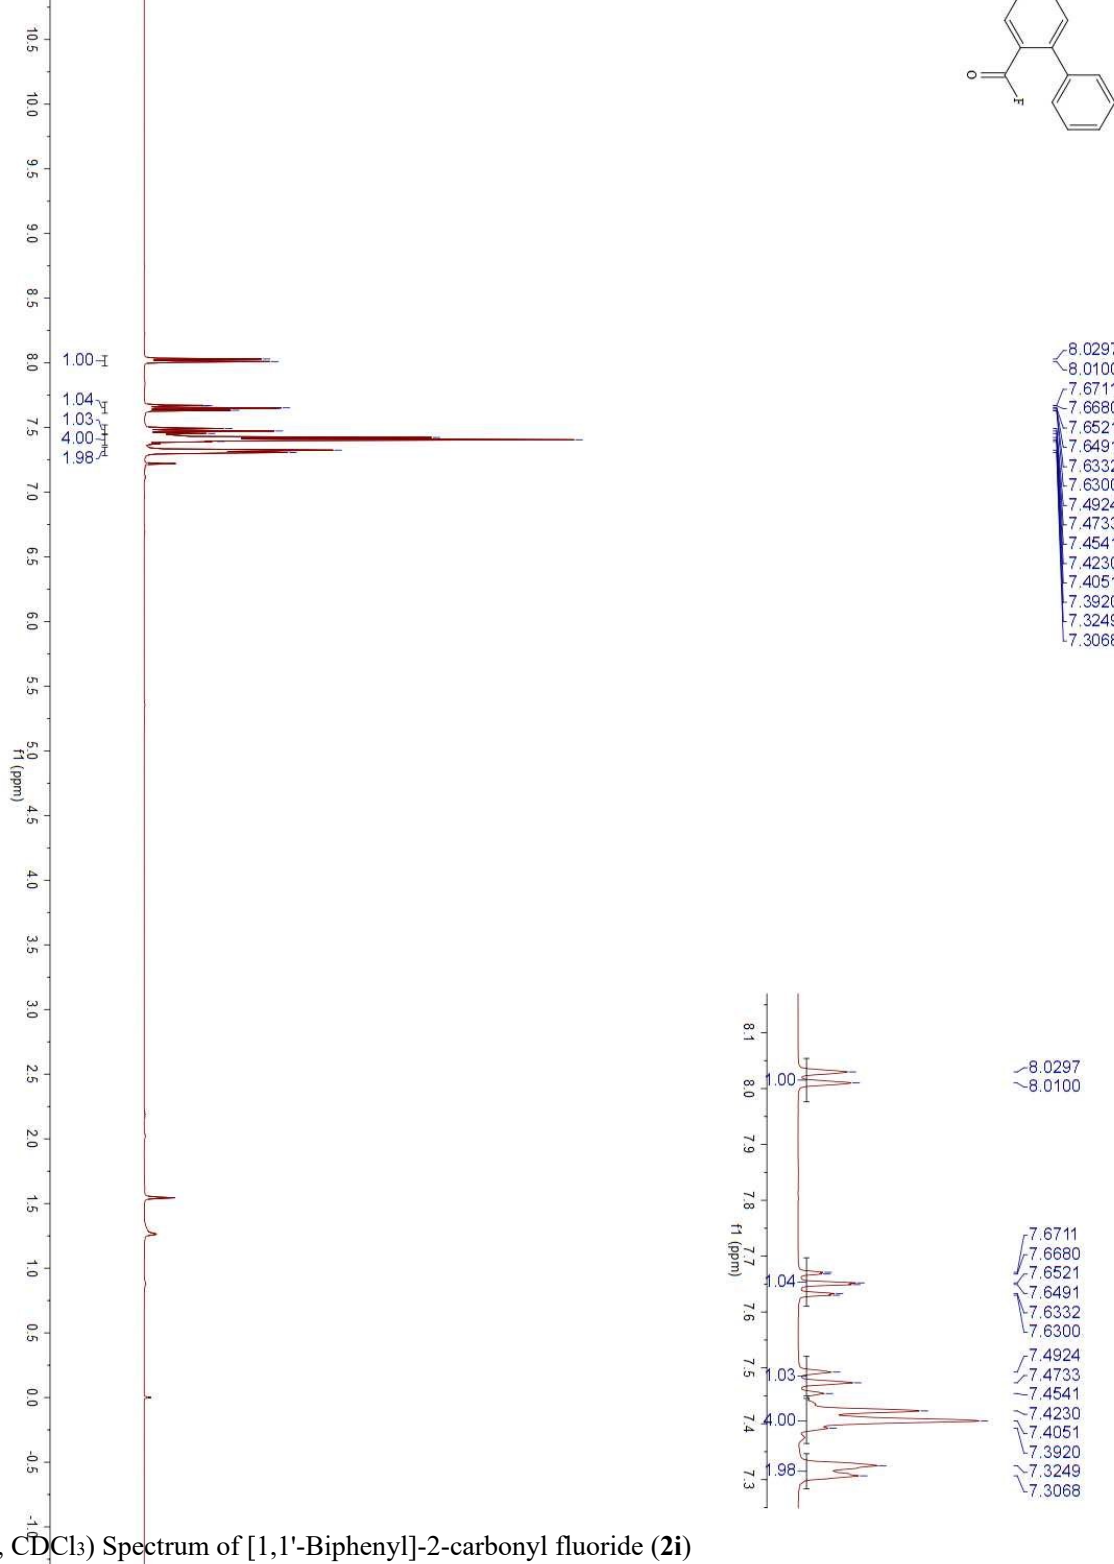

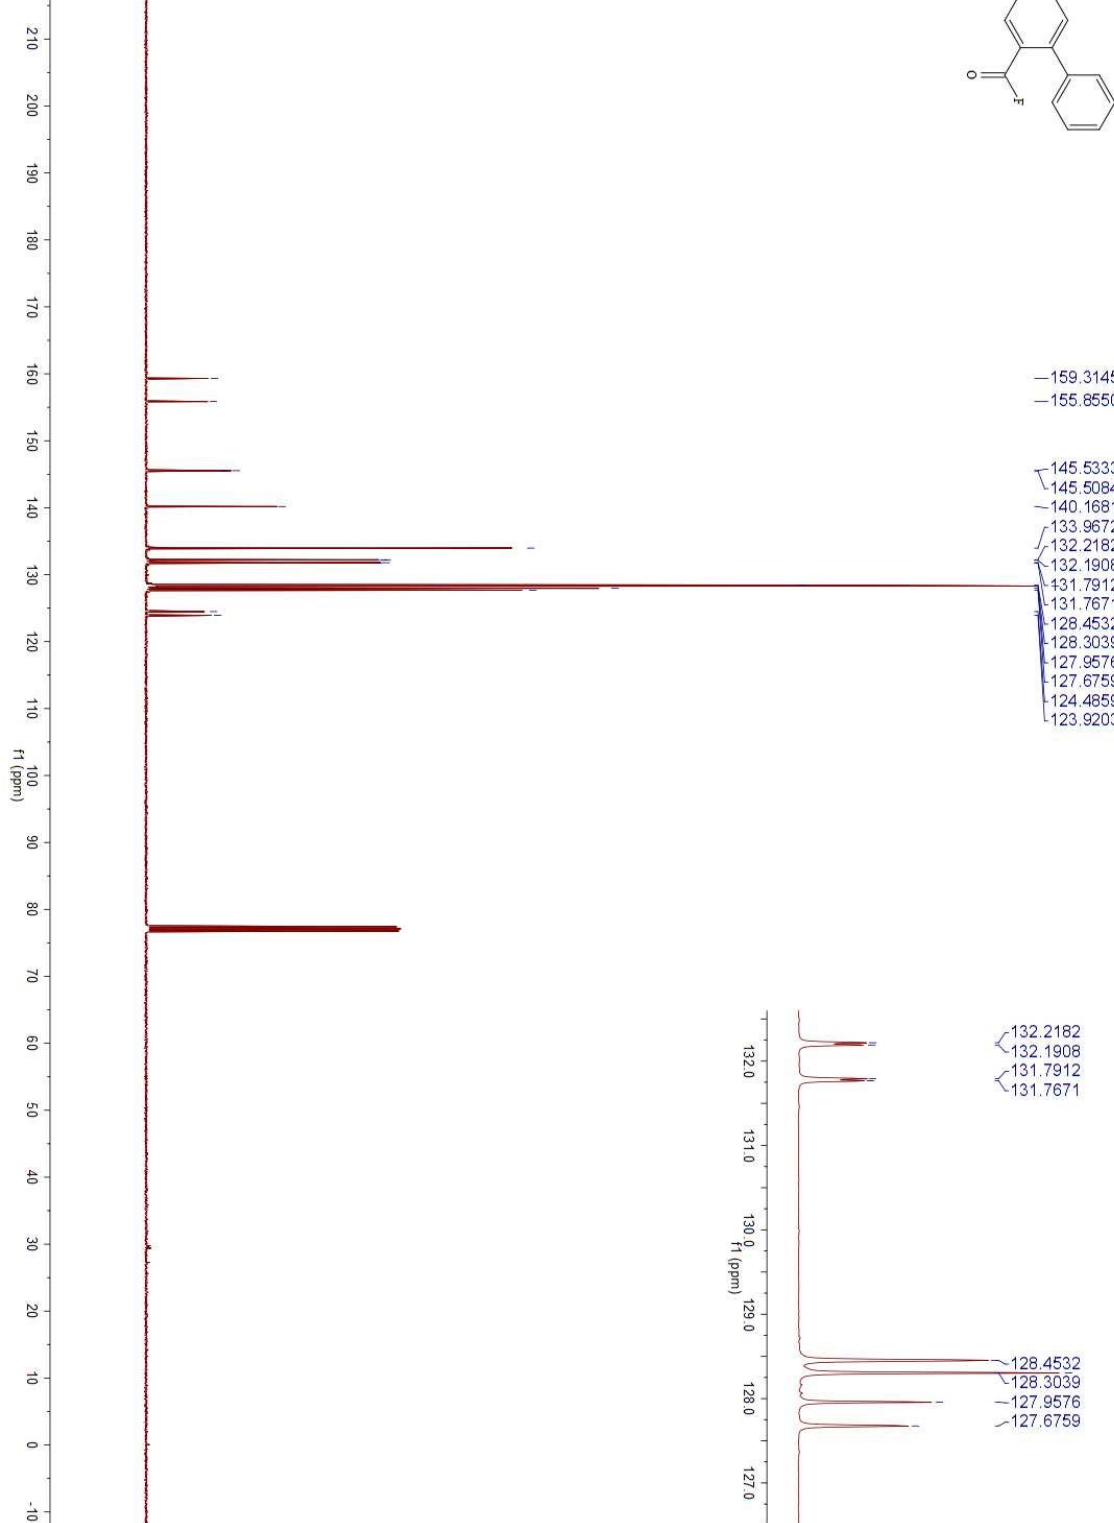

<sup>19</sup>F NMR (376 MHz, CDCl<sub>3</sub>) Spectrum of [1,1'-Biphenyl]-2-carbonyl fluoride (**2i**)

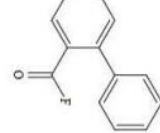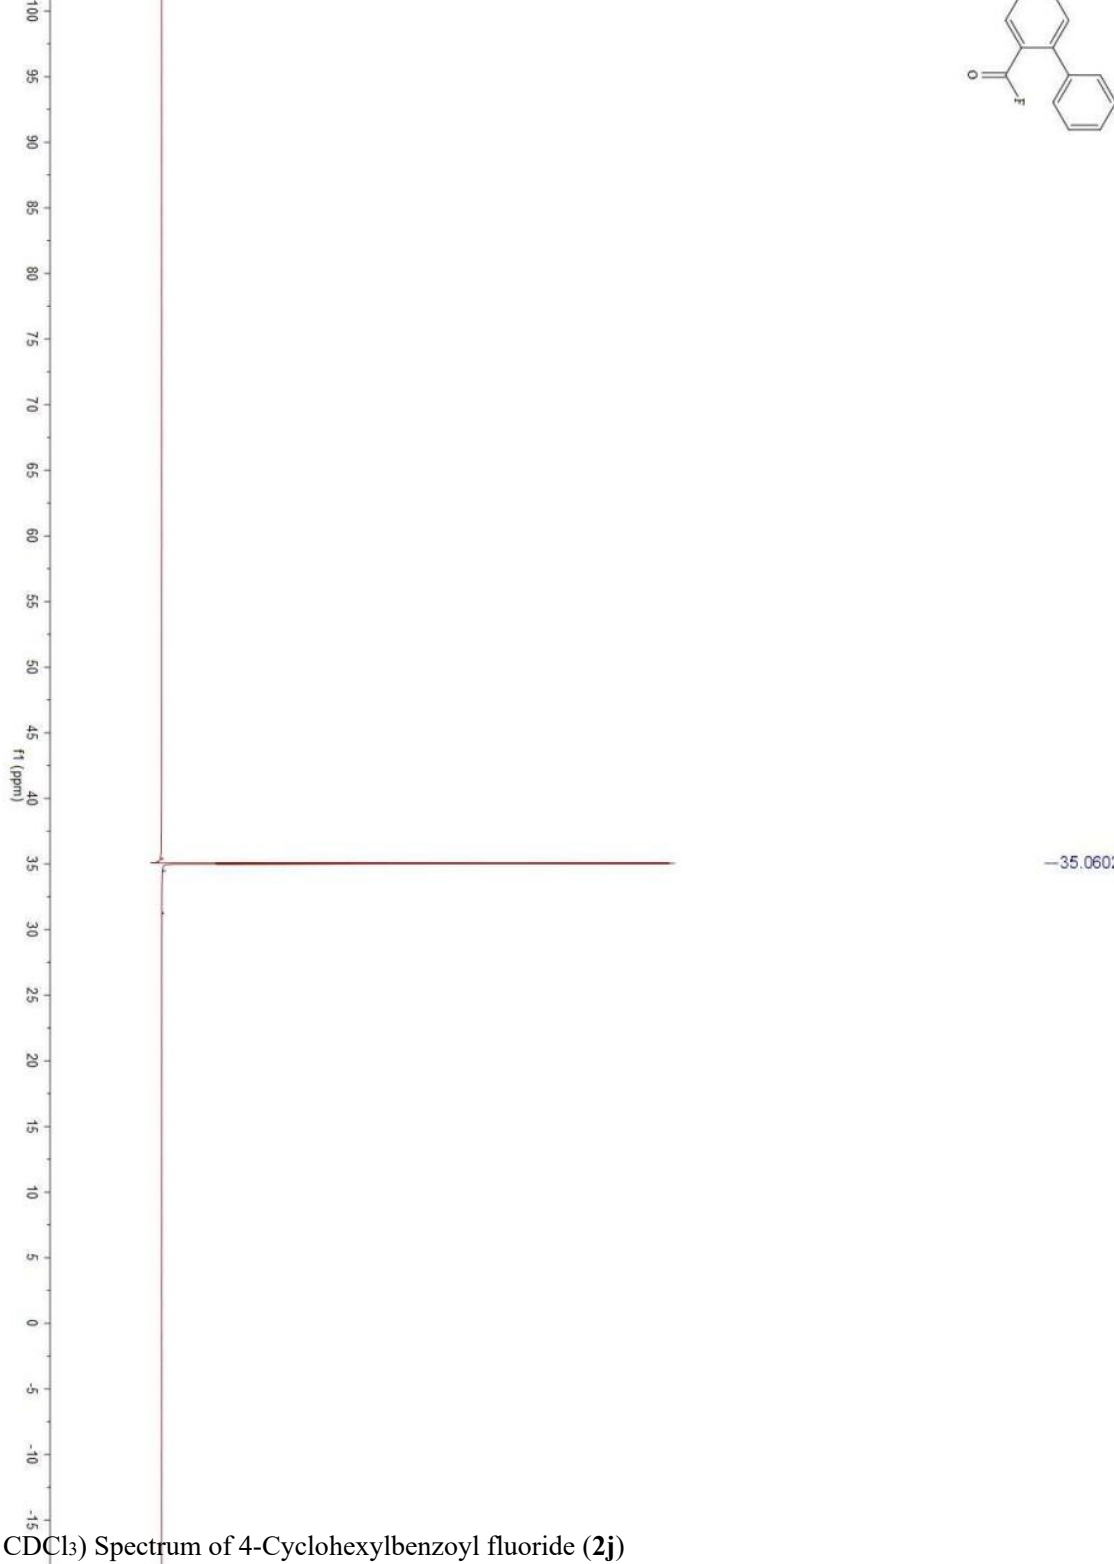

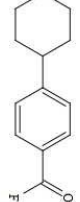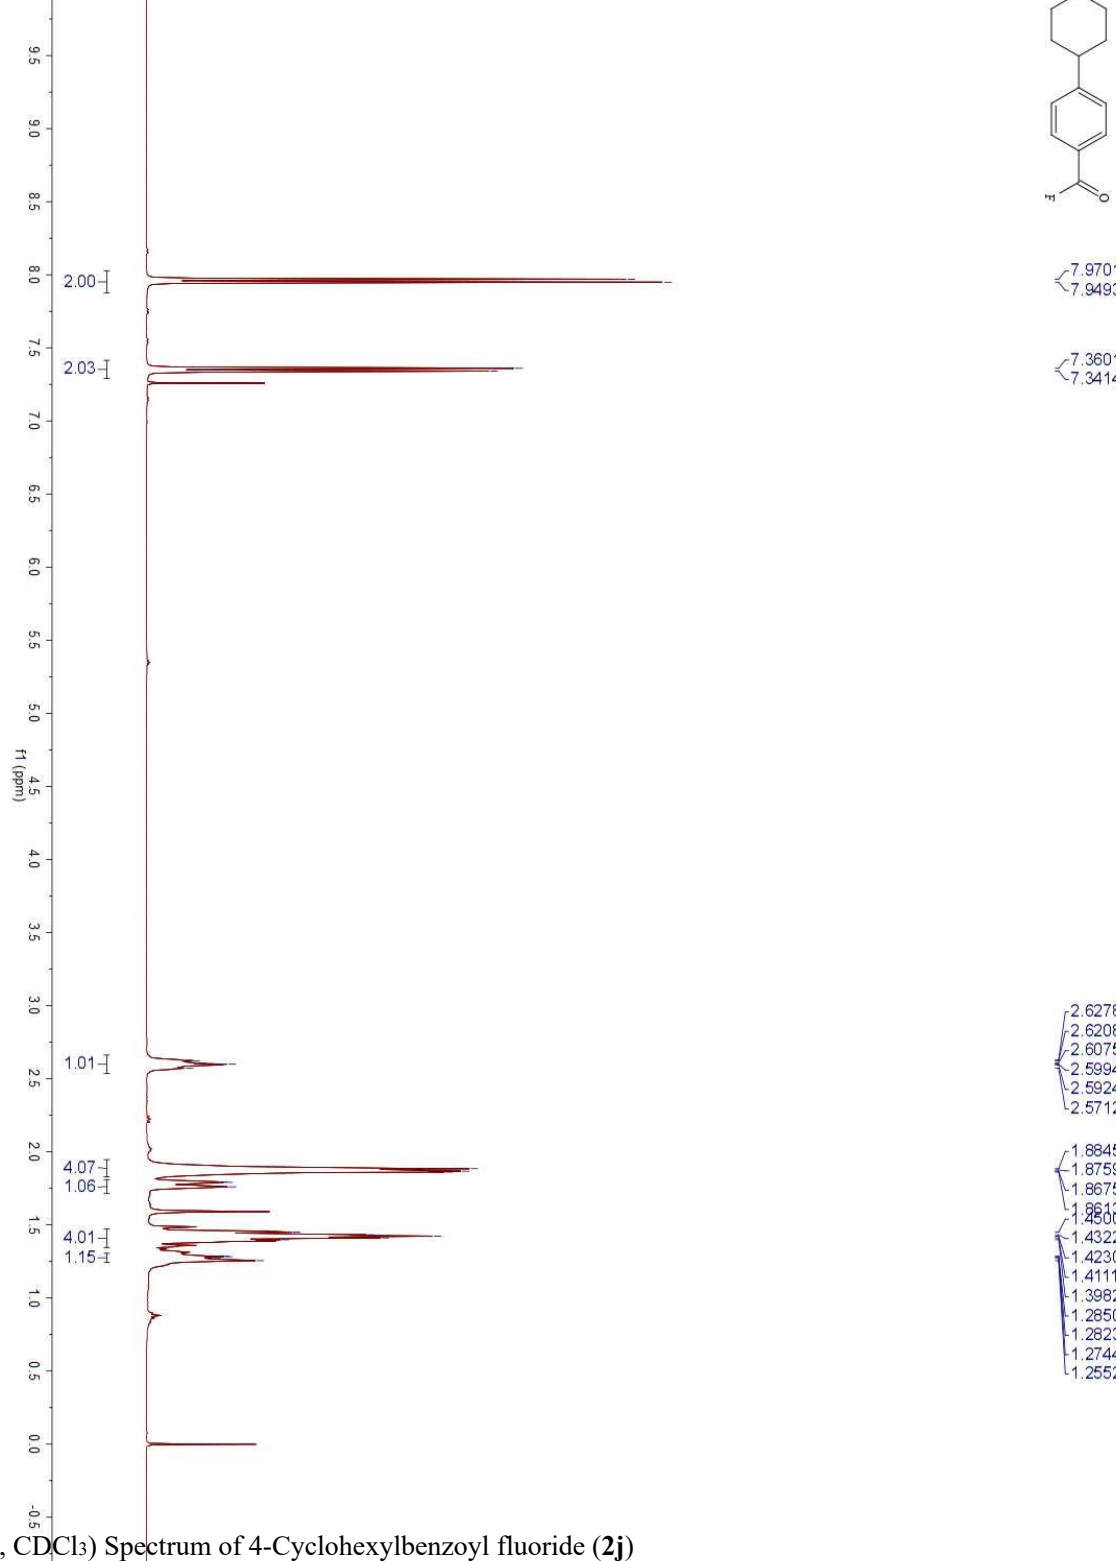

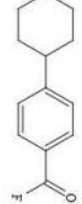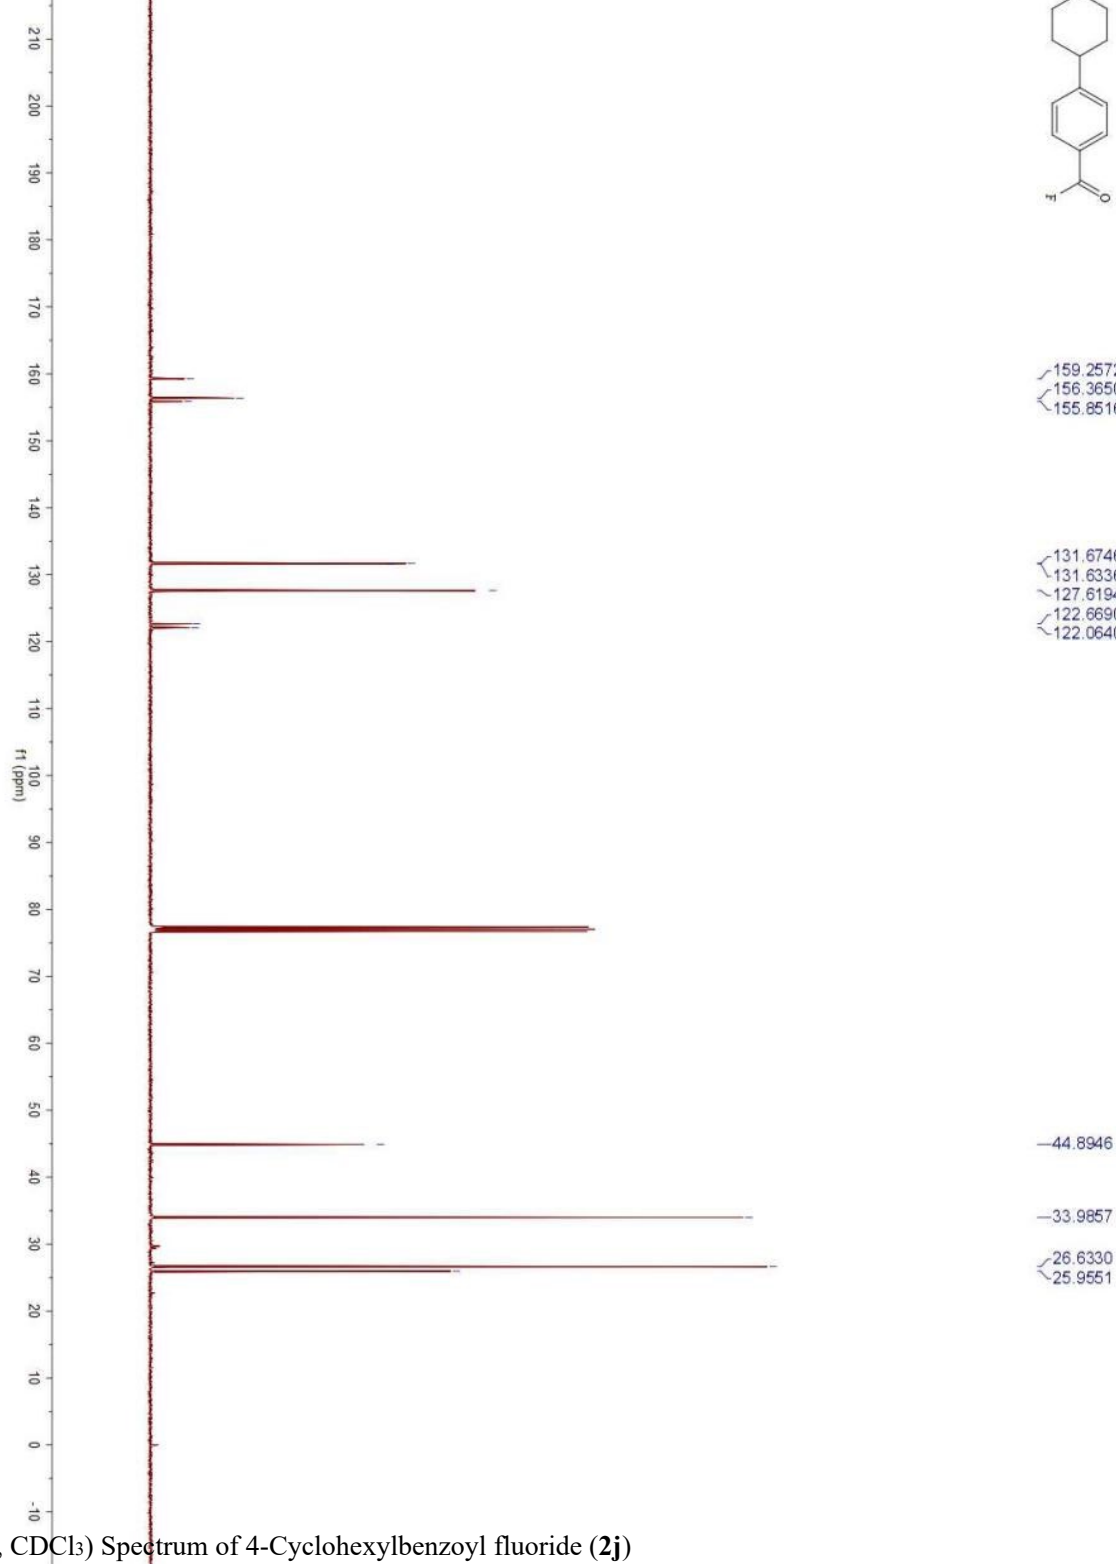



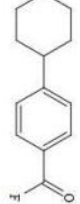

—17.471

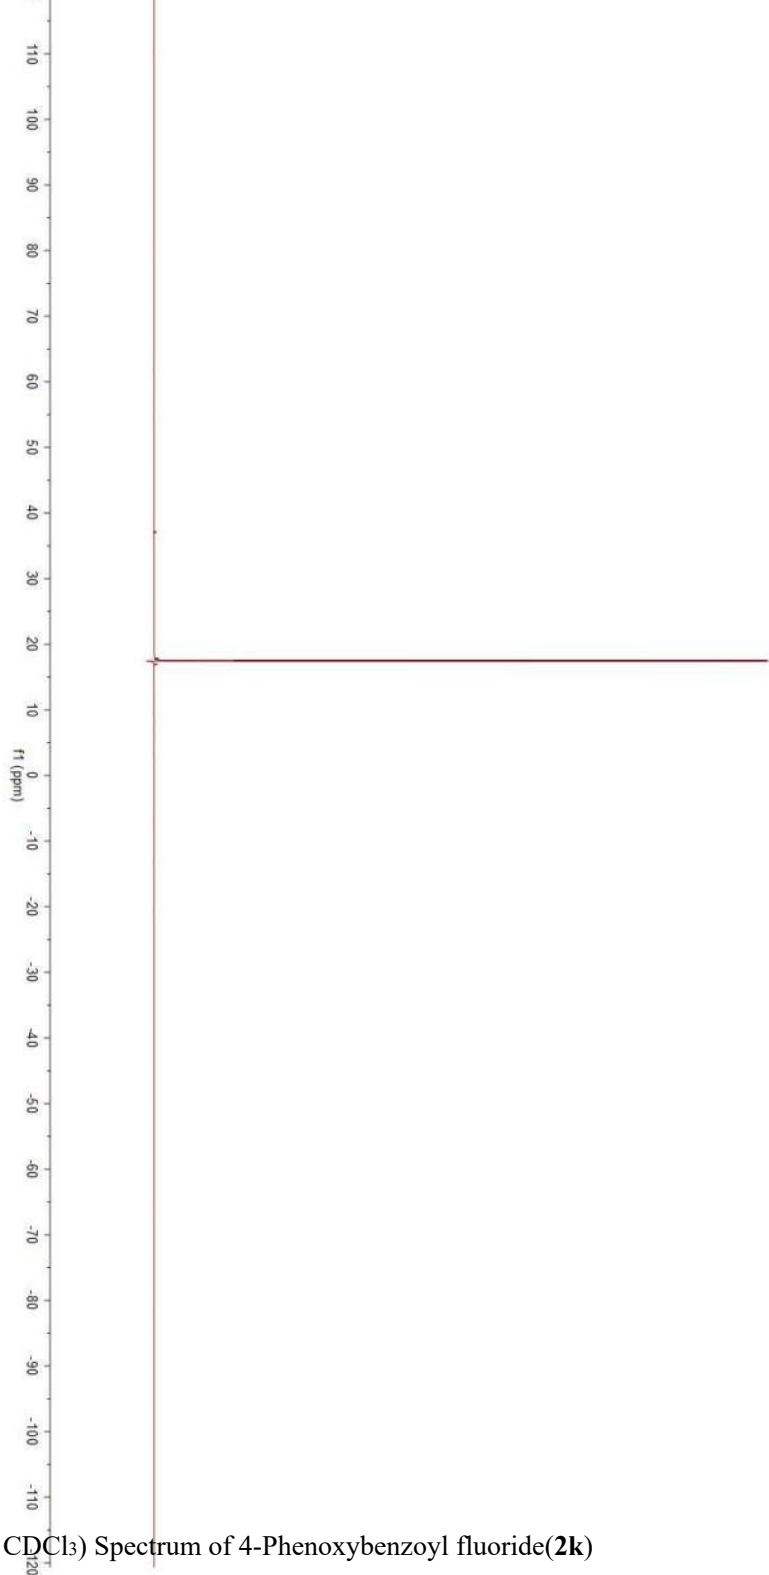

$^1\text{H}$  NMR (400 MHz,  $\text{CDCl}_3$ ) Spectrum of 4-Phenoxybenzoyl fluoride(**2k**)

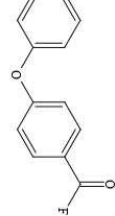

7.9151  
7.9105  
7.8975  
7.8930  
7.3622  
7.3569  
7.3433  
7.3412  
7.3270  
7.3223  
7.1834  
7.1808  
7.1782  
7.1678  
7.1659  
7.1622  
7.1436  
7.0184  
7.0155  
7.0104  
6.9992  
6.9966  
6.9943  
6.9504  
6.9475  
6.9280  
6.9254

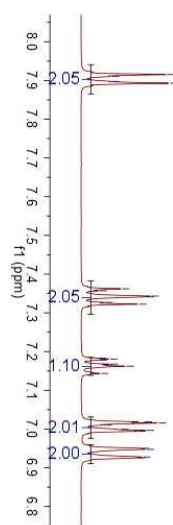

7.9151  
7.9105  
7.8975  
7.8930  
7.3622  
7.3569  
7.3433  
7.3412  
7.3270  
7.3223  
7.1808  
7.1782  
7.1678  
7.1659  
7.1622  
7.1436  
7.0184  
7.0155  
7.0104  
6.9992  
6.9966  
6.9943  
6.9504  
6.9475  
6.9280  
6.9254

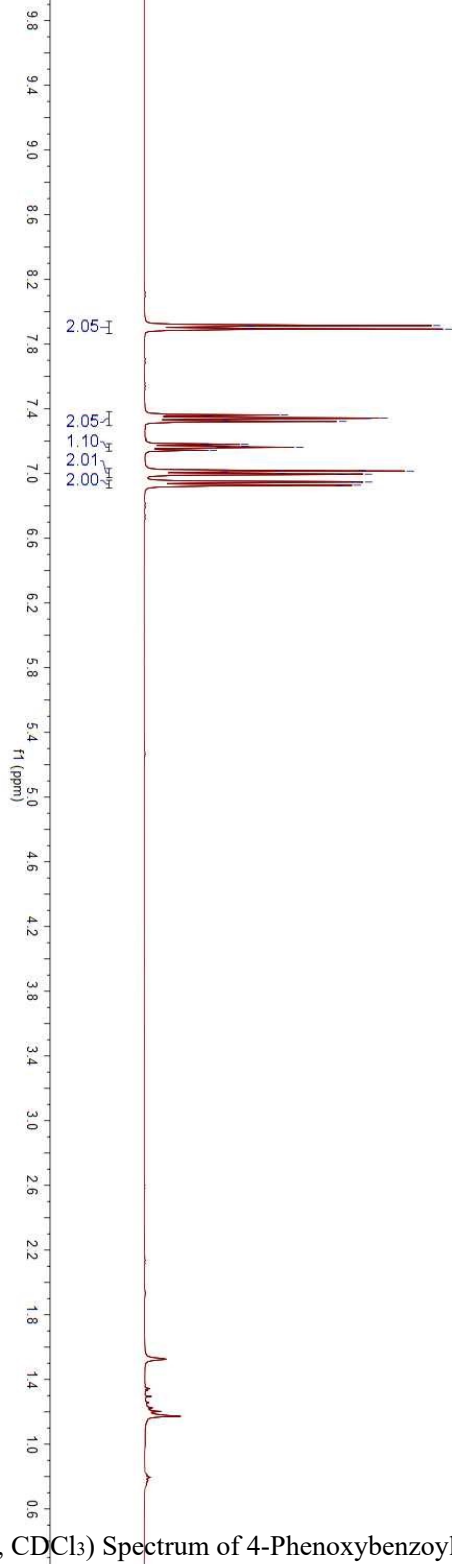

$^{13}\text{C}$  NMR (101 MHz,  $\text{CDCl}_3$ ) Spectrum of 4-Phenoxybenzoyl fluoride(**2k**)

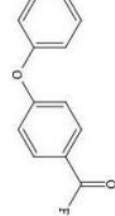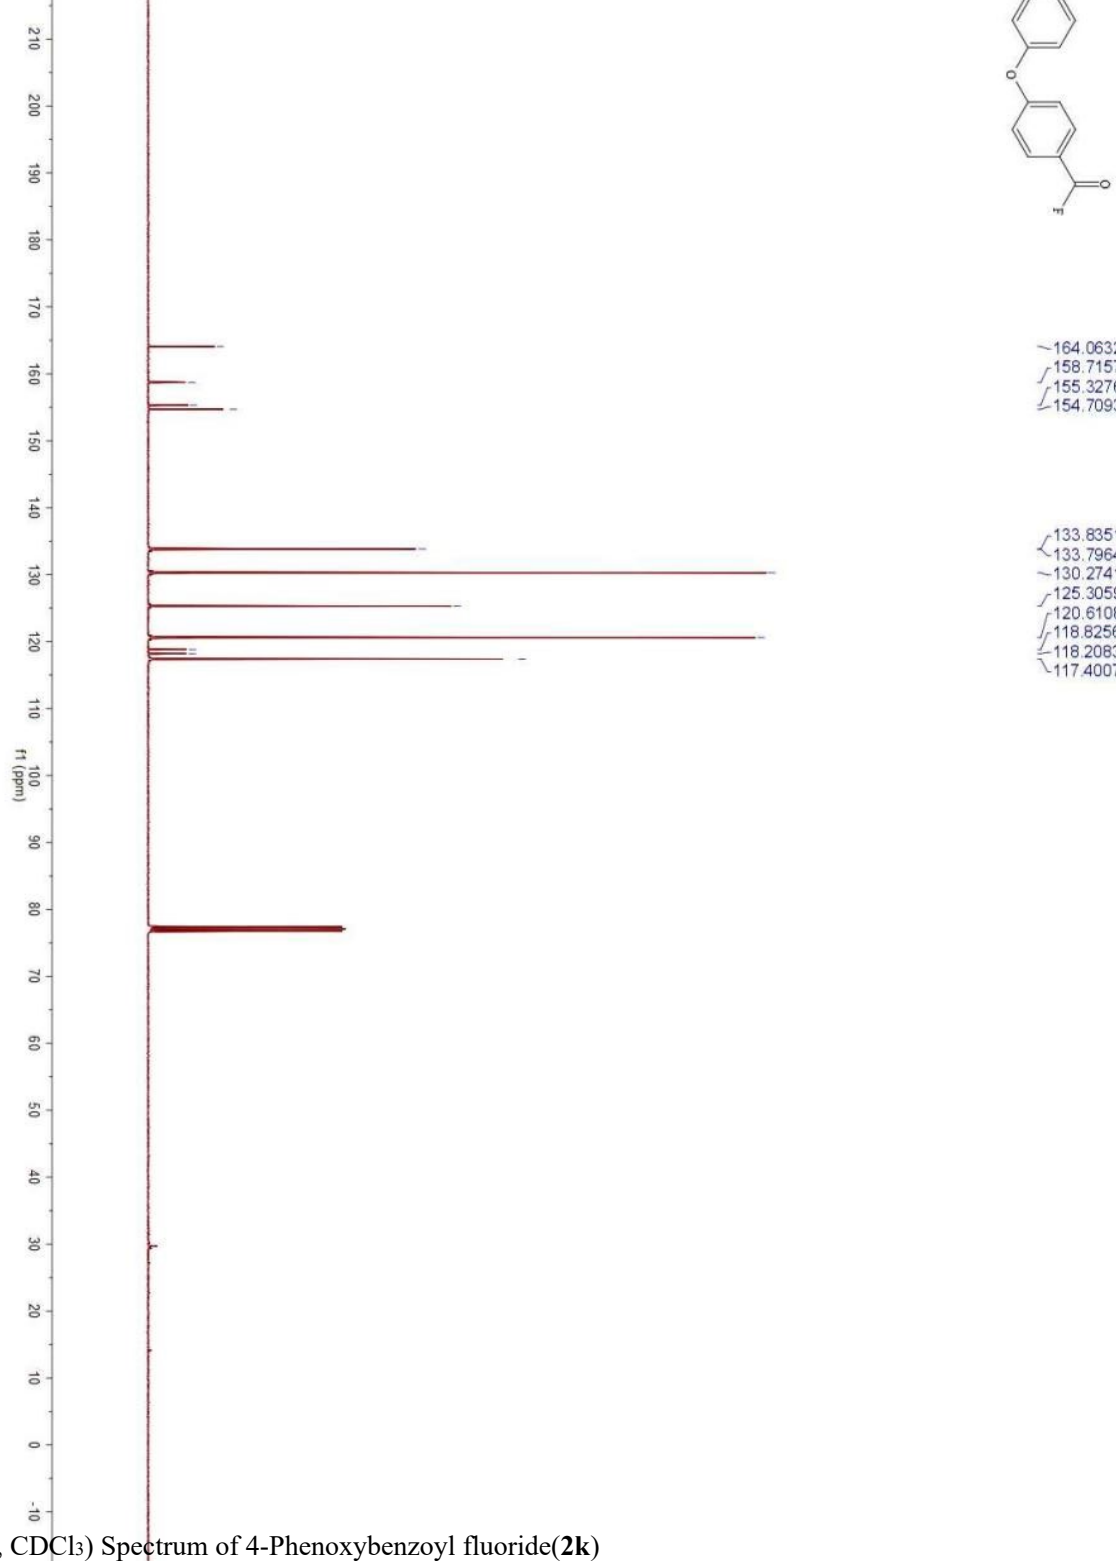

$^{19}\text{F}$  NMR (376 MHz,  $\text{CDCl}_3$ ) Spectrum of 4-Phenoxybenzoyl fluoride(**2k**)

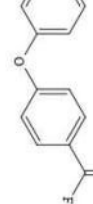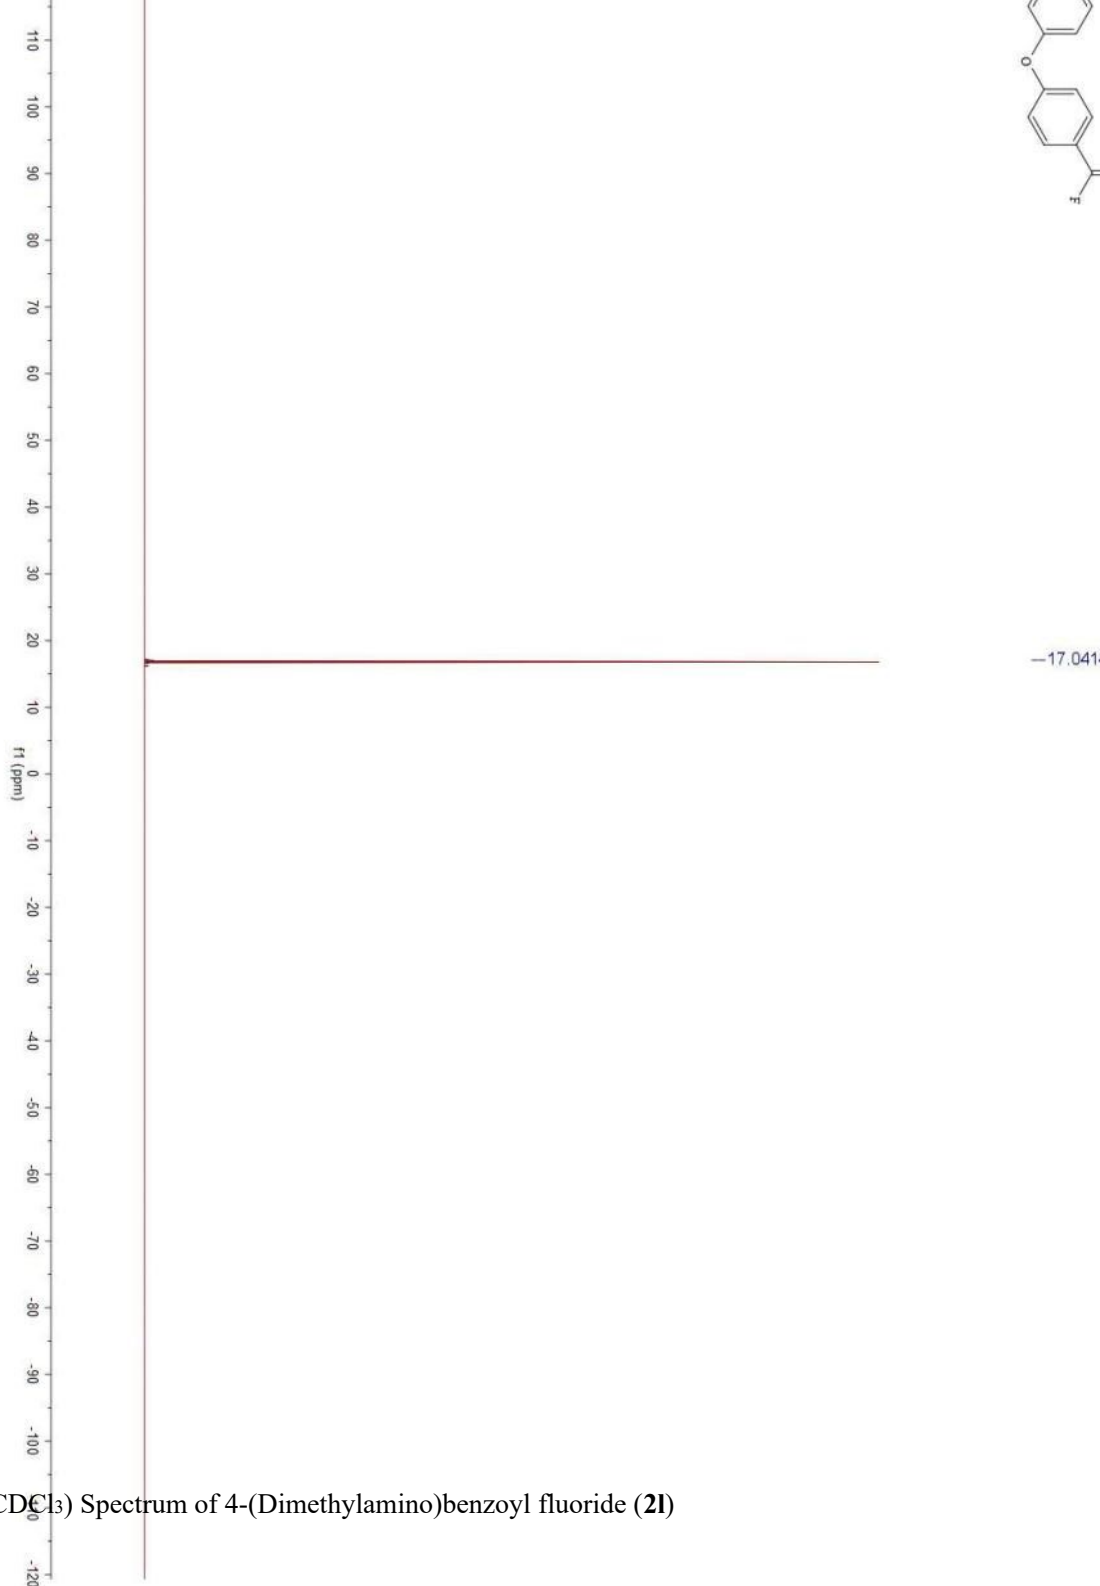

$^1\text{H}$  NMR (400 MHz,  $\text{CDCl}_3$ ) Spectrum of 4-(Dimethylamino)benzoyl fluoride (**21**)

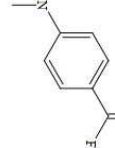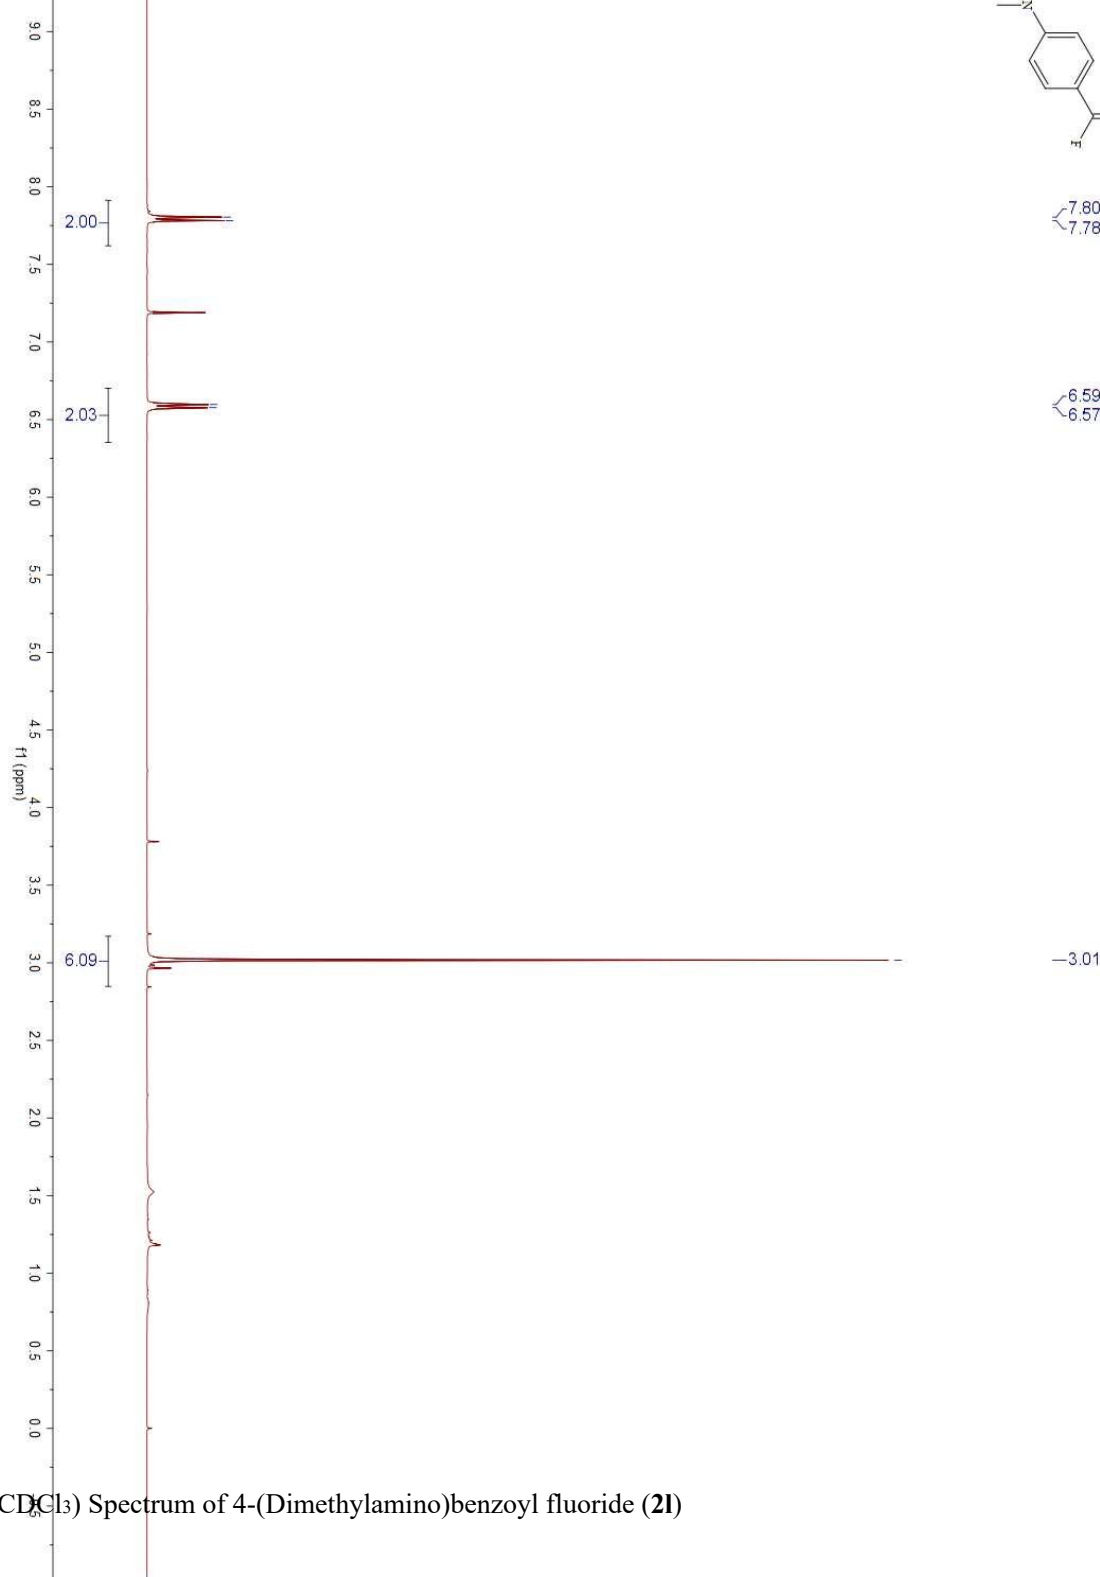

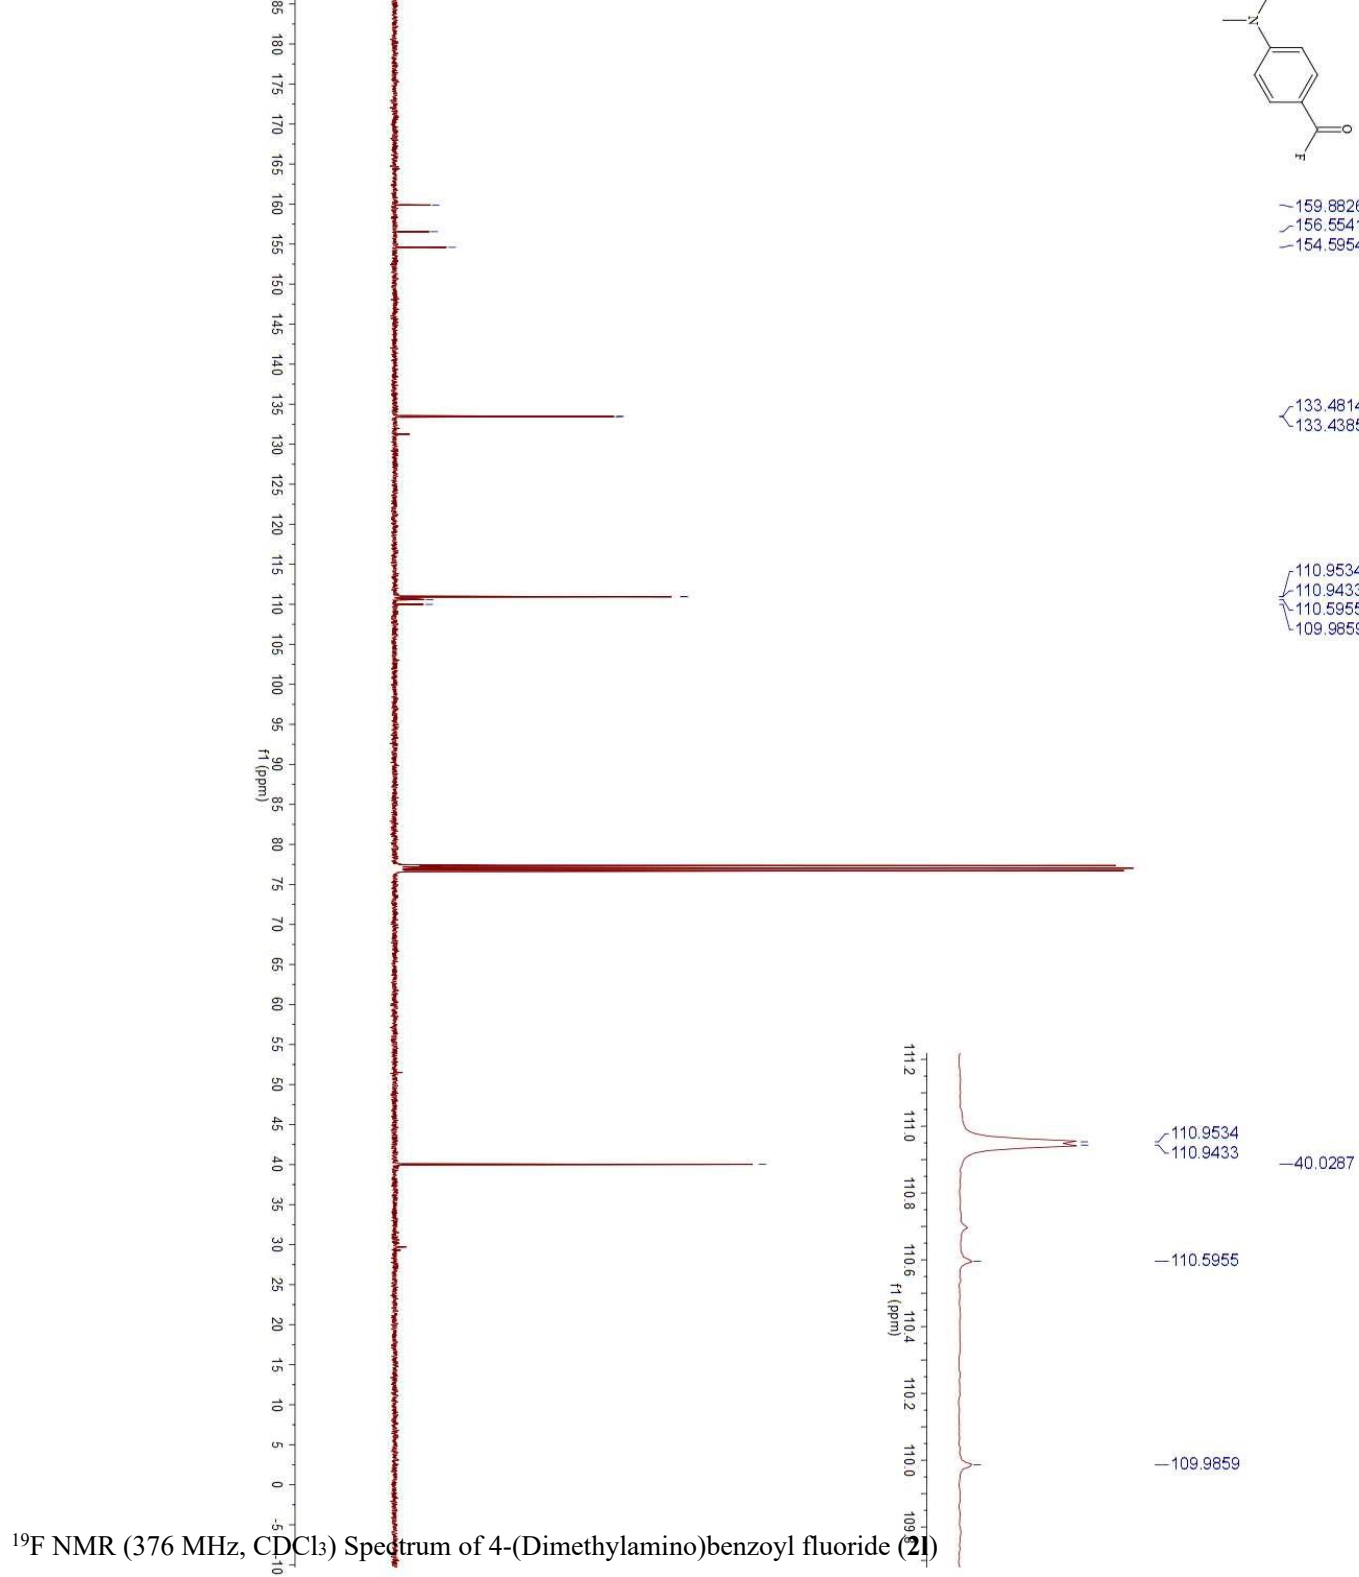

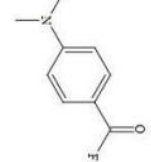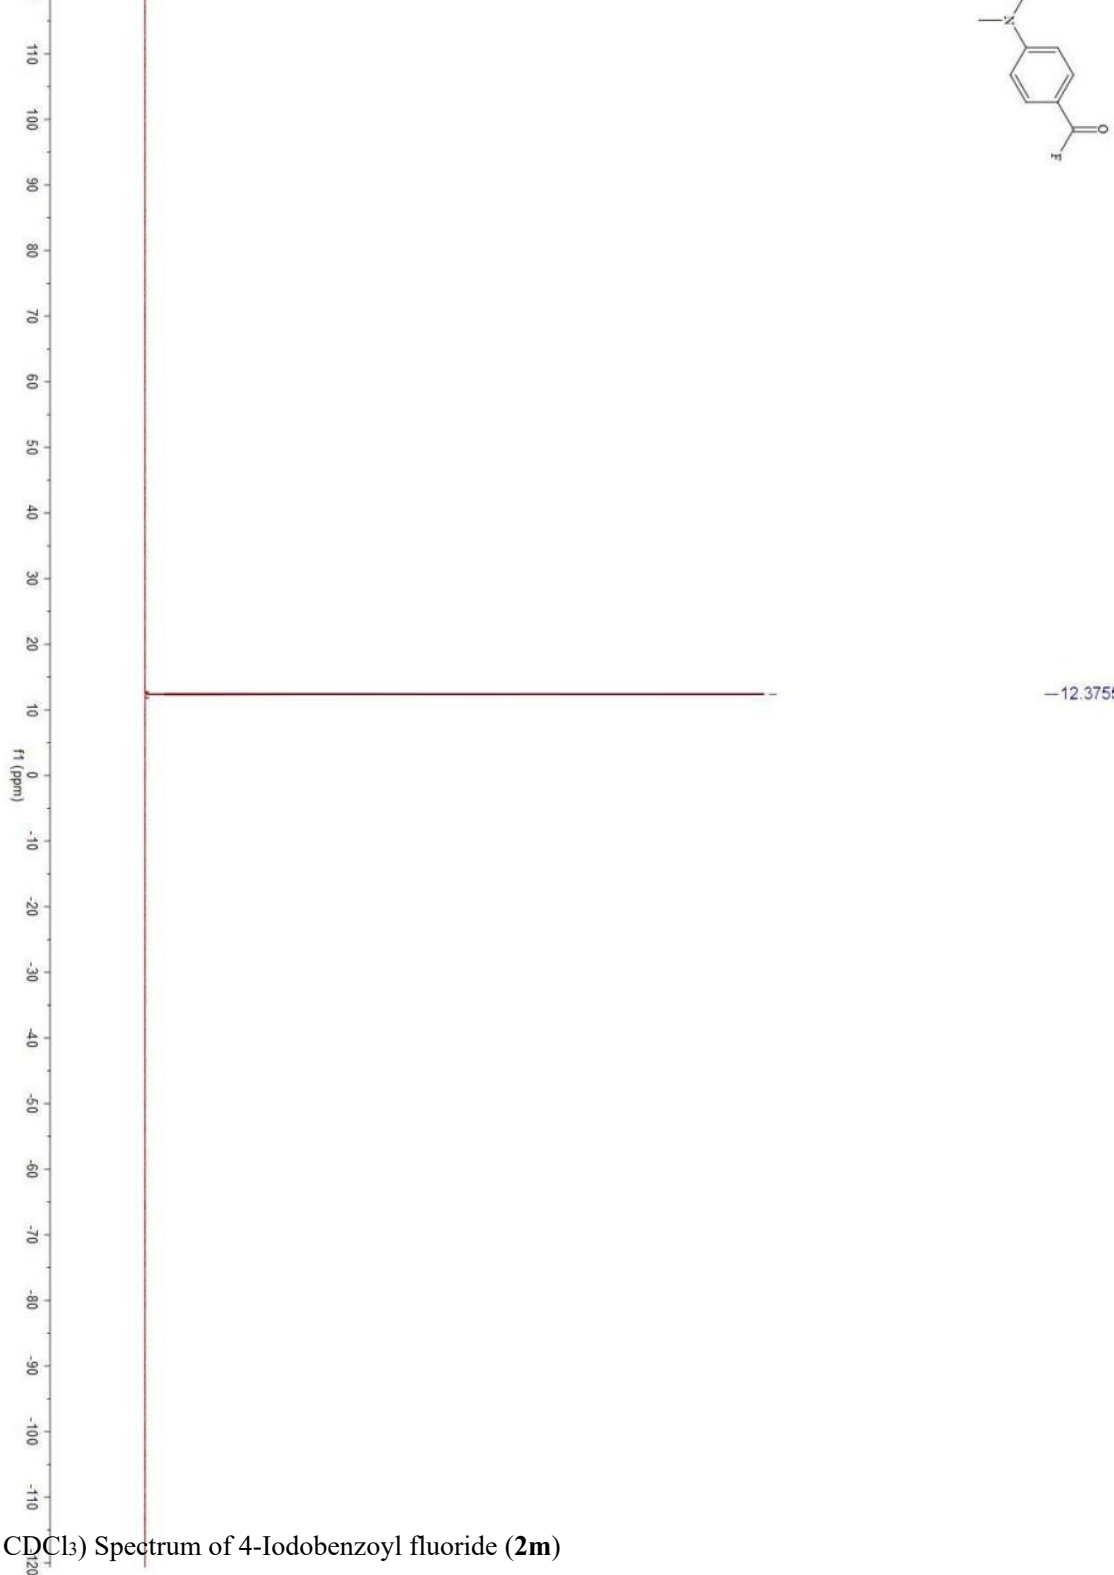

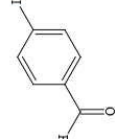

7.8536  
7.8508  
7.8321  
7.8294  
7.6785  
7.6747  
7.6610  
7.6576

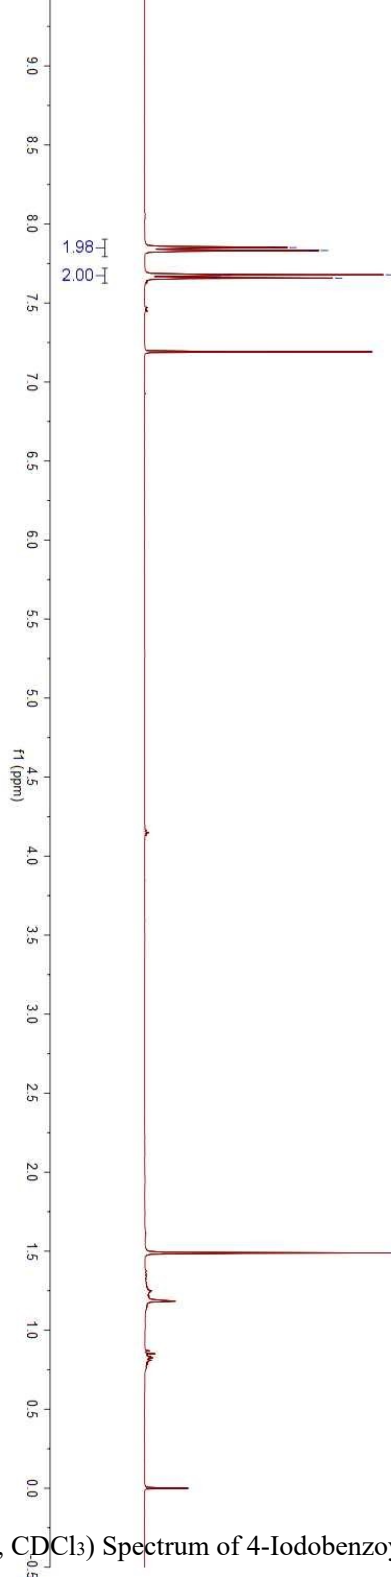

$^{13}\text{C}$  NMR (101 MHz,  $\text{CDCl}_3$ ) Spectrum of 4-Iodobenzoyl fluoride (**2m**)



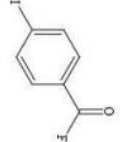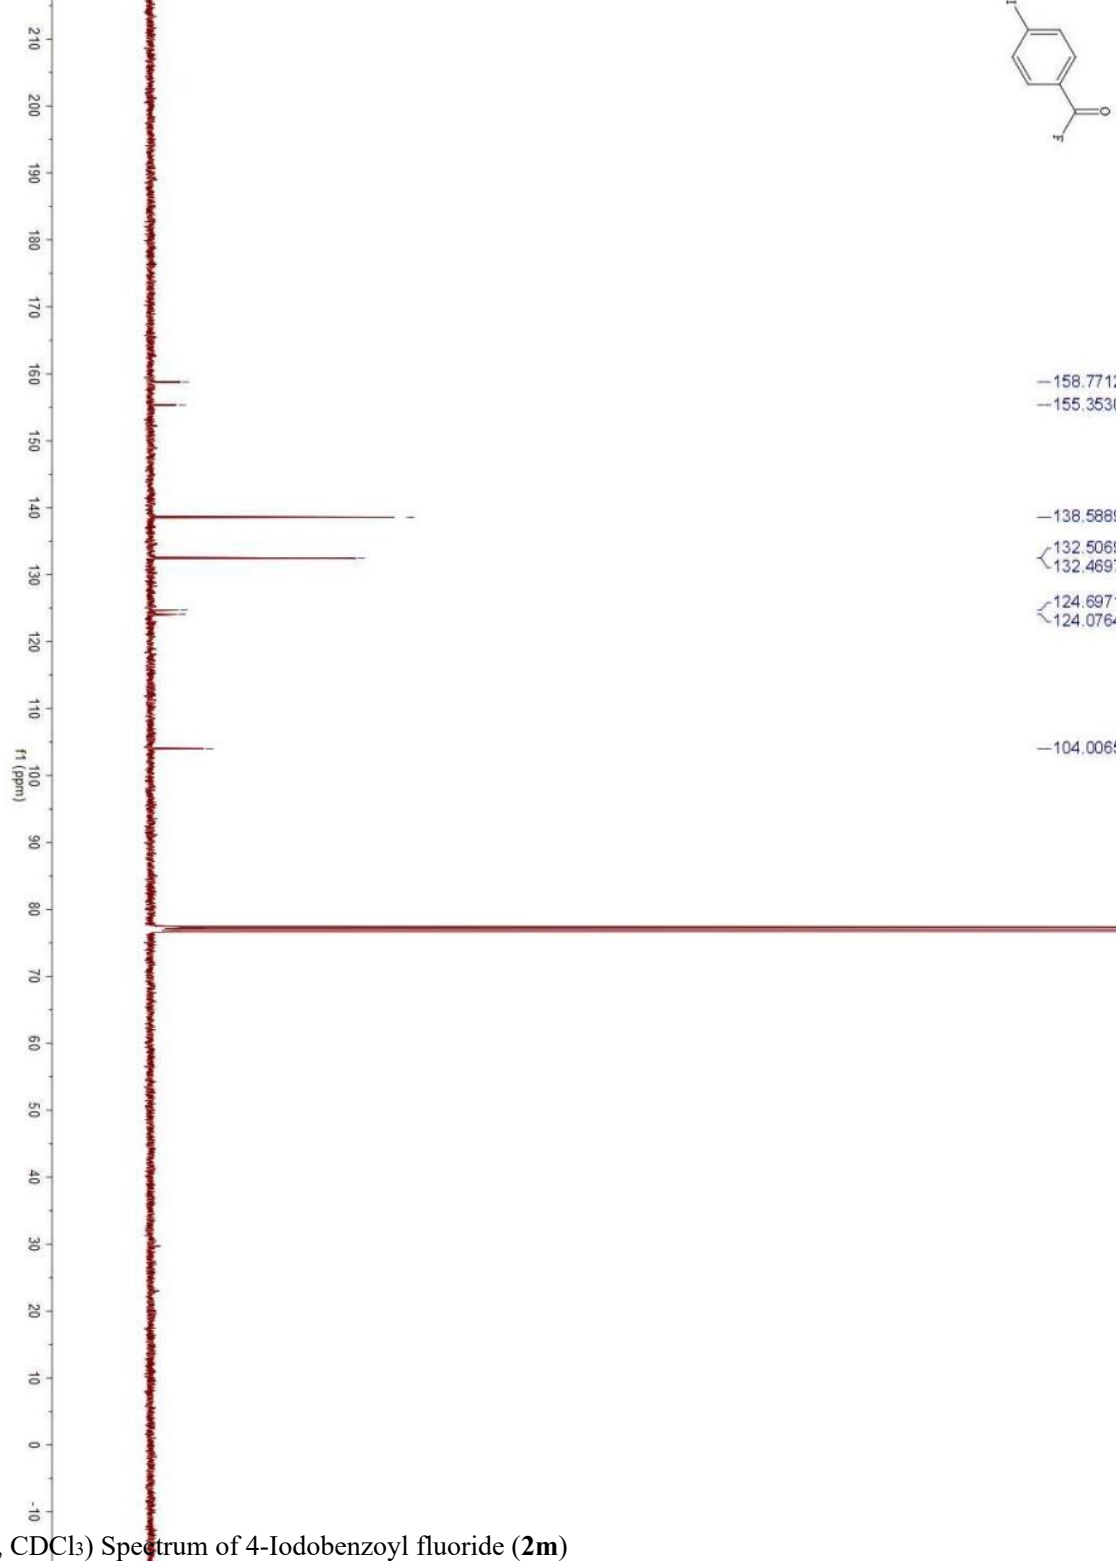

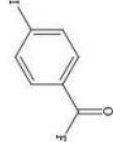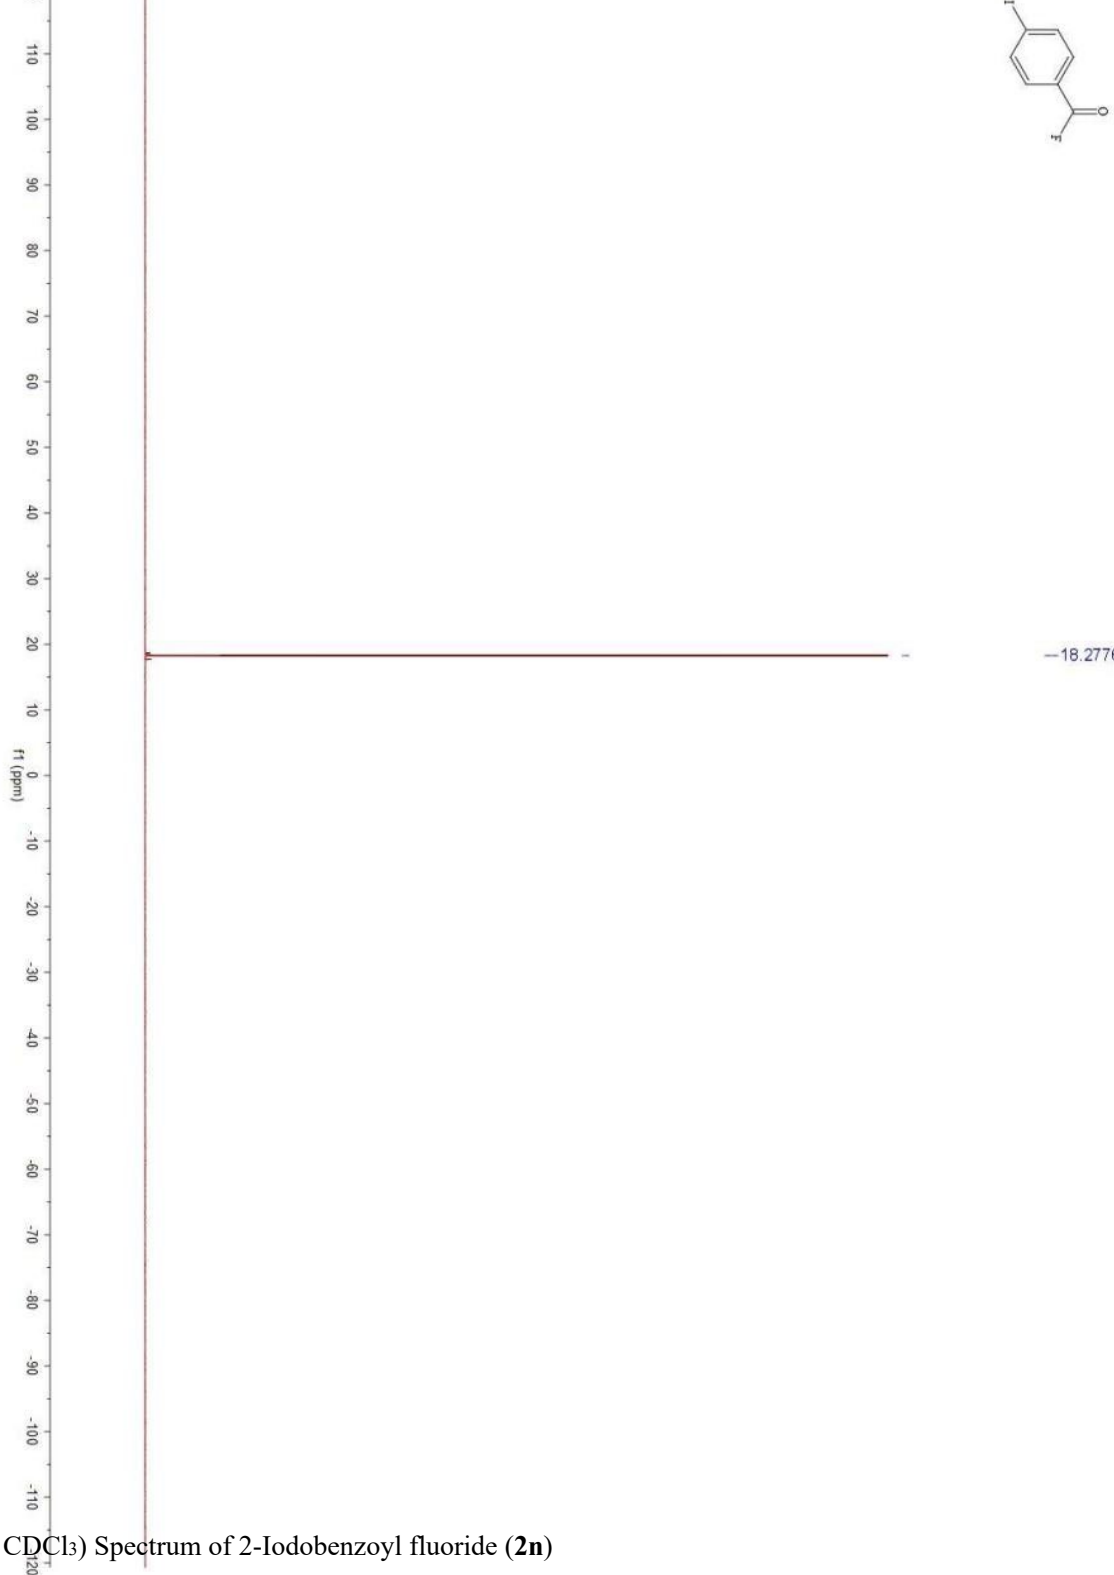

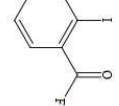

8.0735  
8.0536  
7.9681  
7.9640  
7.9484  
7.9443  
7.4566  
7.4542  
7.4374  
7.4361  
7.4184  
7.4160  
7.2527  
7.2484  
7.2334  
7.2294  
7.2142  
7.2100

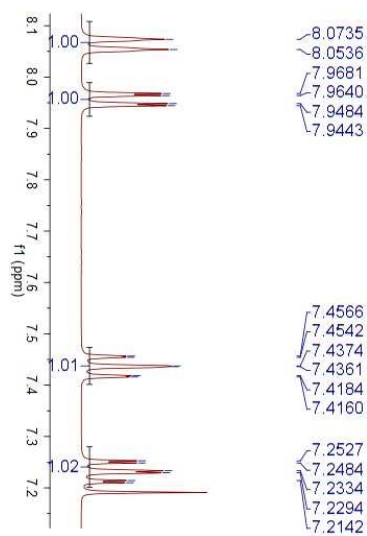

$^{13}\text{C}$  NMR (101 MHz,  $\text{CDCl}_3$ ) Spectrum of 2-Iodobenzoyl fluoride (**2n**)

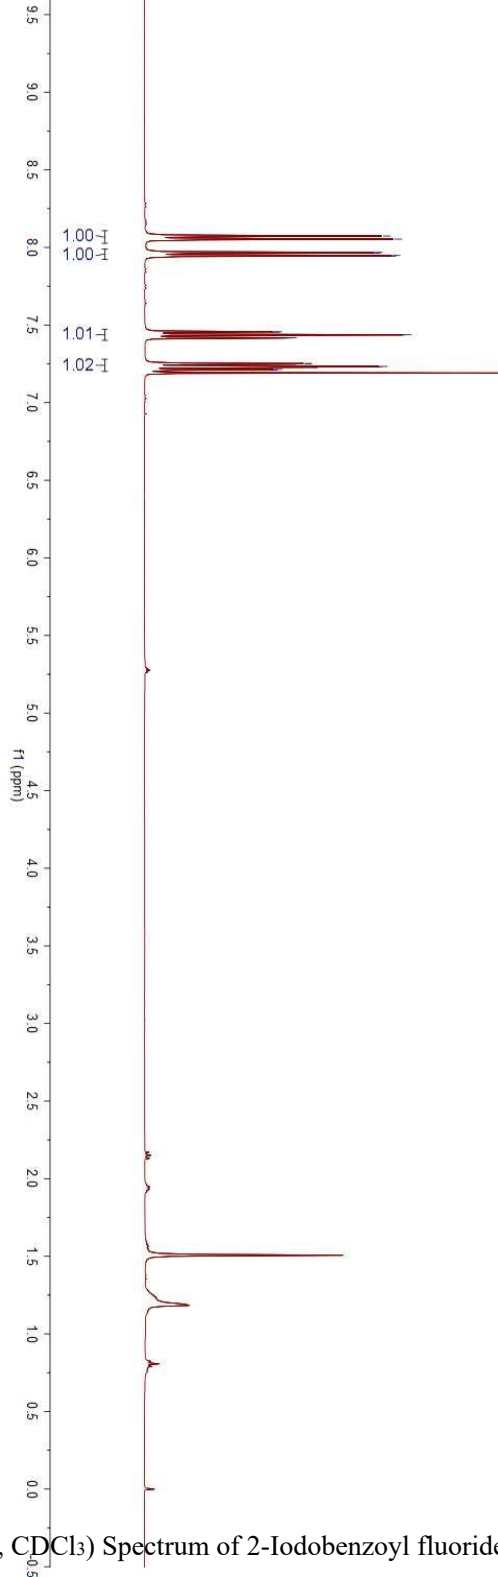

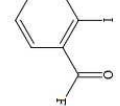

$^{19}\text{F}$  NMR (376 MHz,  $\text{CDCl}_3$ ) Spectrum of 2-Iodobenzoyl fluoride (**2n**)

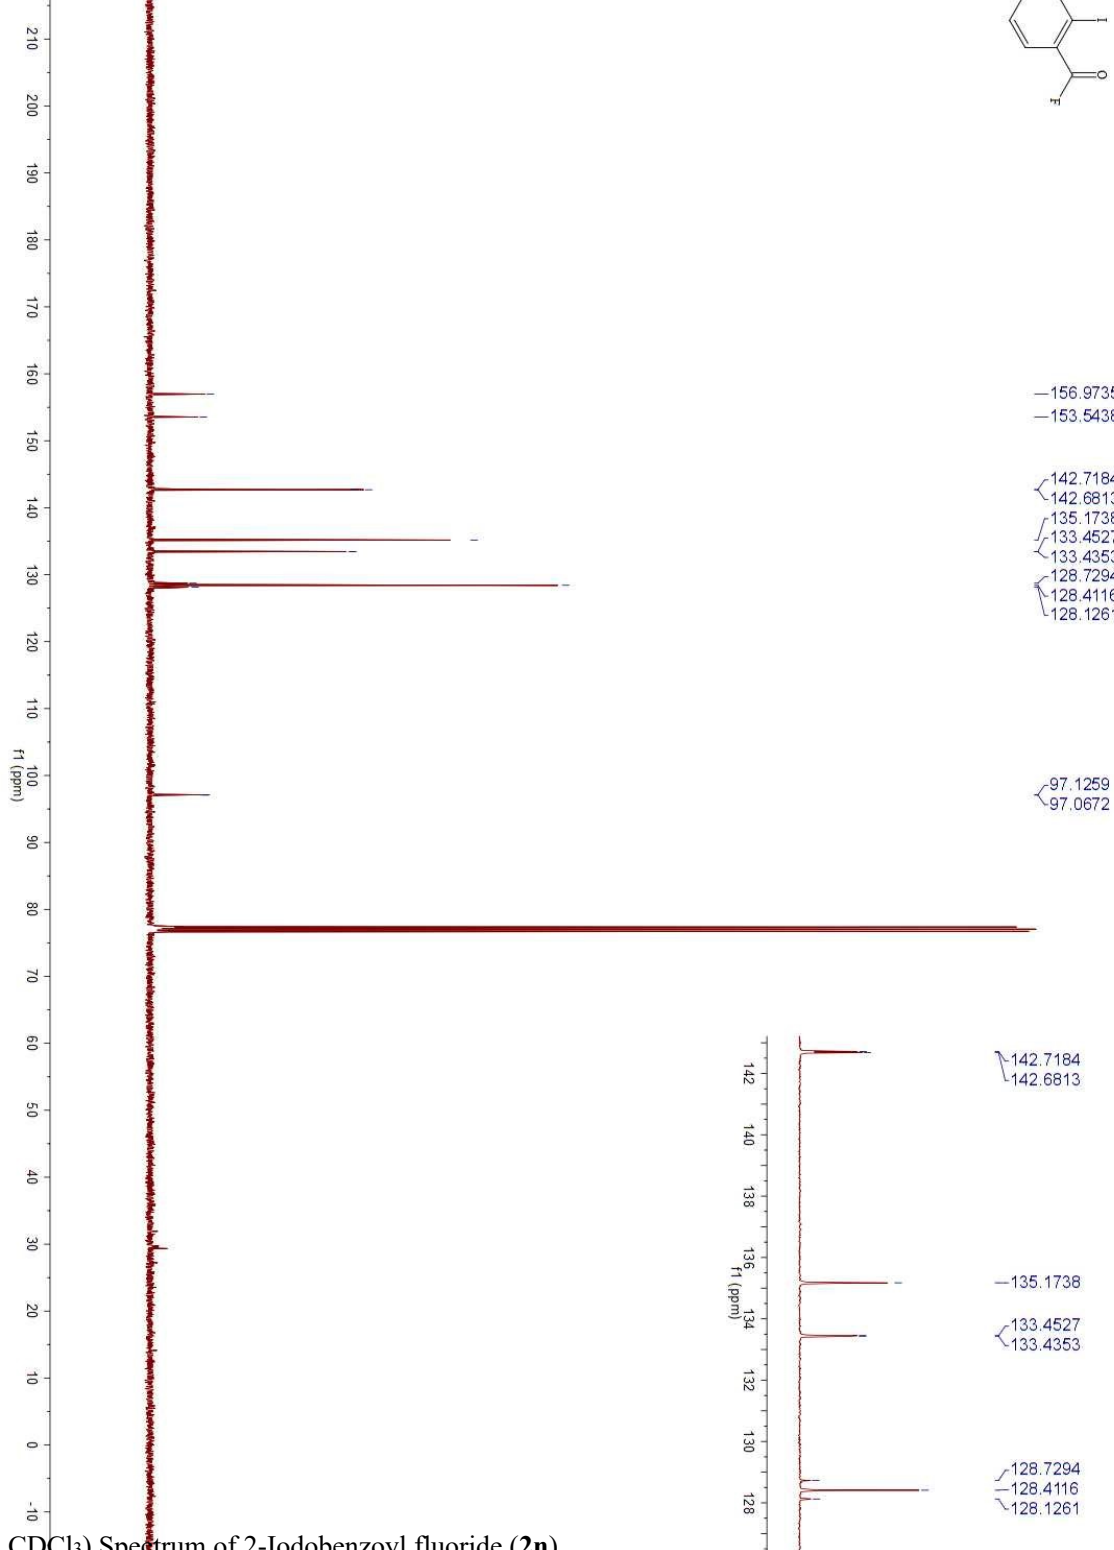

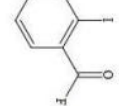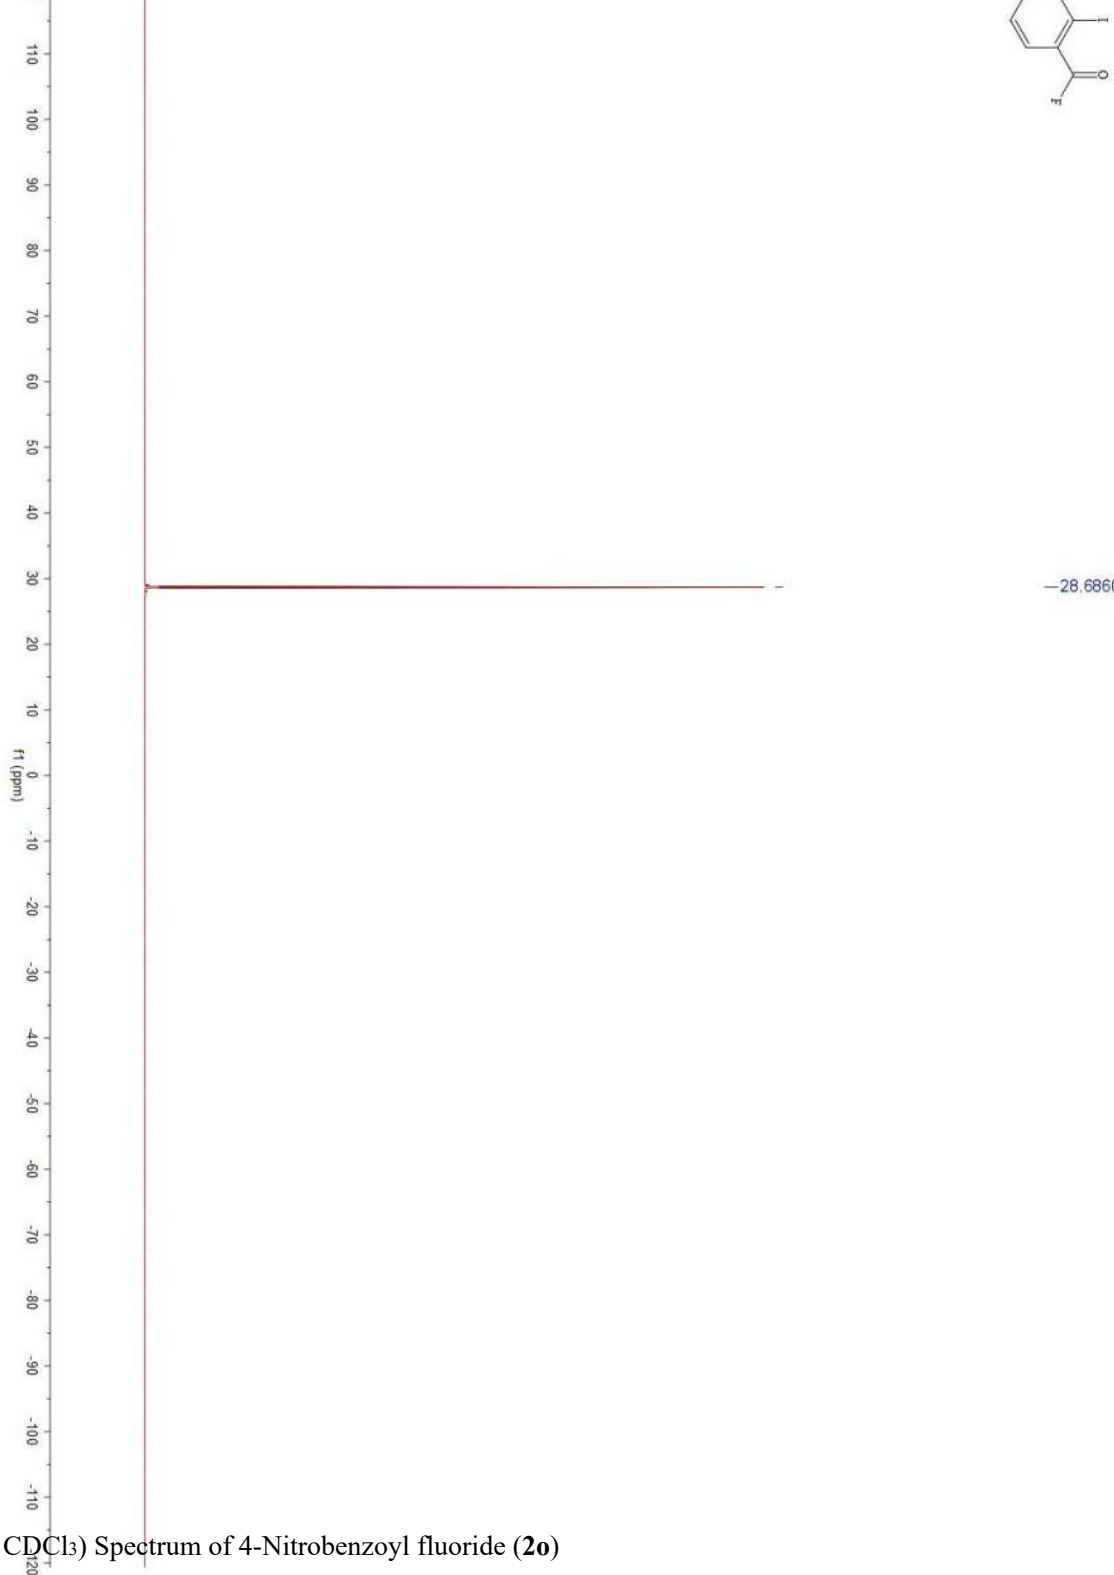

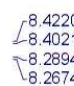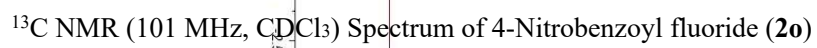

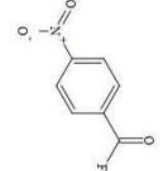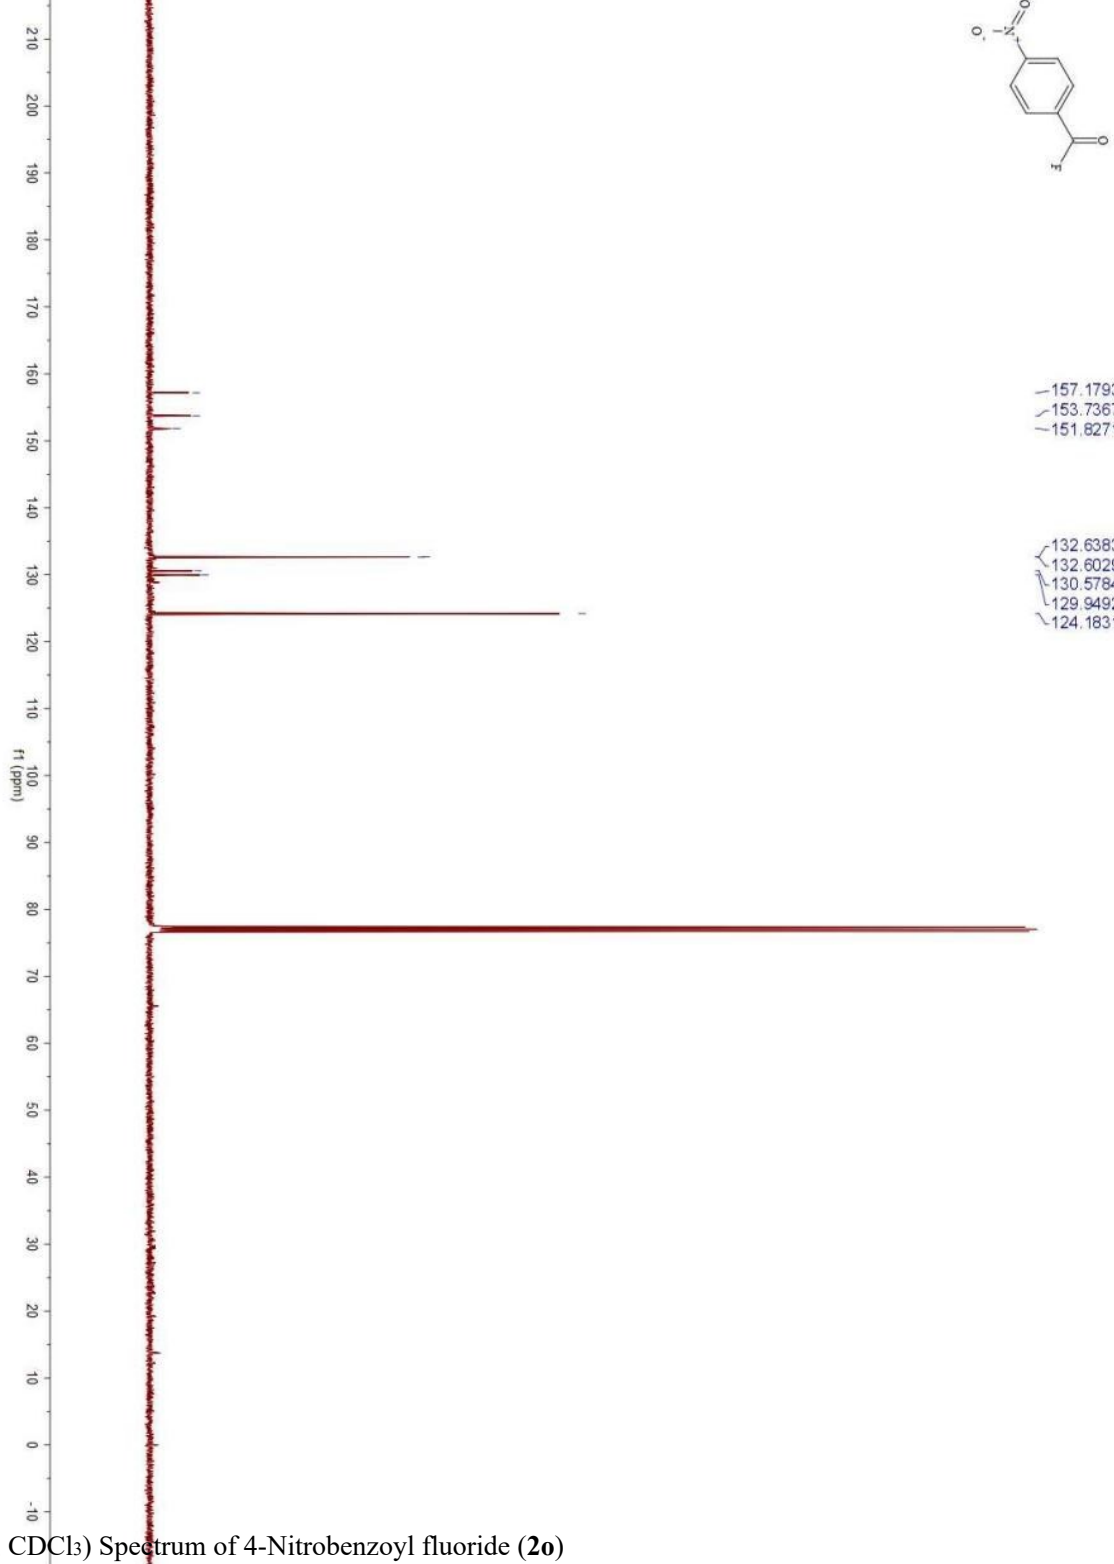

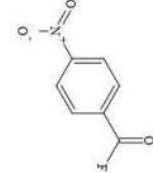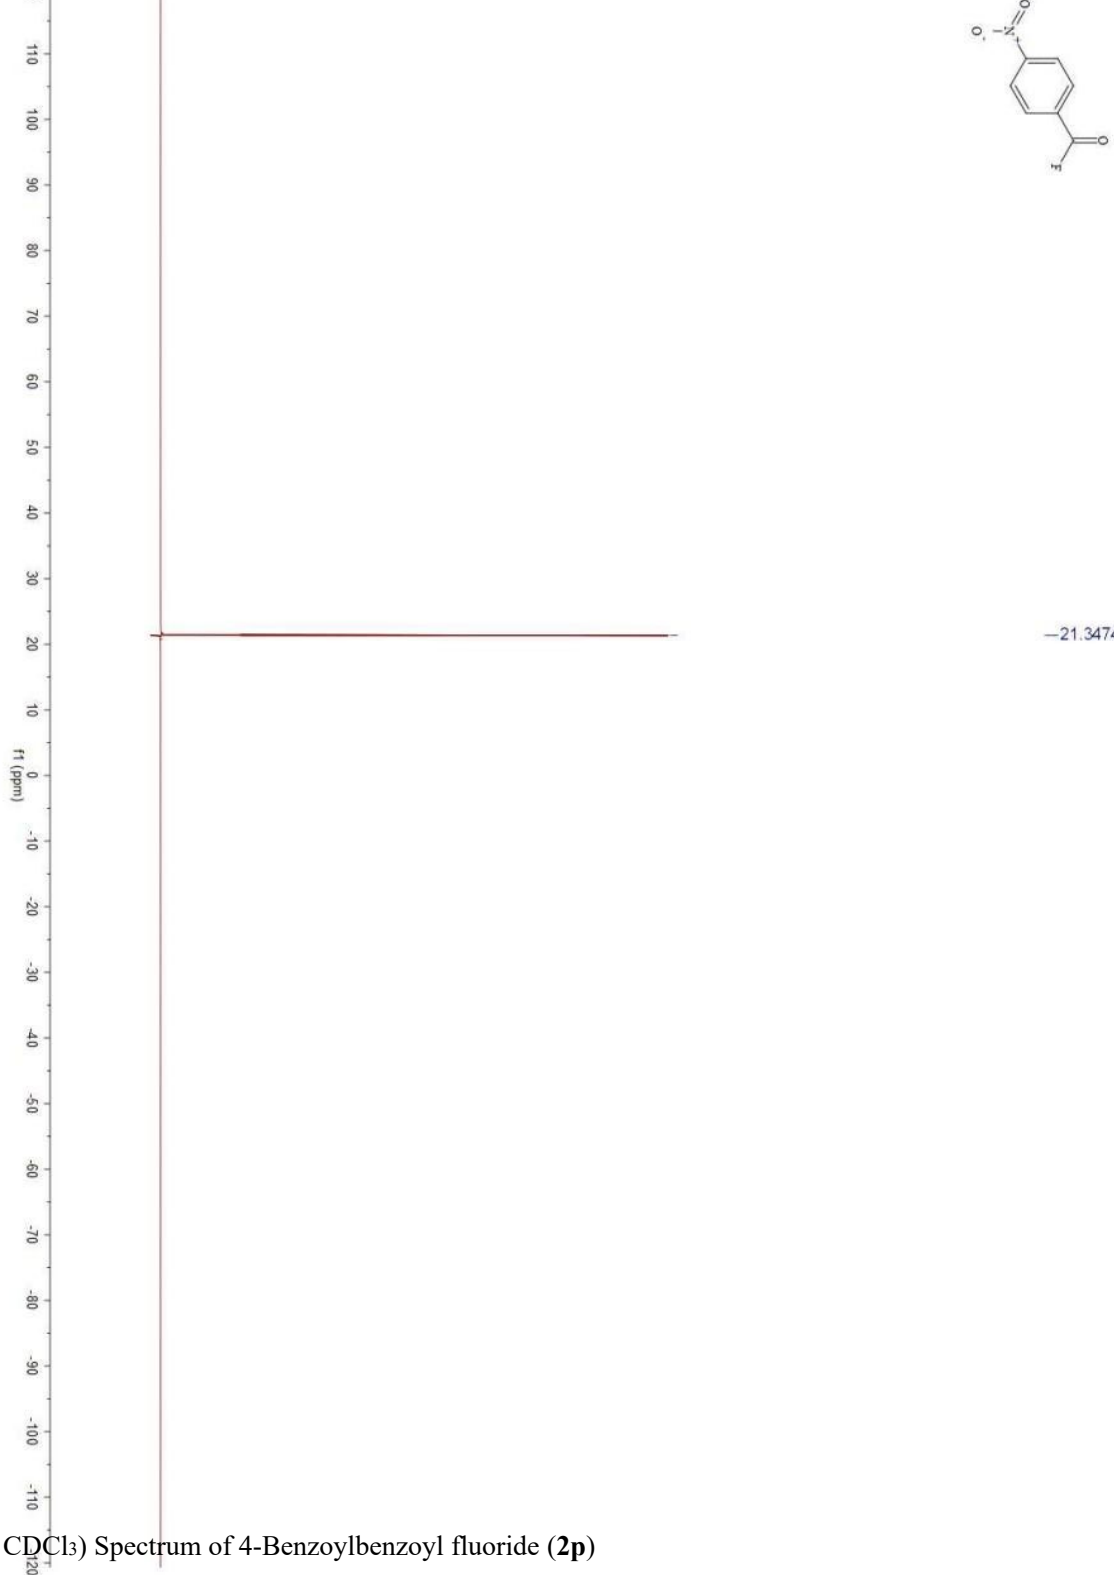



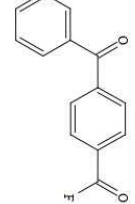

$^{13}\text{C}$  NMR (101 MHz,  $\text{CDCl}_3$ ) Spectrum of 4-Benzoylbenzoyl fluoride (**2p**)

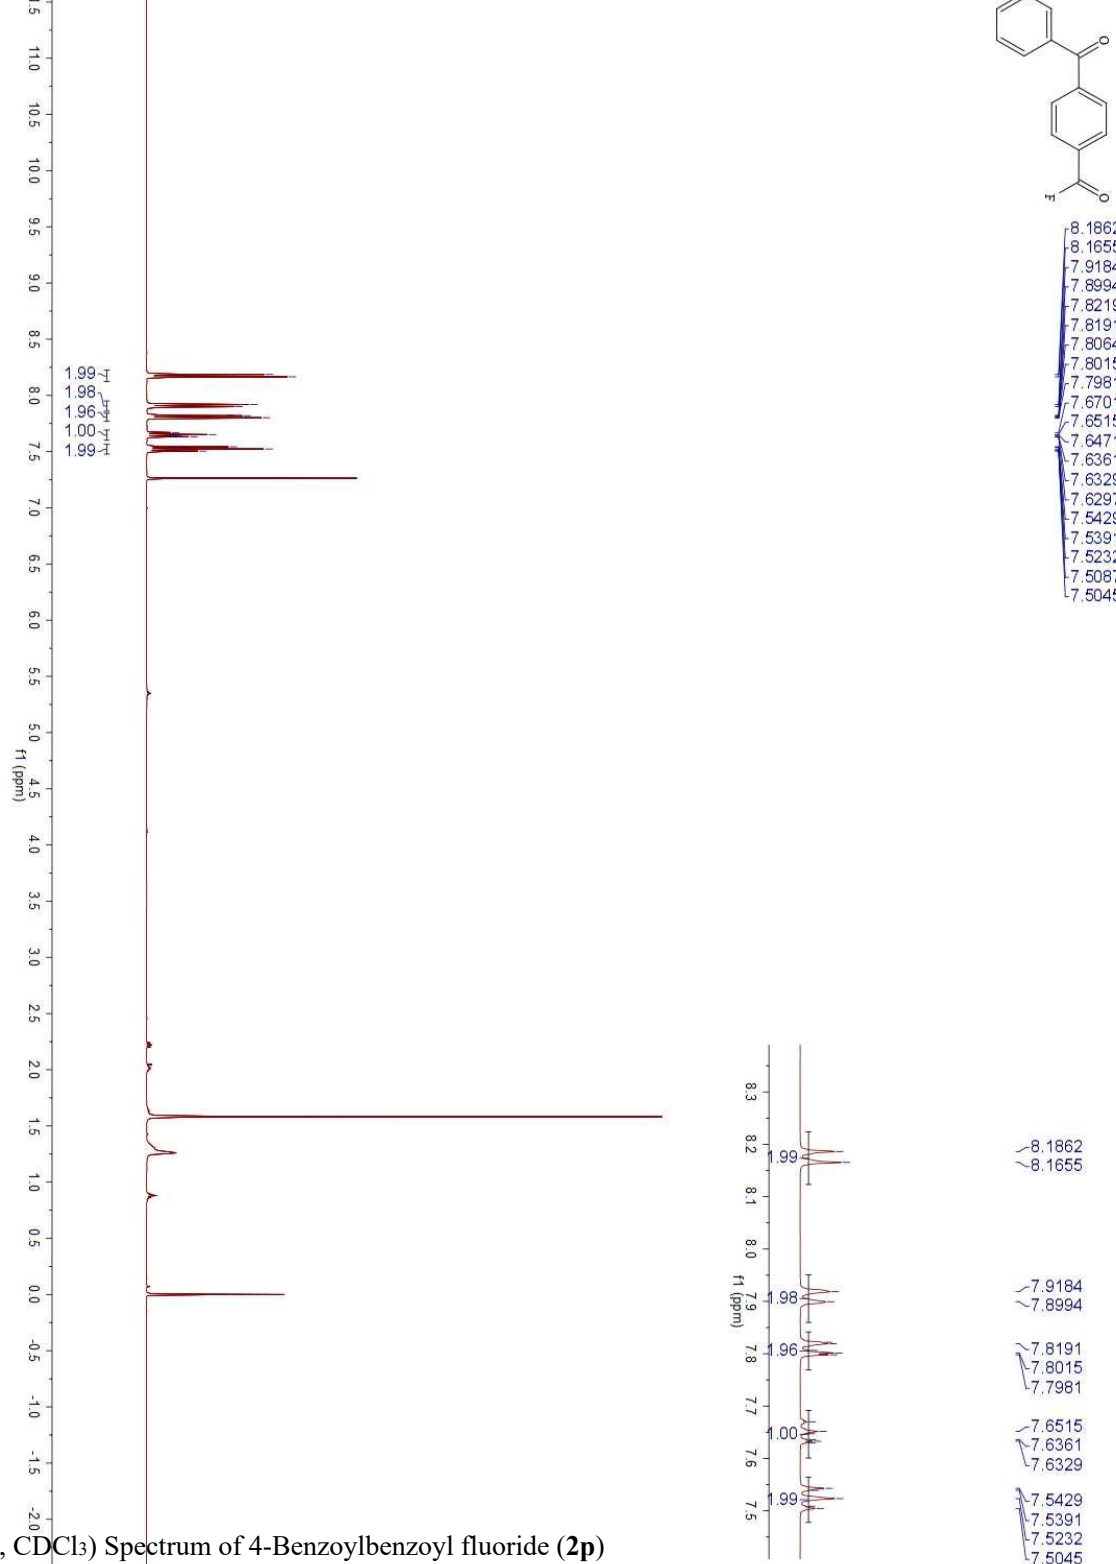

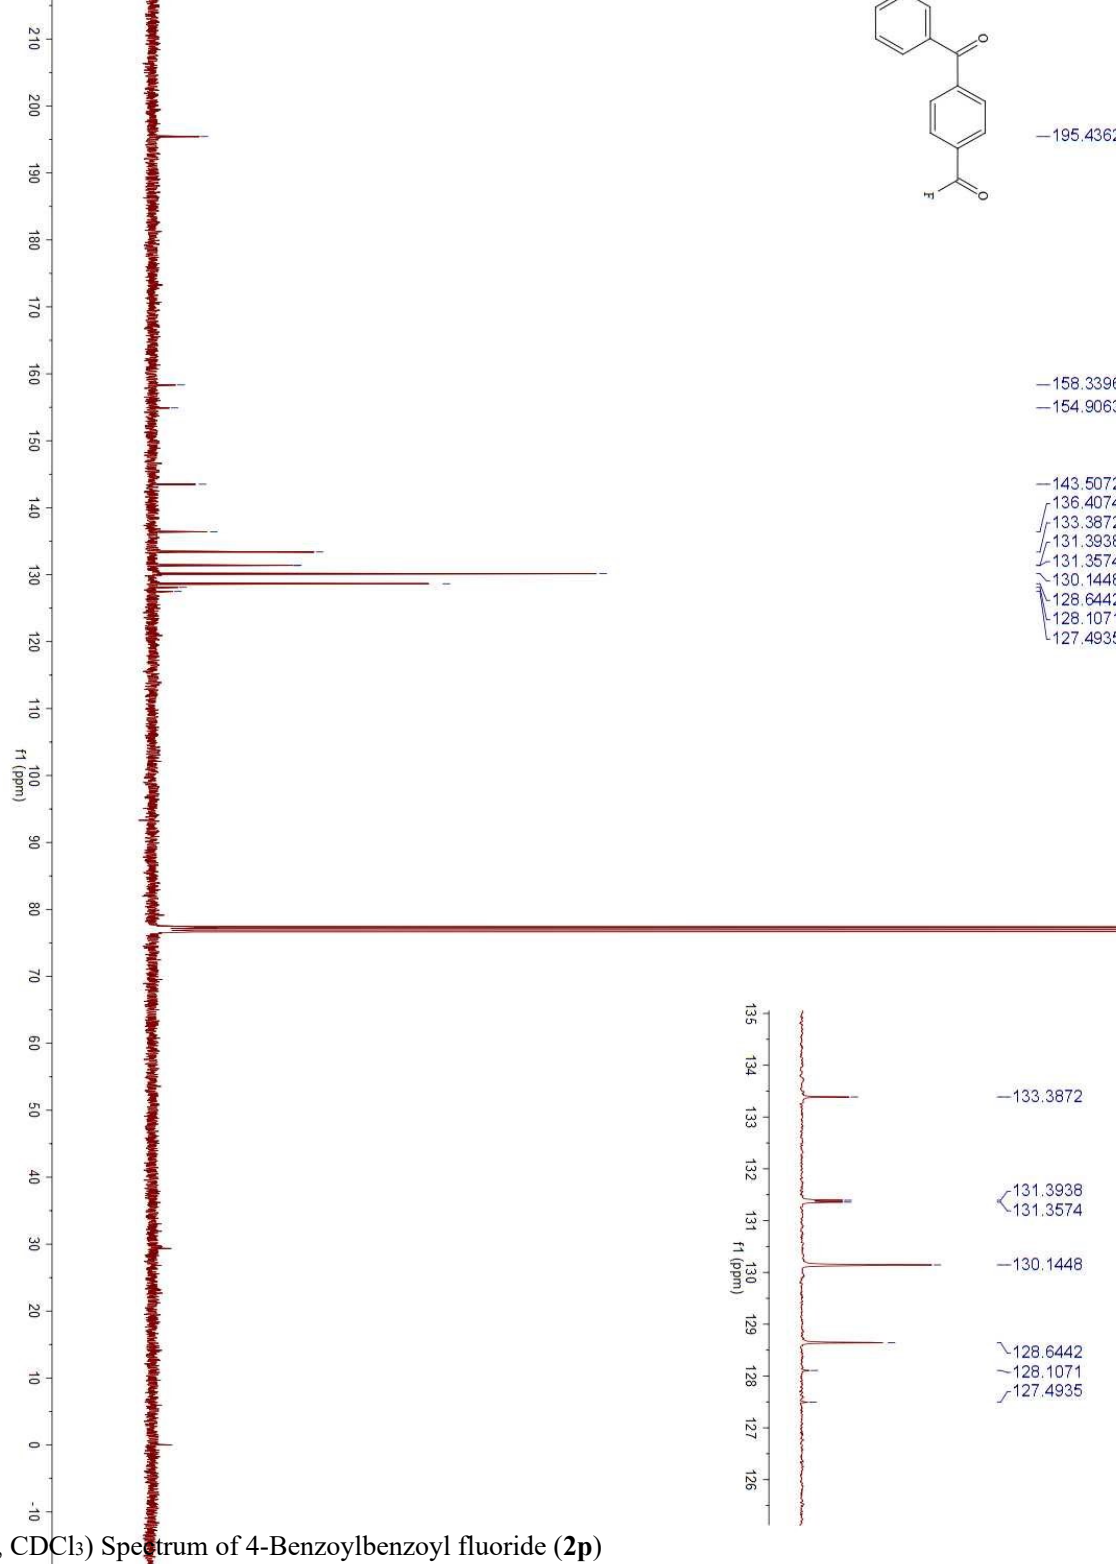

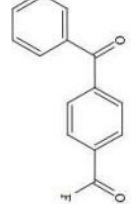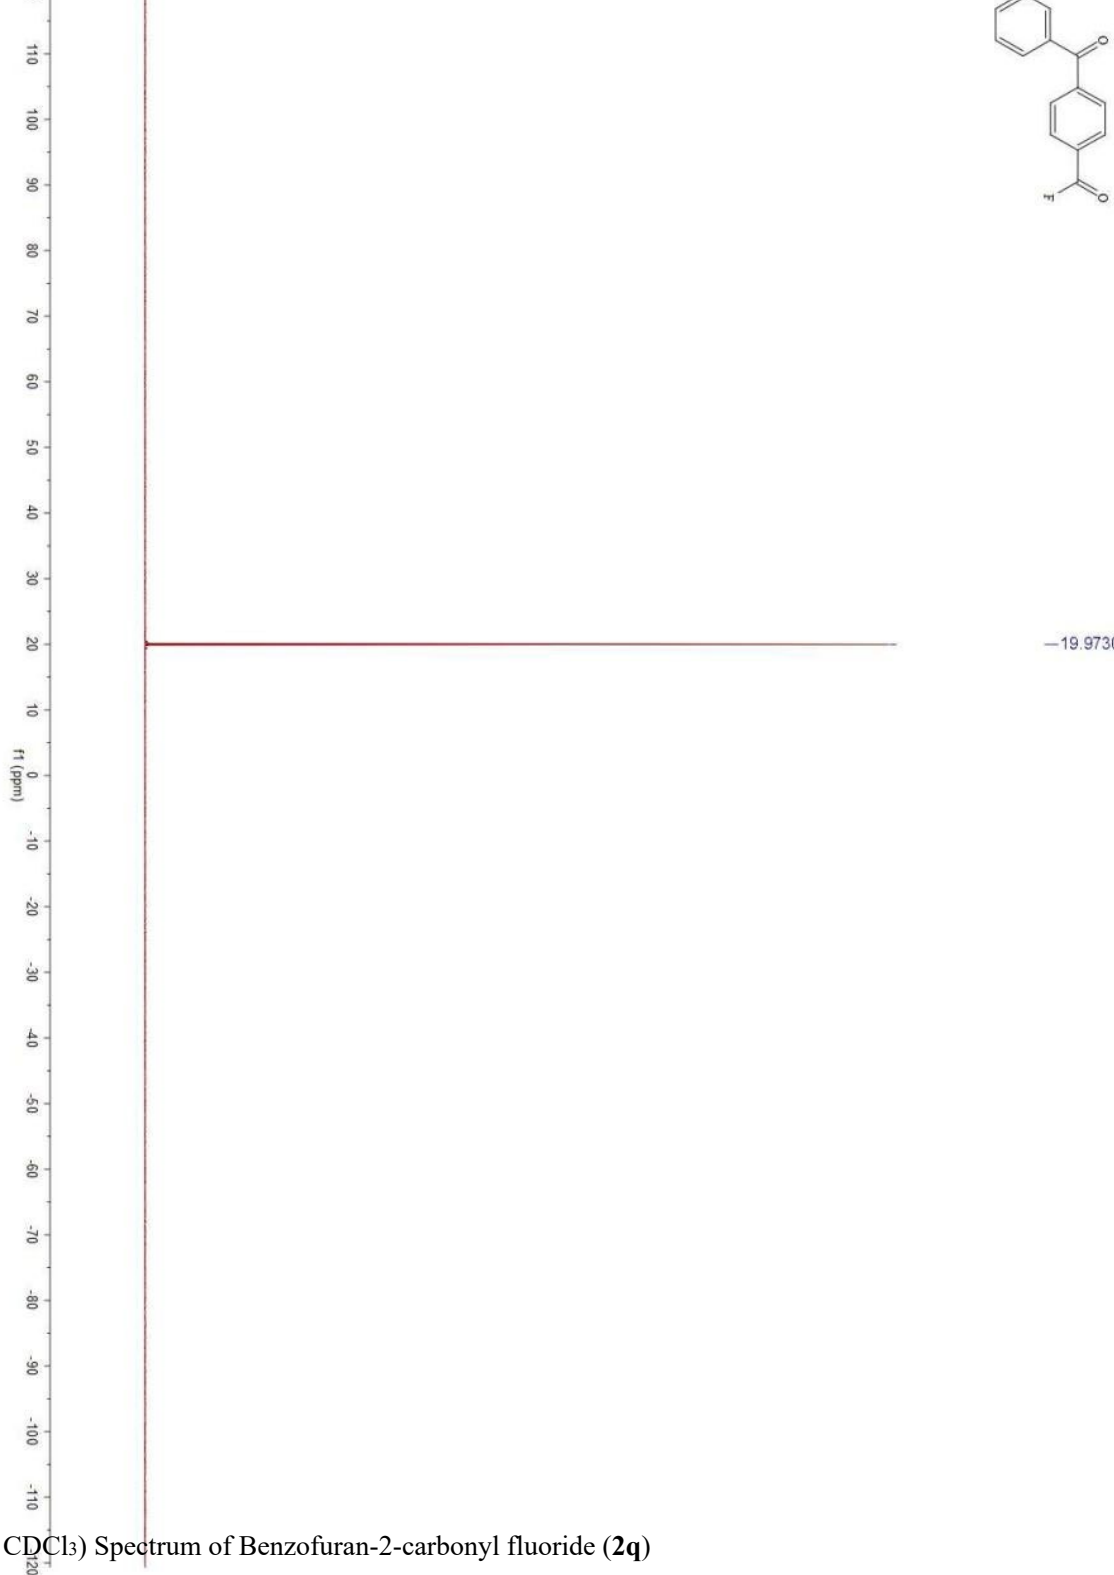

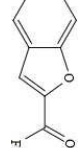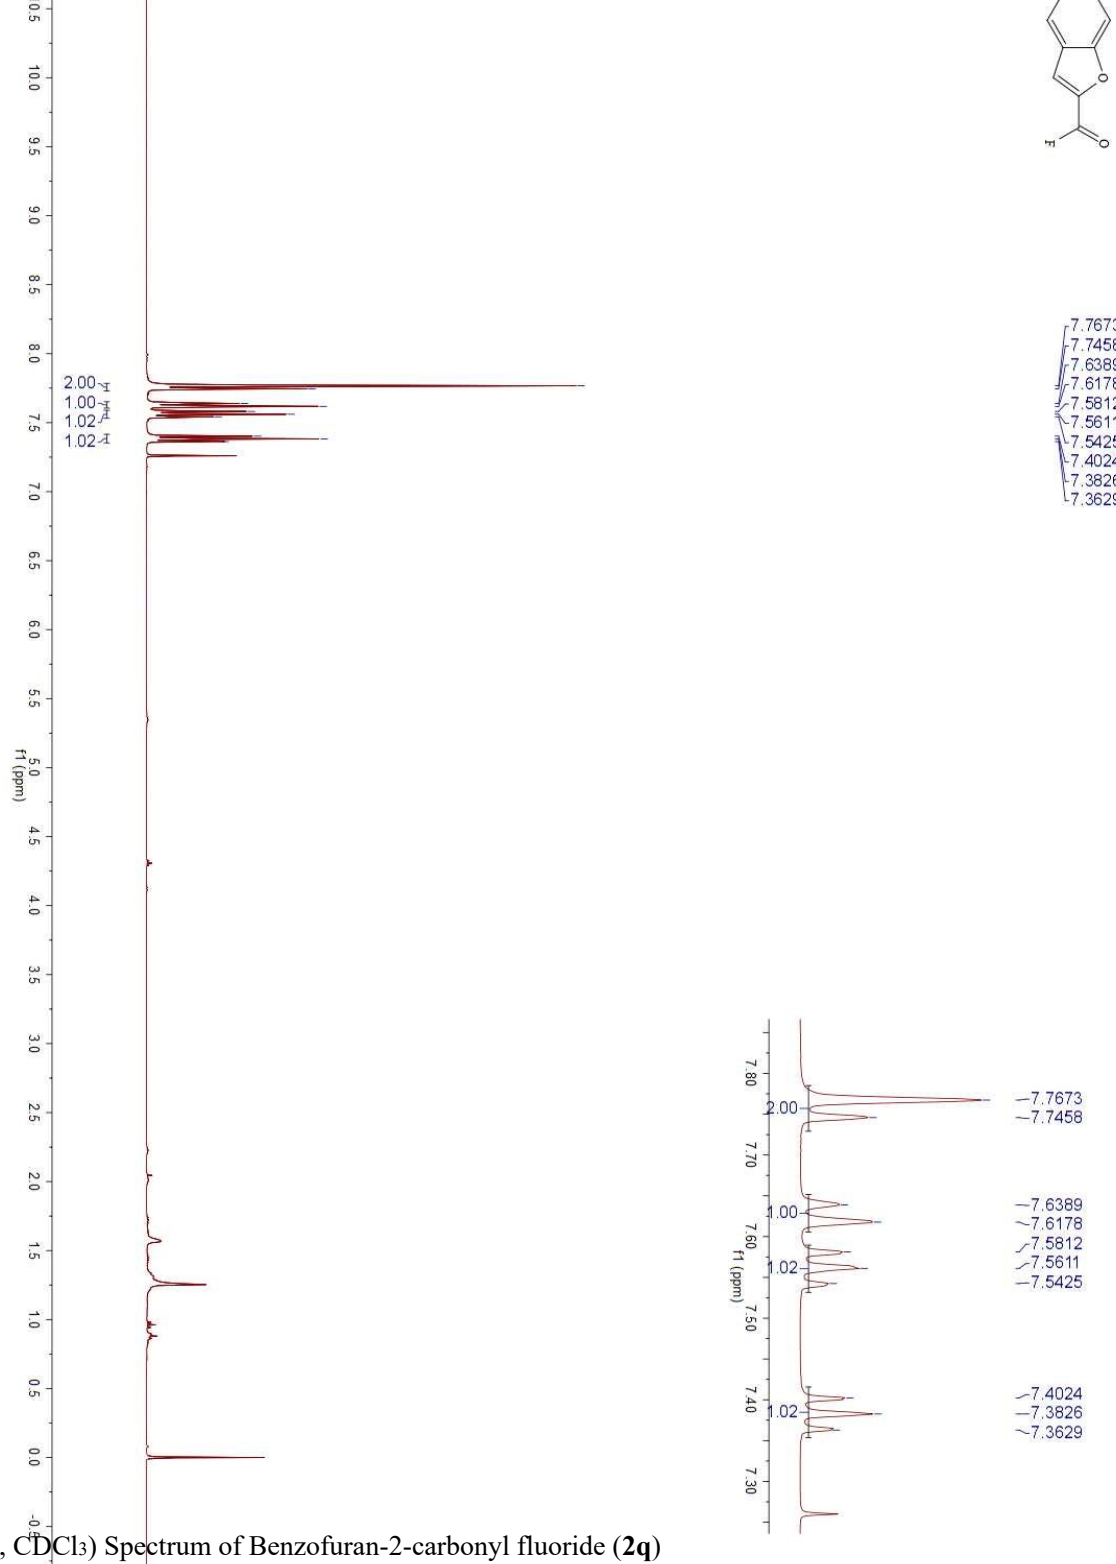

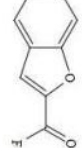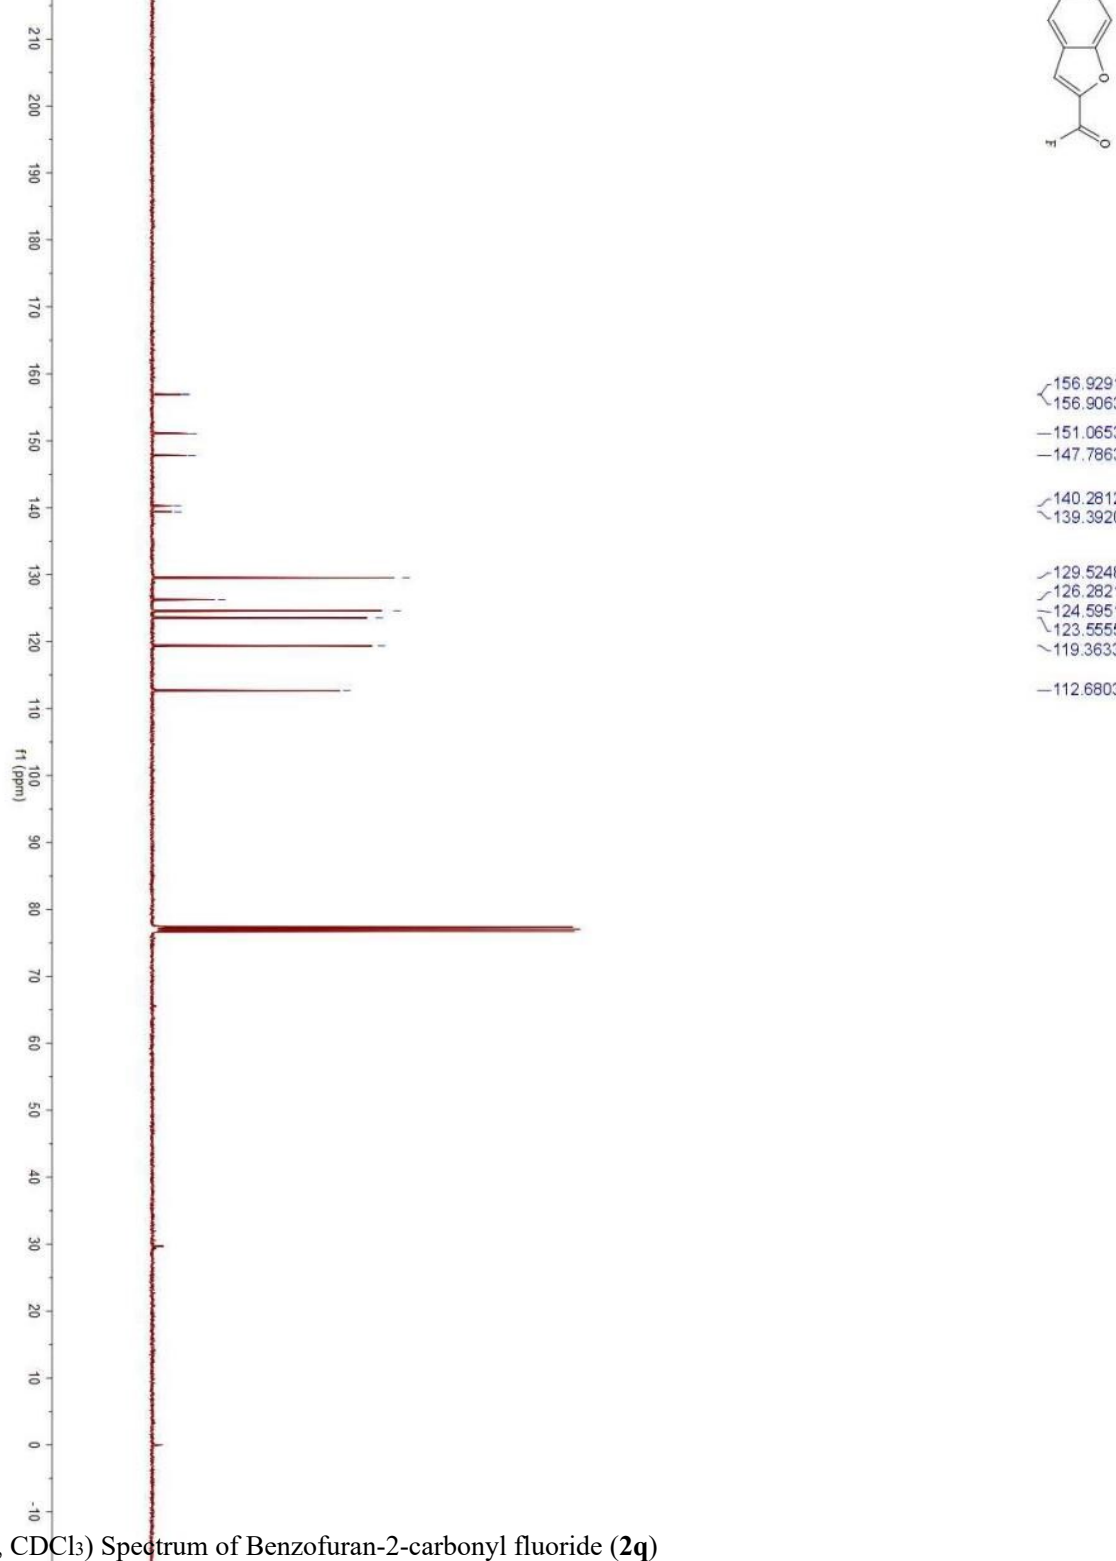

$^{19}\text{F}$  NMR (376 MHz,  $\text{CDCl}_3$ ) Spectrum of Benzofuran-2-carbonyl fluoride (**2q**)

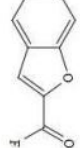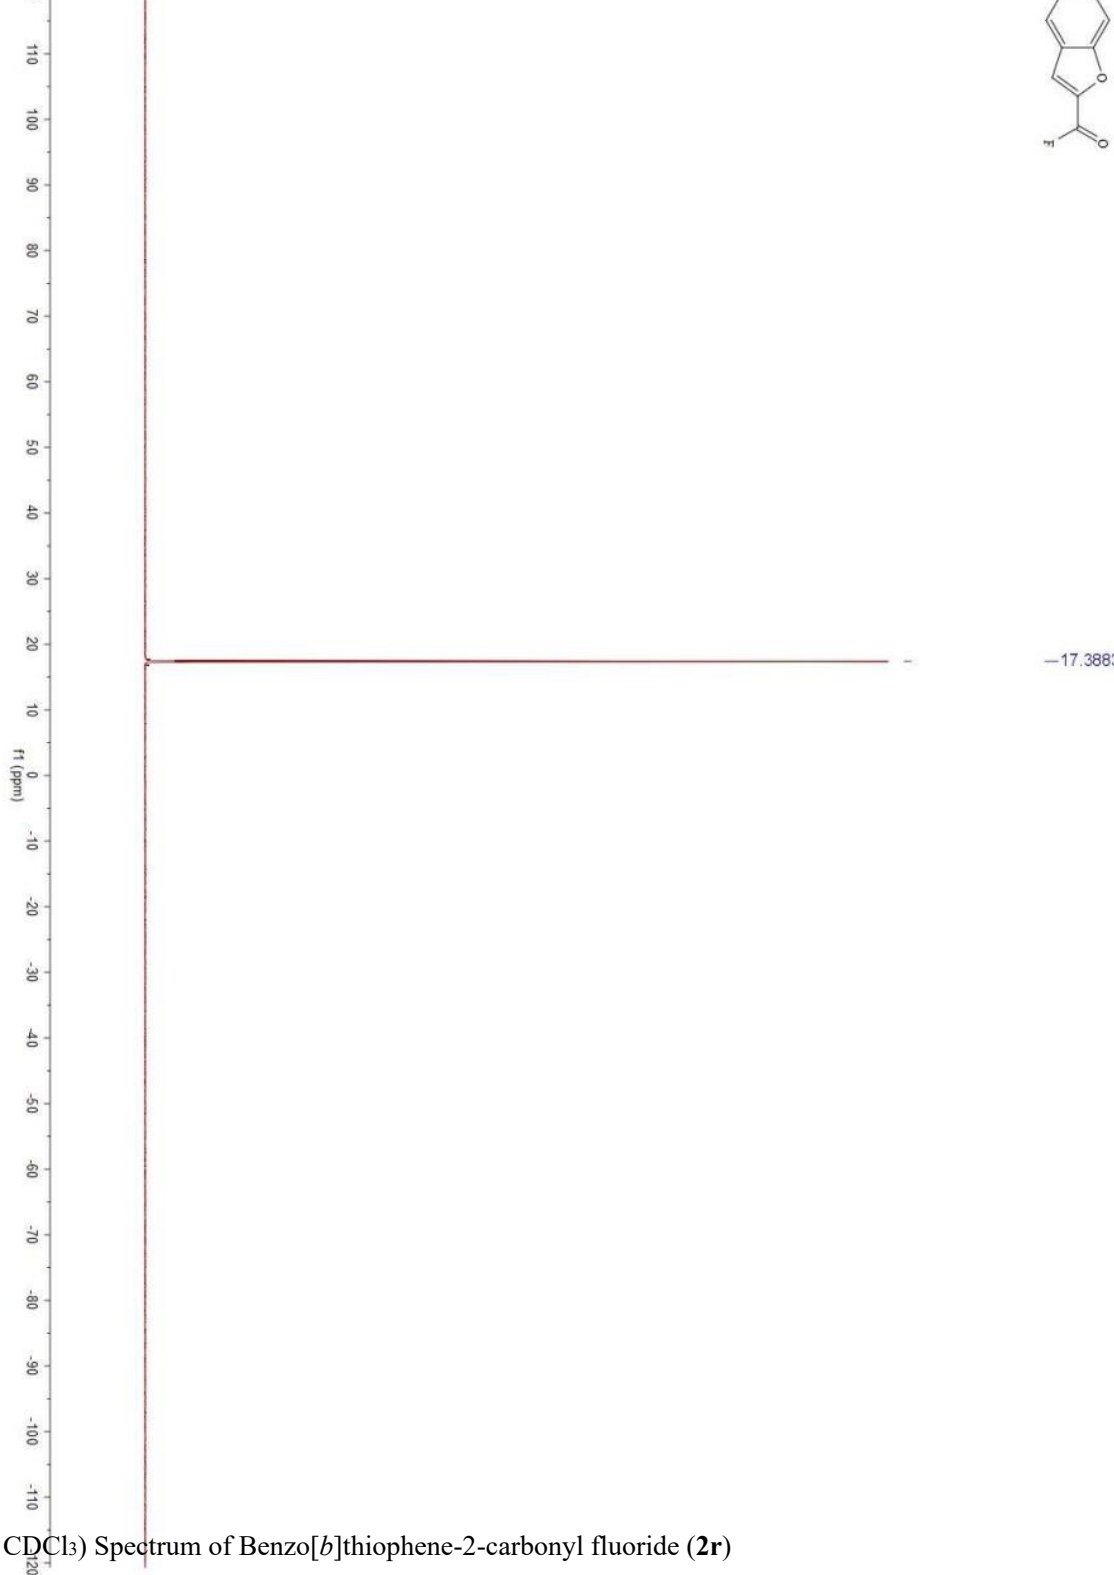

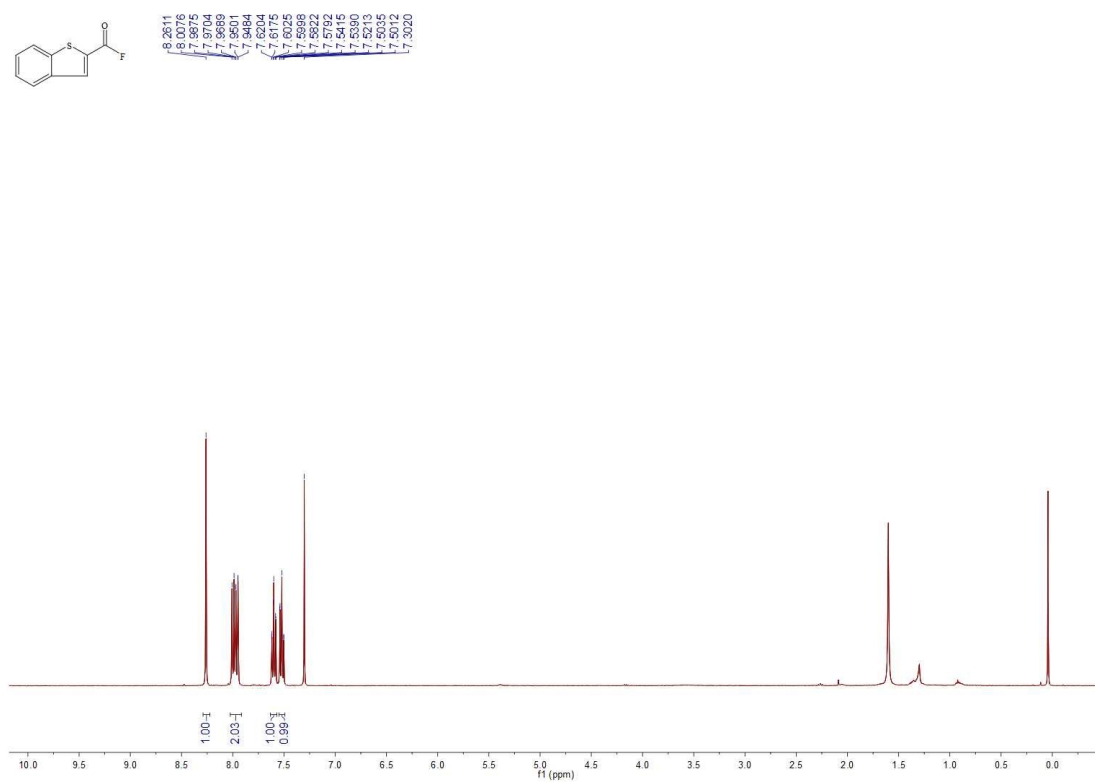

<sup>13</sup>C NMR (101 MHz, CDCl<sub>3</sub>) Spectrum of Benzo[*b*]thiophene-2-carbonyl fluoride (**2r**)

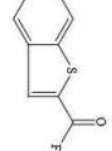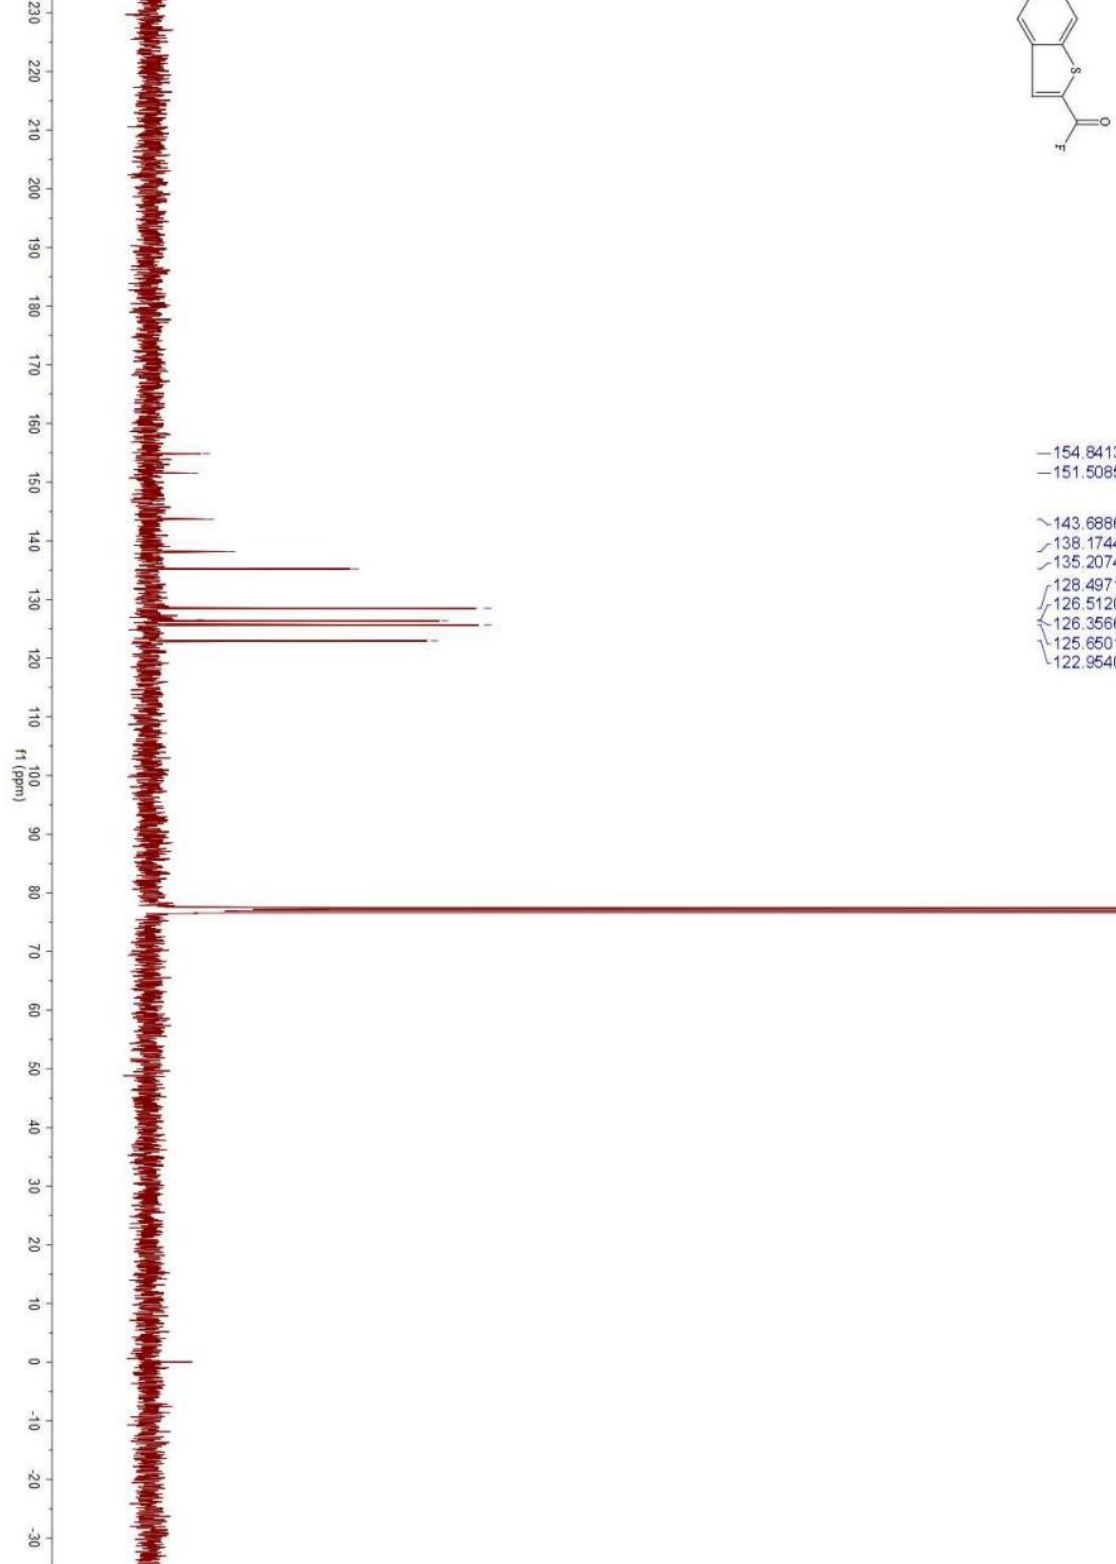

$^{19}\text{F}$  NMR (376 MHz,  $\text{CDCl}_3$ ) Spectrum of Benzo[*b*]thiophene-2-carbonyl fluoride (**2r**)



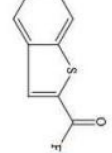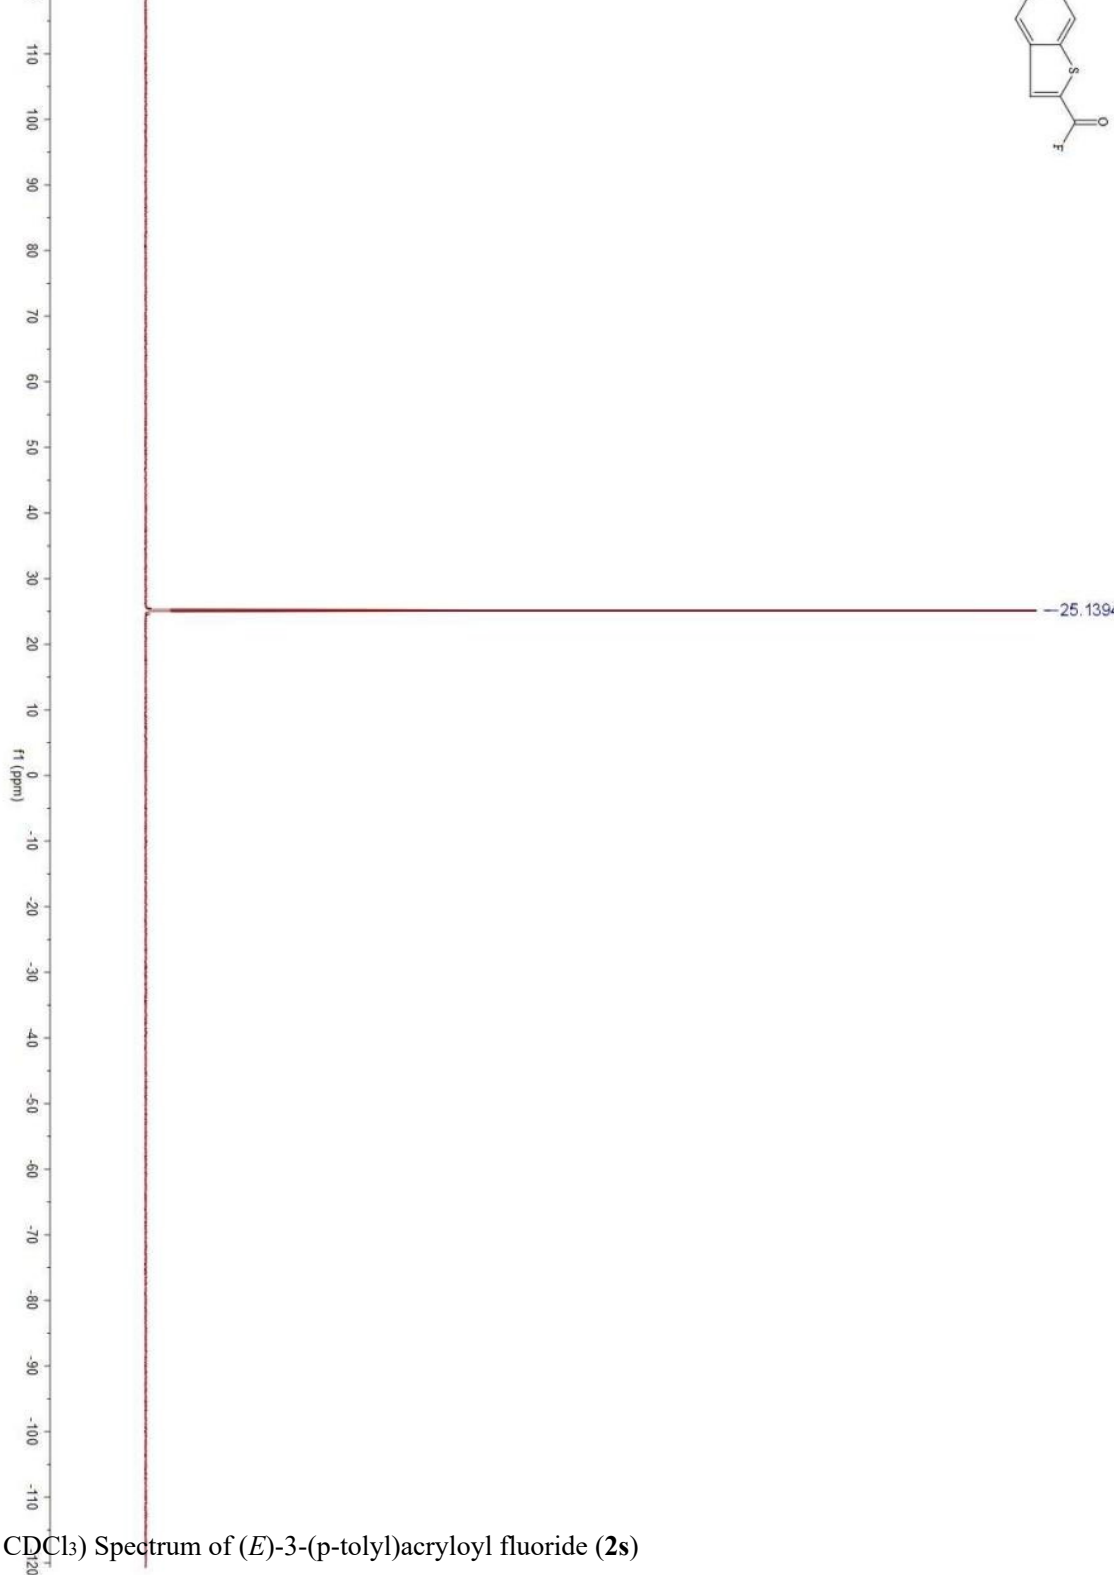

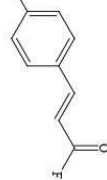

$^{13}\text{C}$  NMR (101 MHz,  $\text{CDCl}_3$ ) Spectrum of (*E*)-3-(*p*-tolyl)acryloyl fluoride (**2s**)

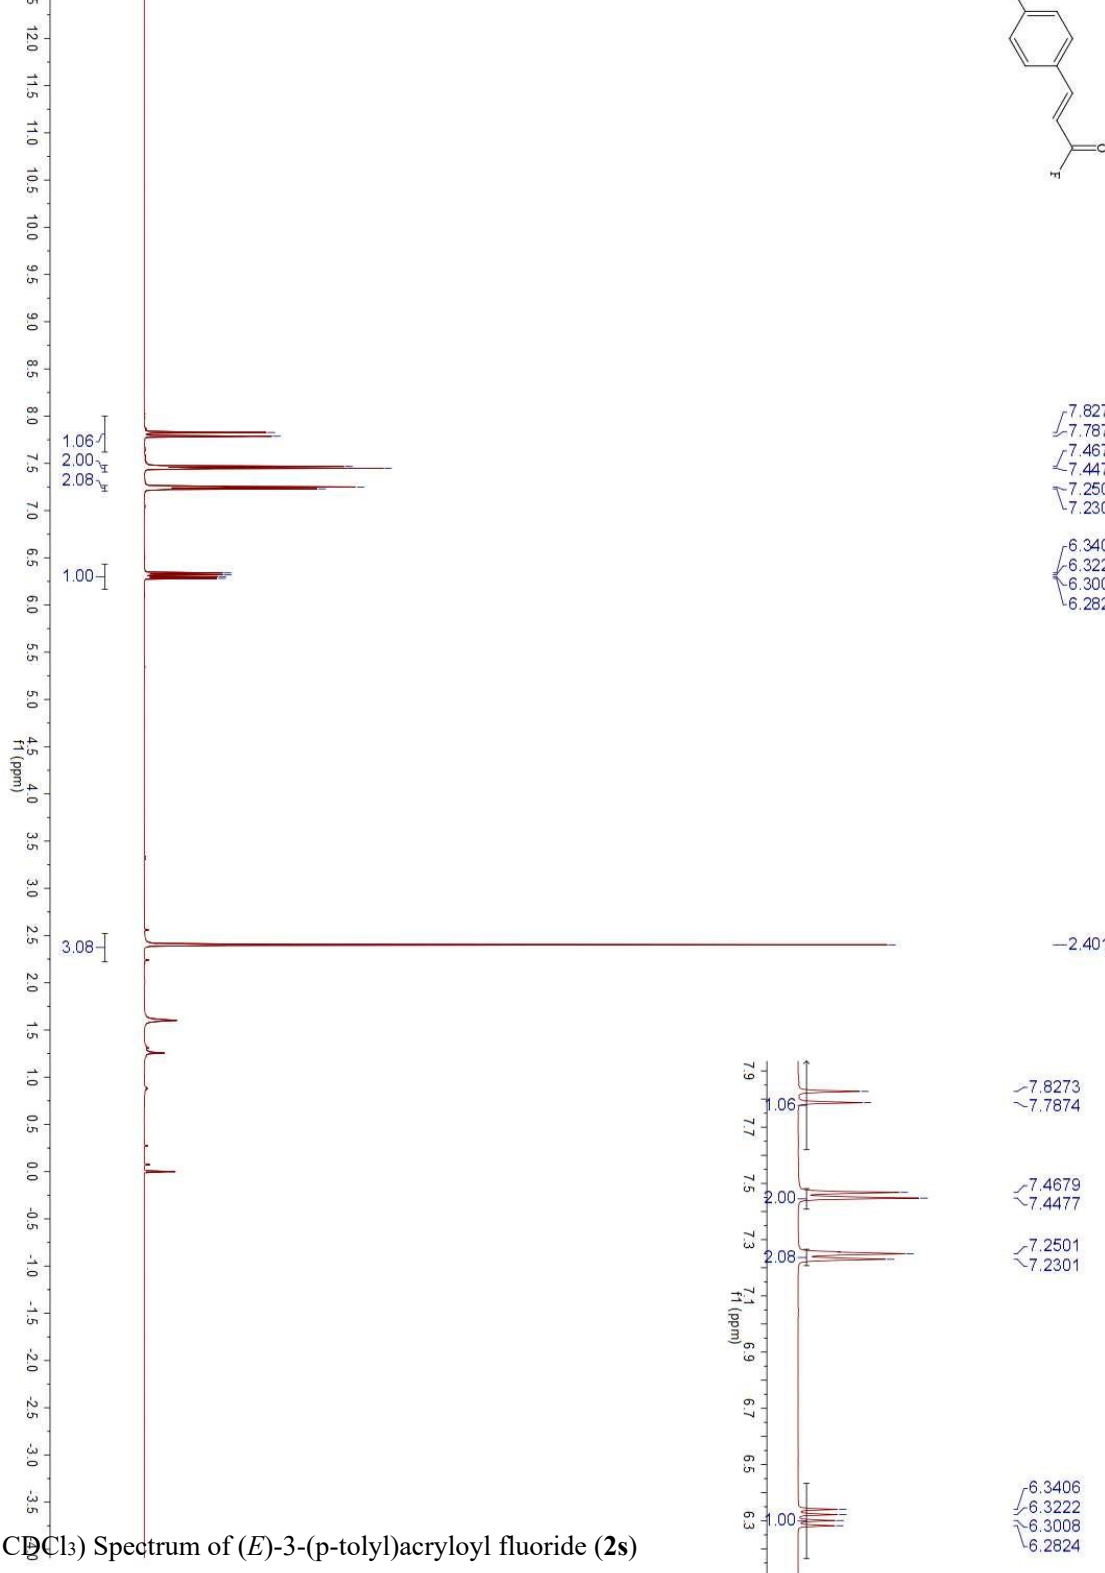

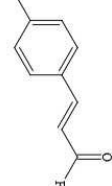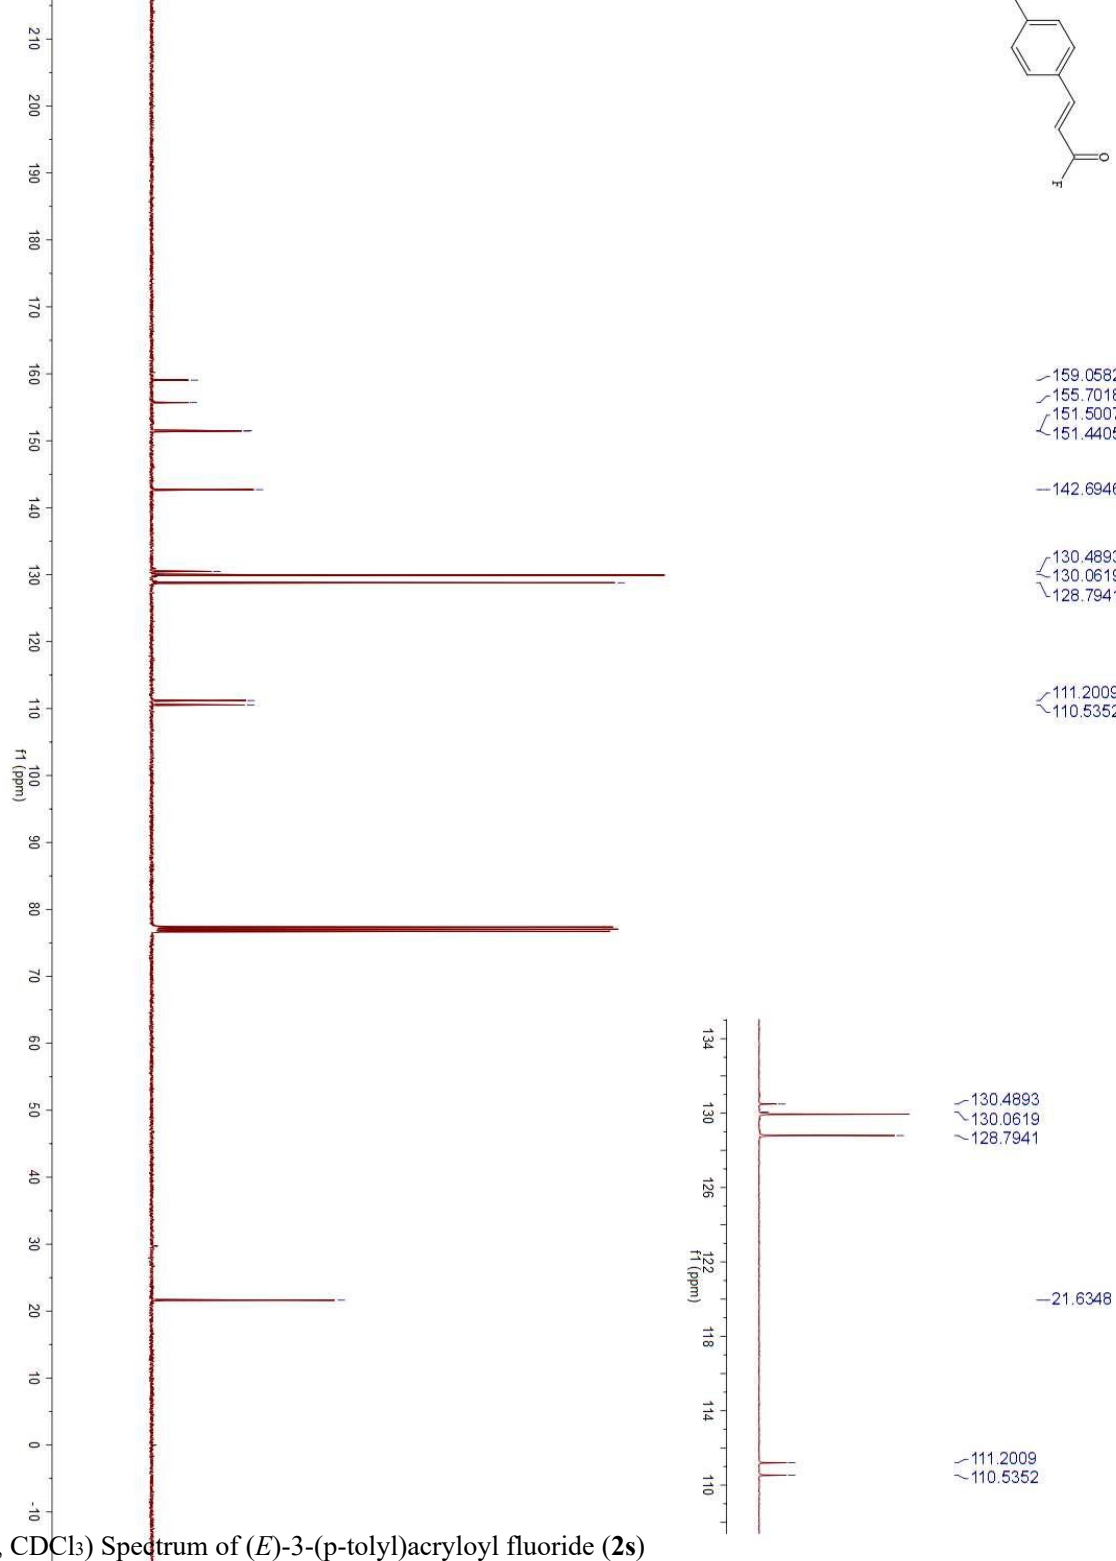

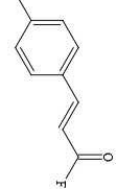

—25.082

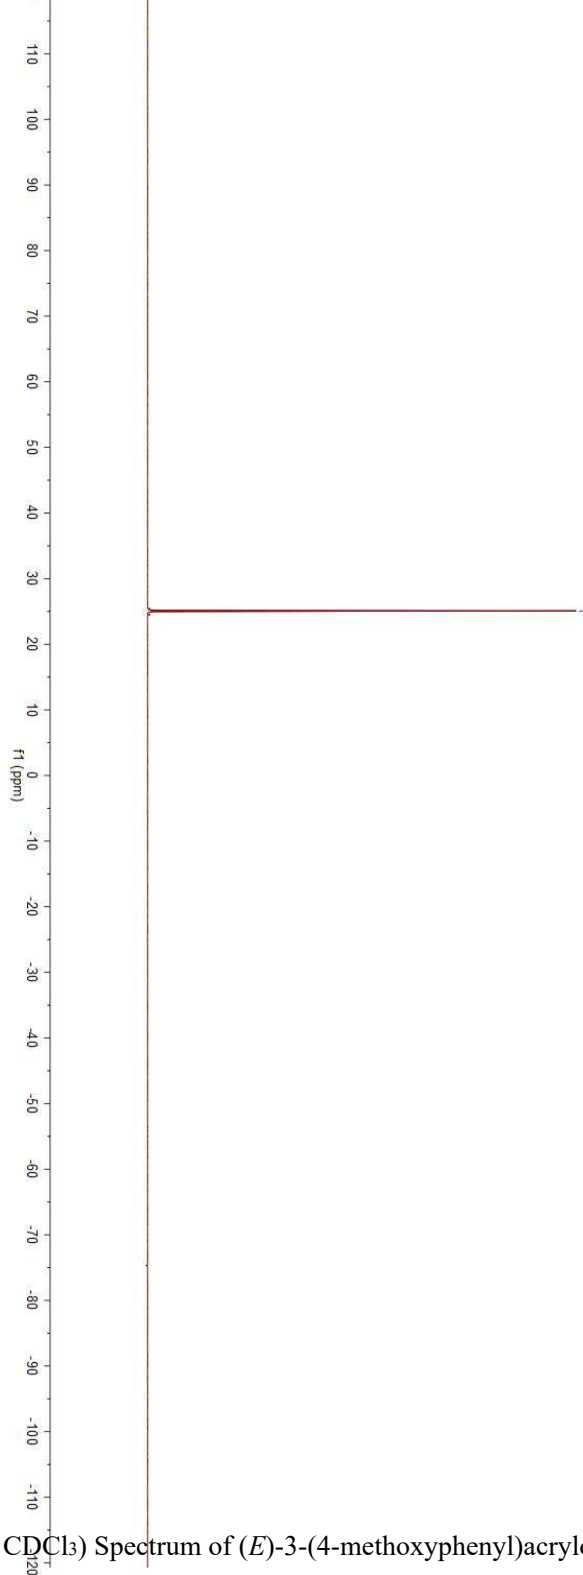

$^1\text{H}$  NMR (400 MHz,  $\text{CDCl}_3$ ) Spectrum of (*E*)-3-(4-methoxyphenyl)acryloyl fluoride (**2t**)

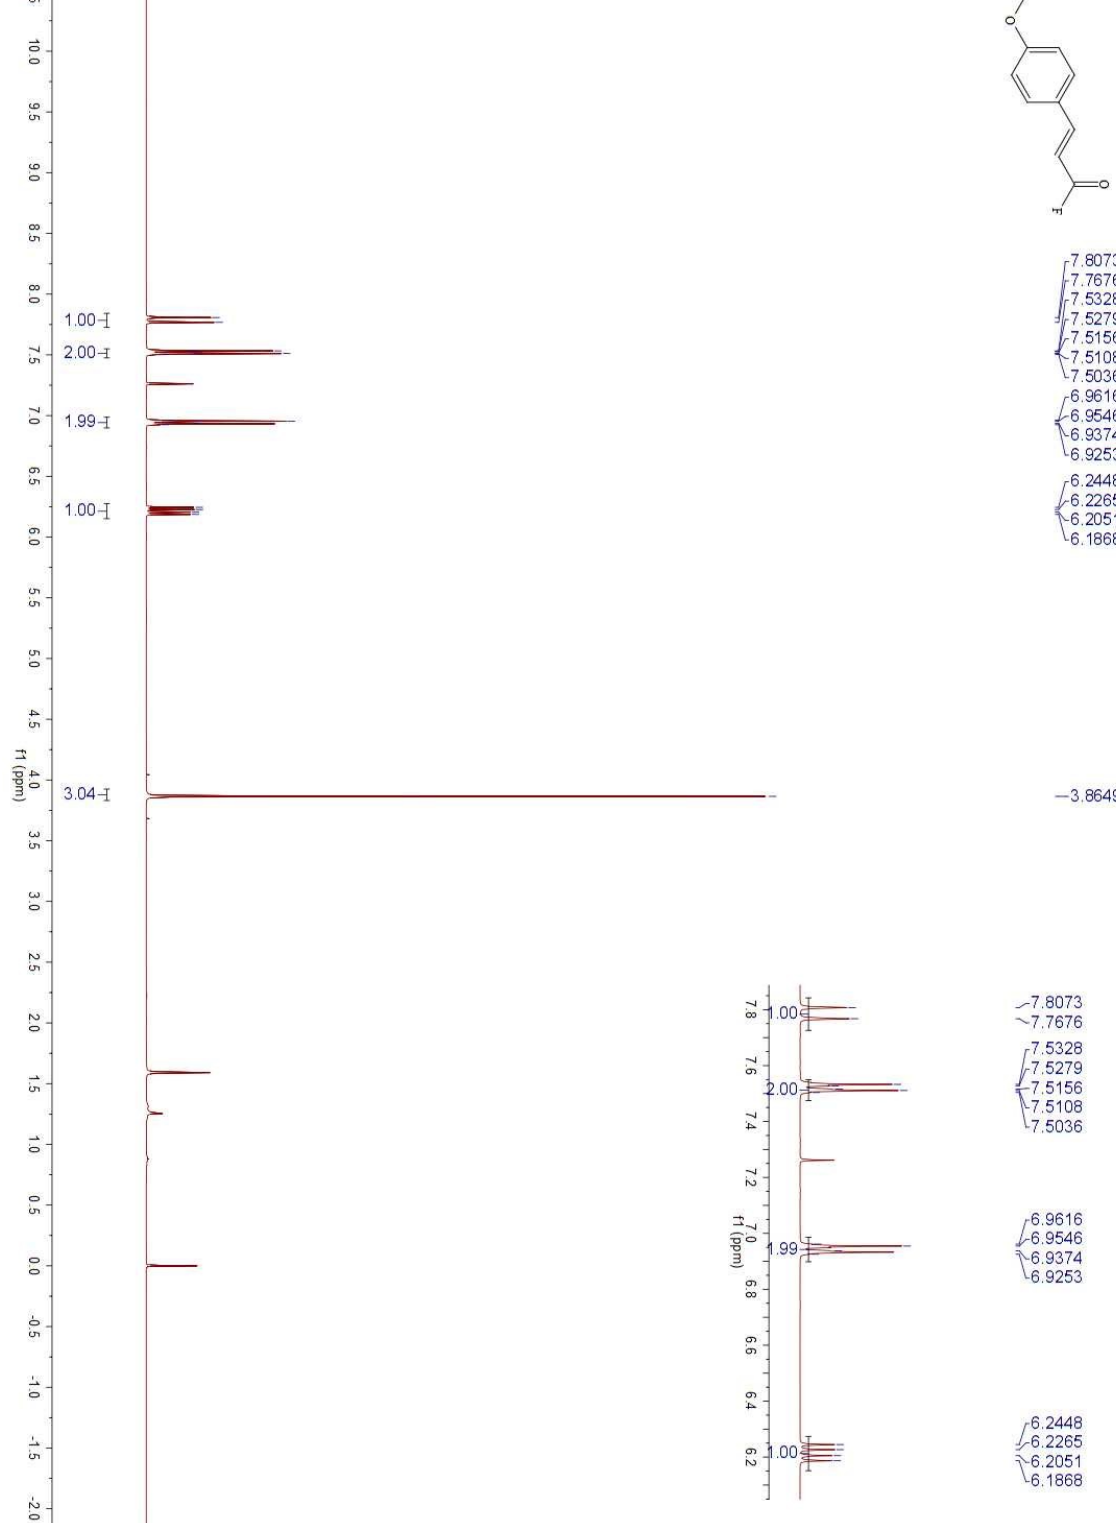

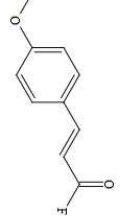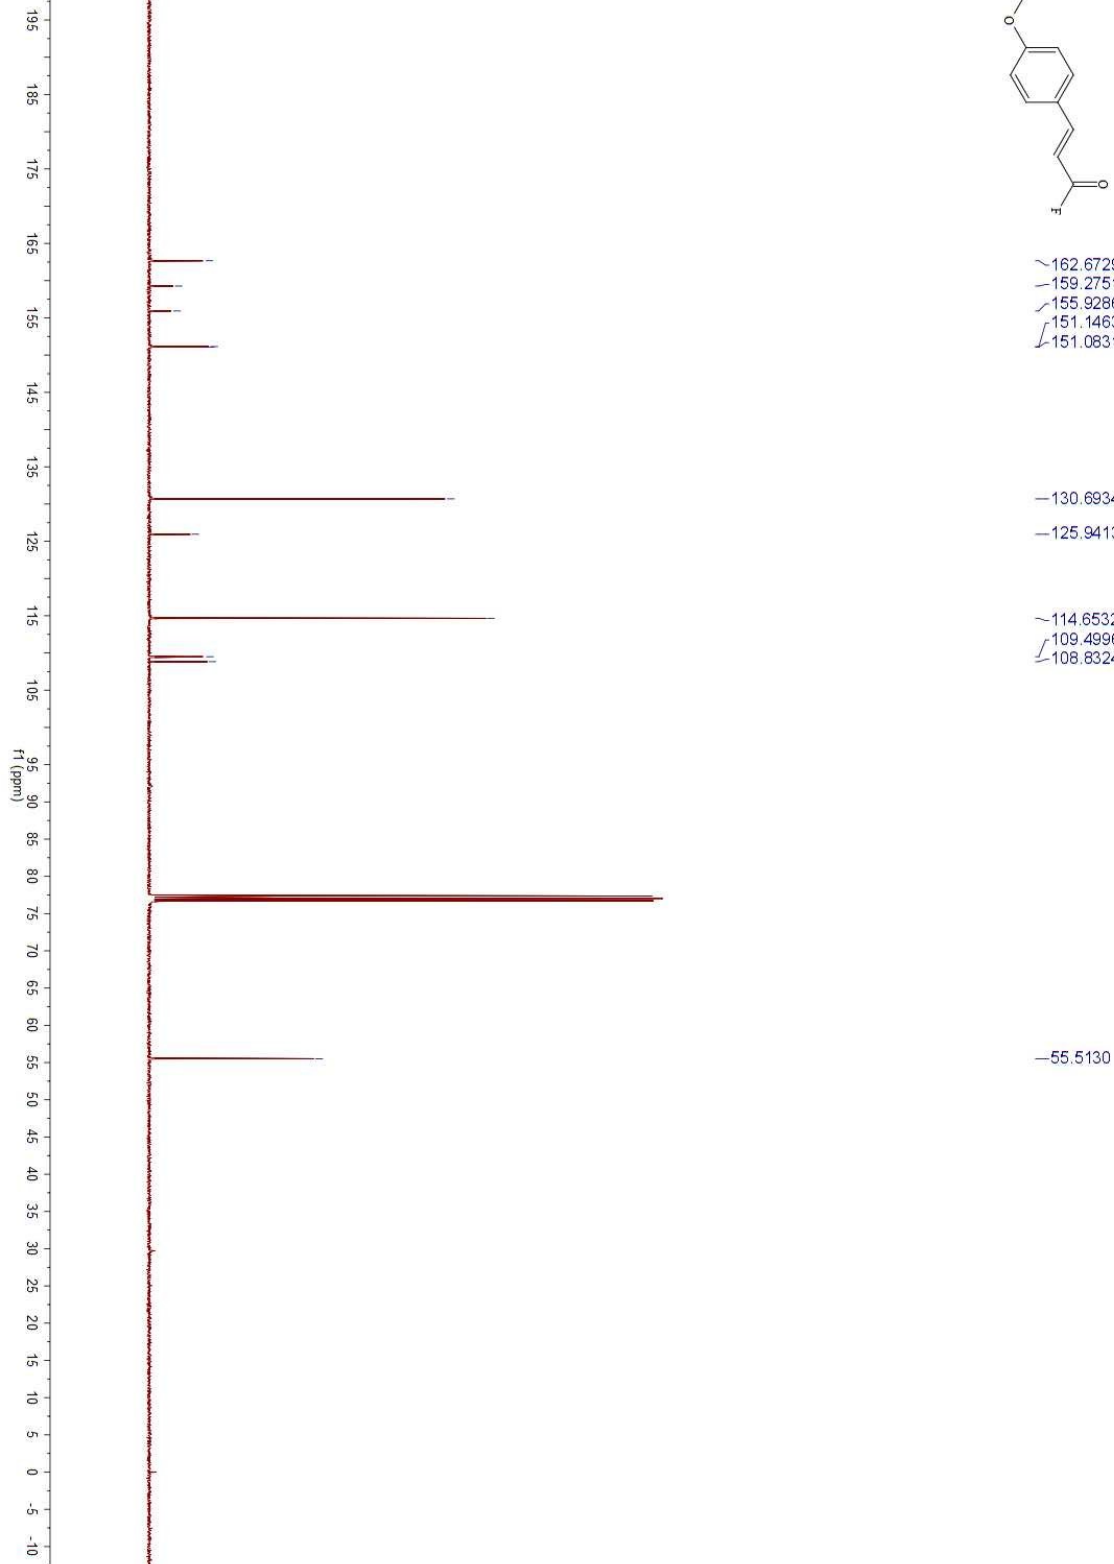

$^{19}\text{F}$  NMR (376 MHz,  $\text{CDCl}_3$ ) Spectrum of (*E*)-3-(4-methoxyphenyl)acryloyl fluoride (**2t**)

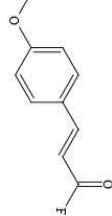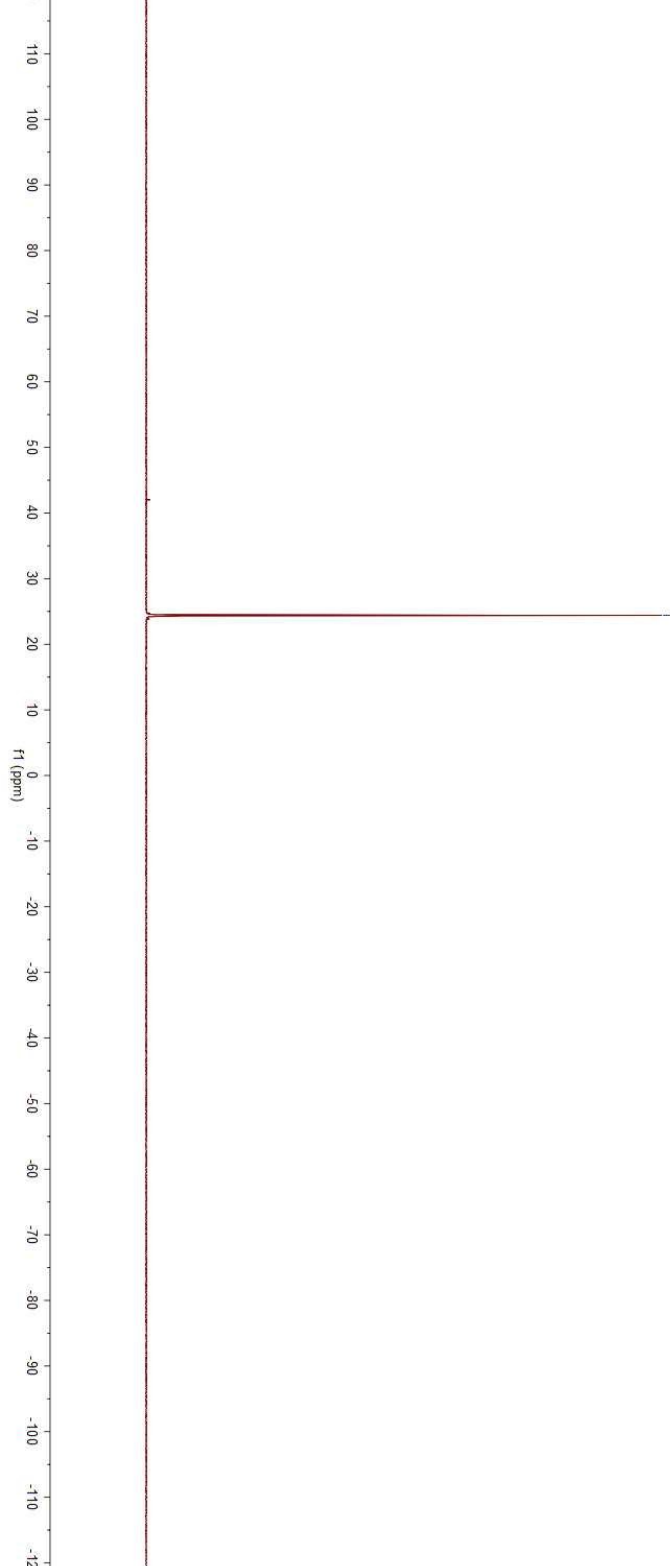

—24.397

$^1\text{H}$  NMR (400 MHz,  $\text{CDCl}_3$ ) Spectrum of (*E*)-3-(4-bromophenyl)acryloyl fluoride (**2u**)

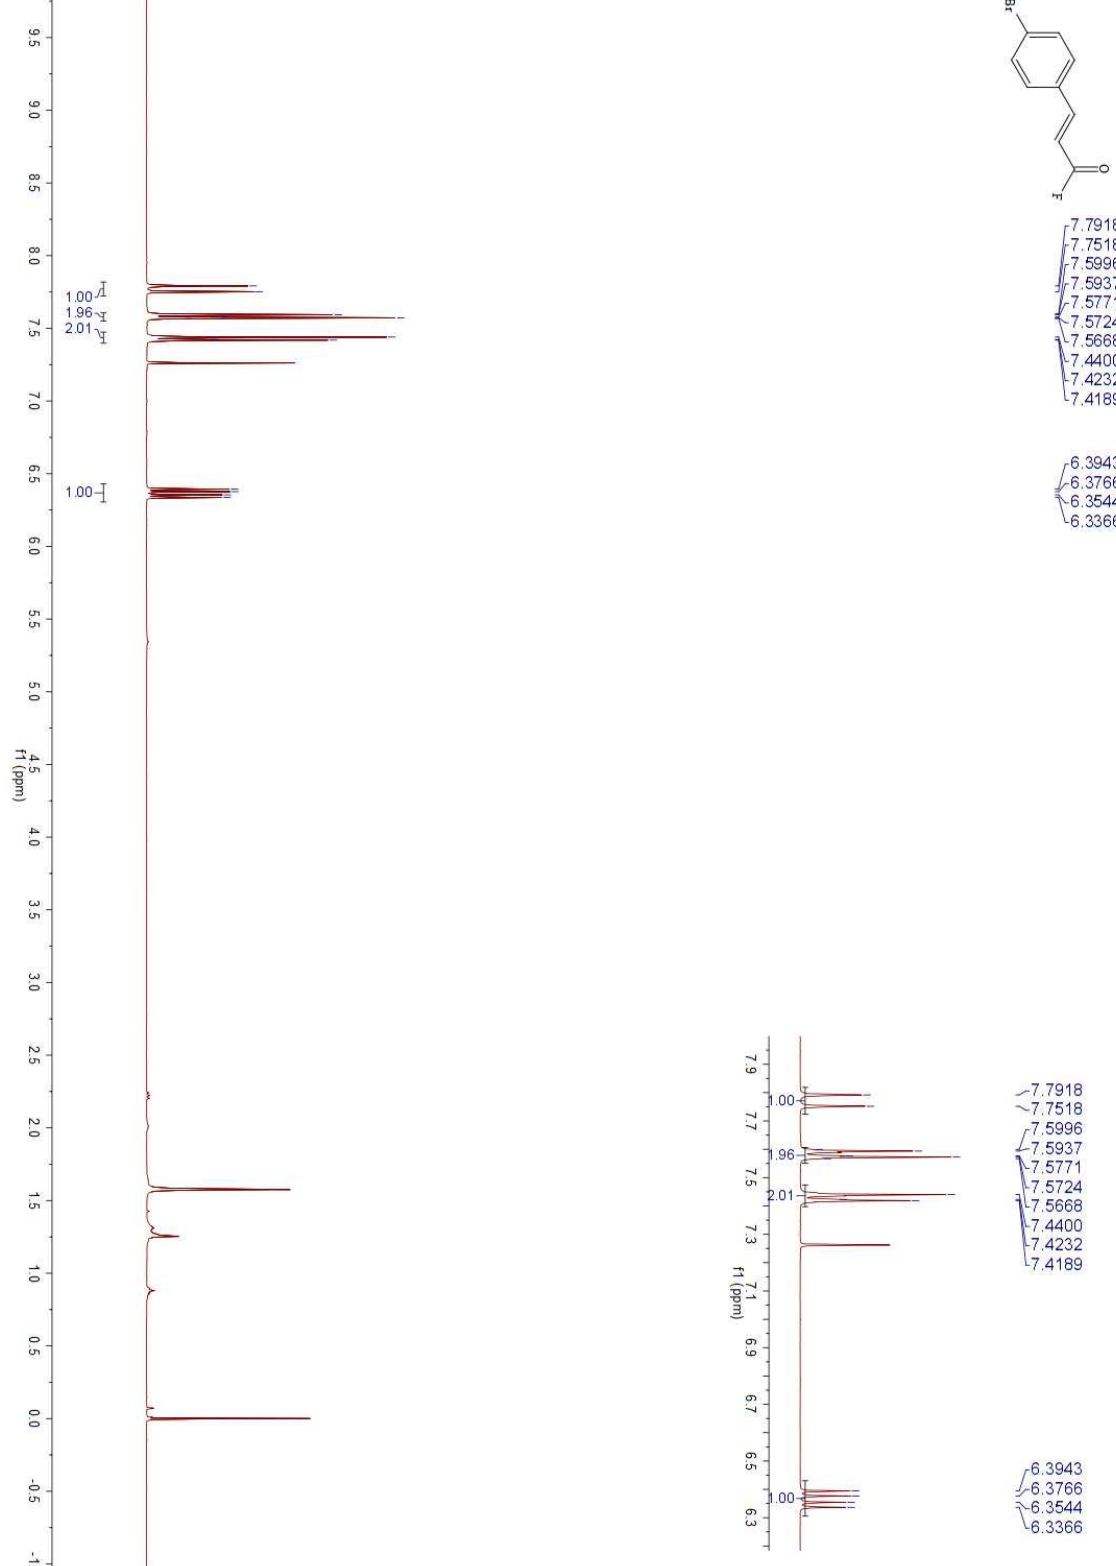



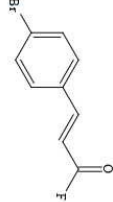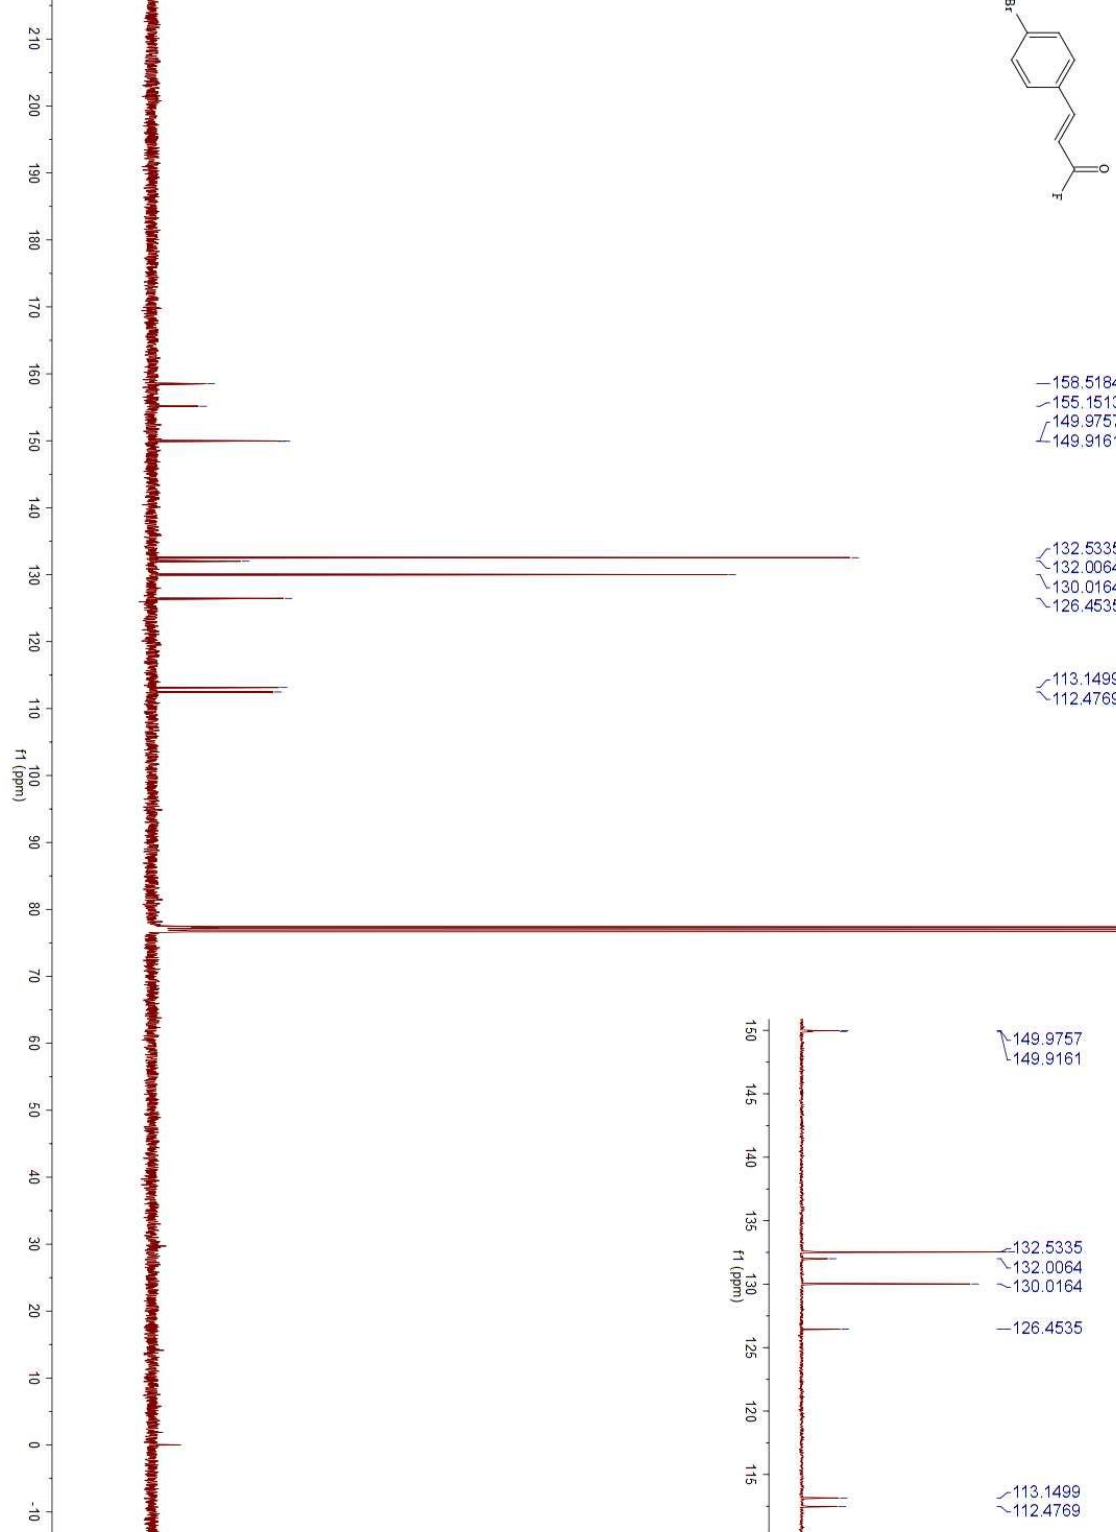

<sup>19</sup>F NMR (376 MHz, CDCl<sub>3</sub>) Spectrum of (*E*)-3-(4-bromophenyl)acryloyl fluoride (**2u**)

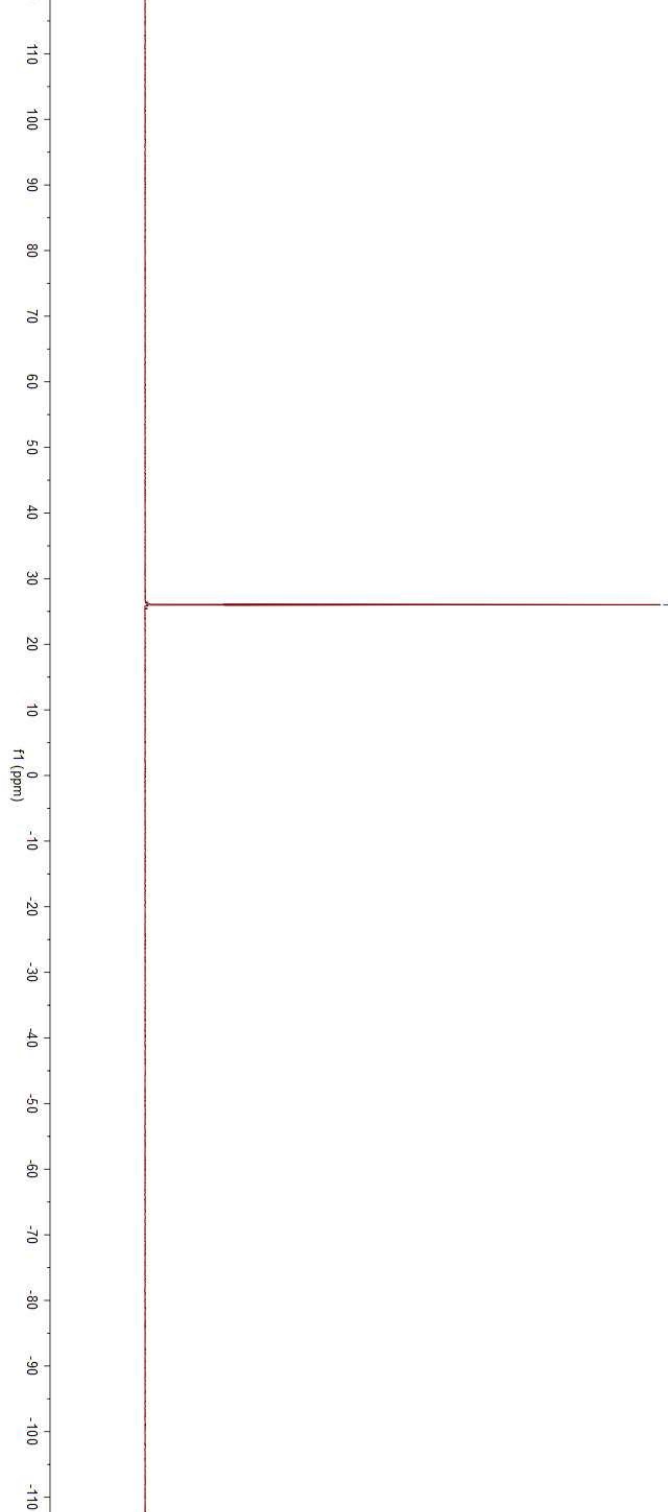

$^1\text{H}$  NMR (400 MHz,  $\text{CDCl}_3$ ) Spectrum of (2E,4E,6E,8E)-3,7-dimethyl-9-(2,6,6-trimethylcyclohex-1-en-1-yl)nona-2,4,6,8-tetraenoyl fluoride (**2v**)

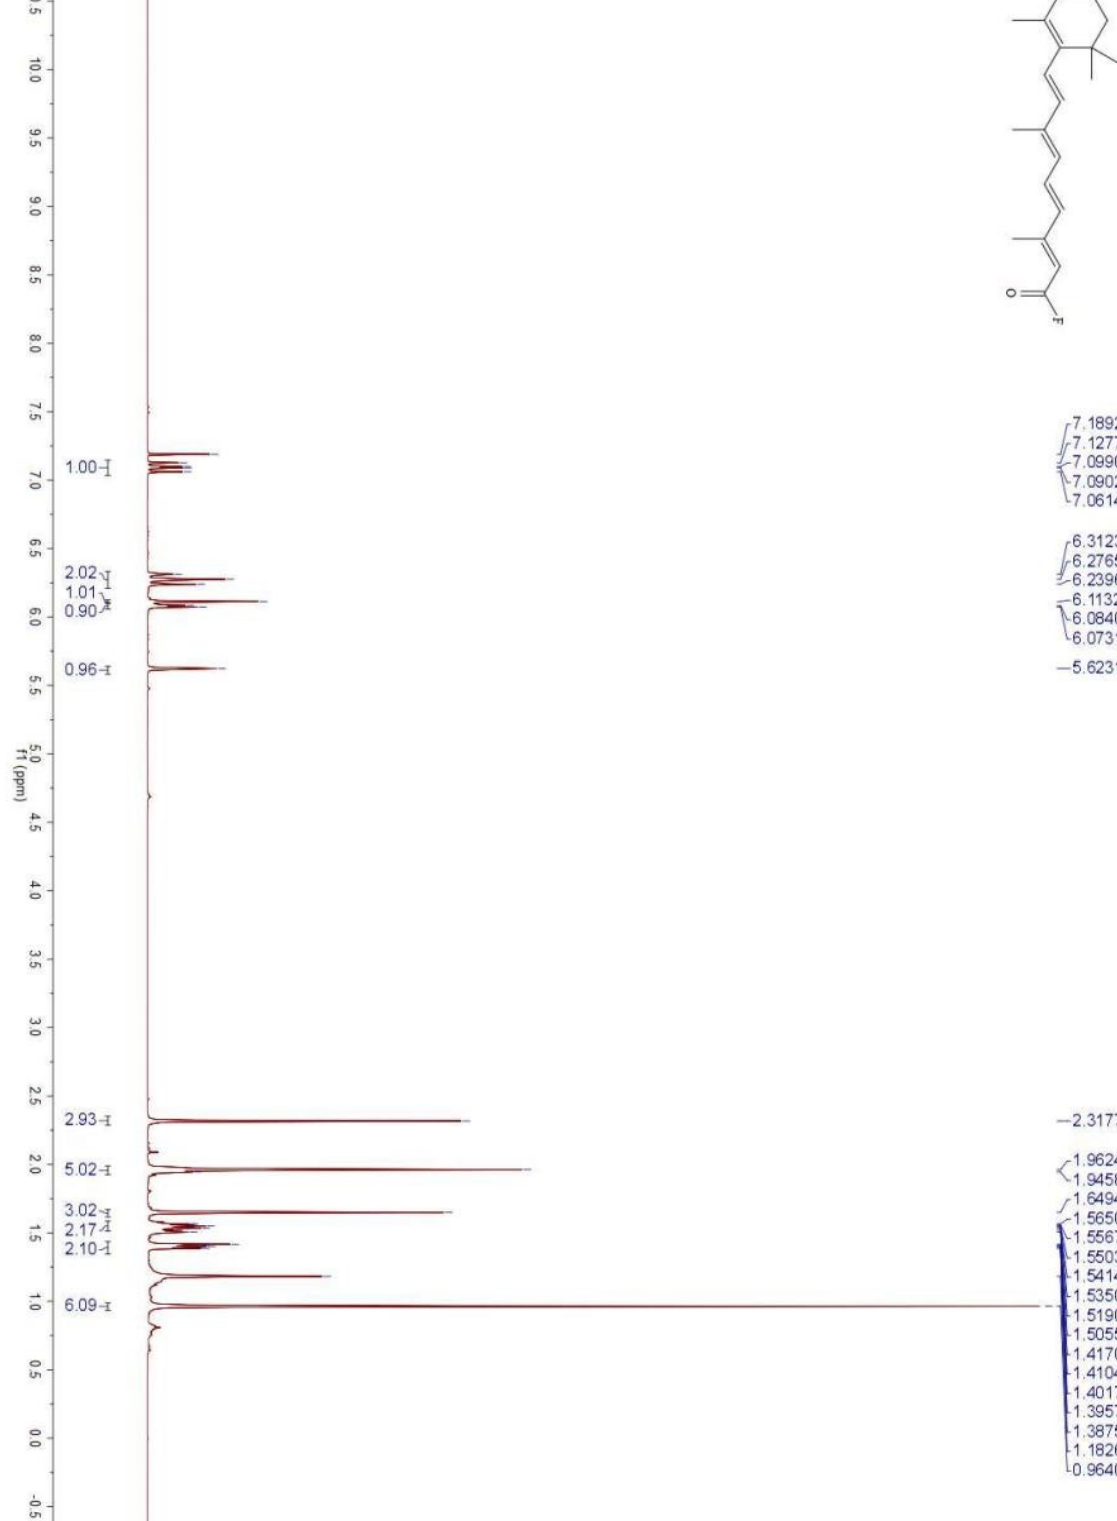

<sup>13</sup>C NMR (101 MHz, CDCl<sub>3</sub>) Spectrum of (2E,4E,6E,8E)-3,7-dimethyl-9-(2,6,6-trimethylcyclohex-1-en-1-yl)nona-2,4,6,8-tetraenoyl fluoride (**2v**)

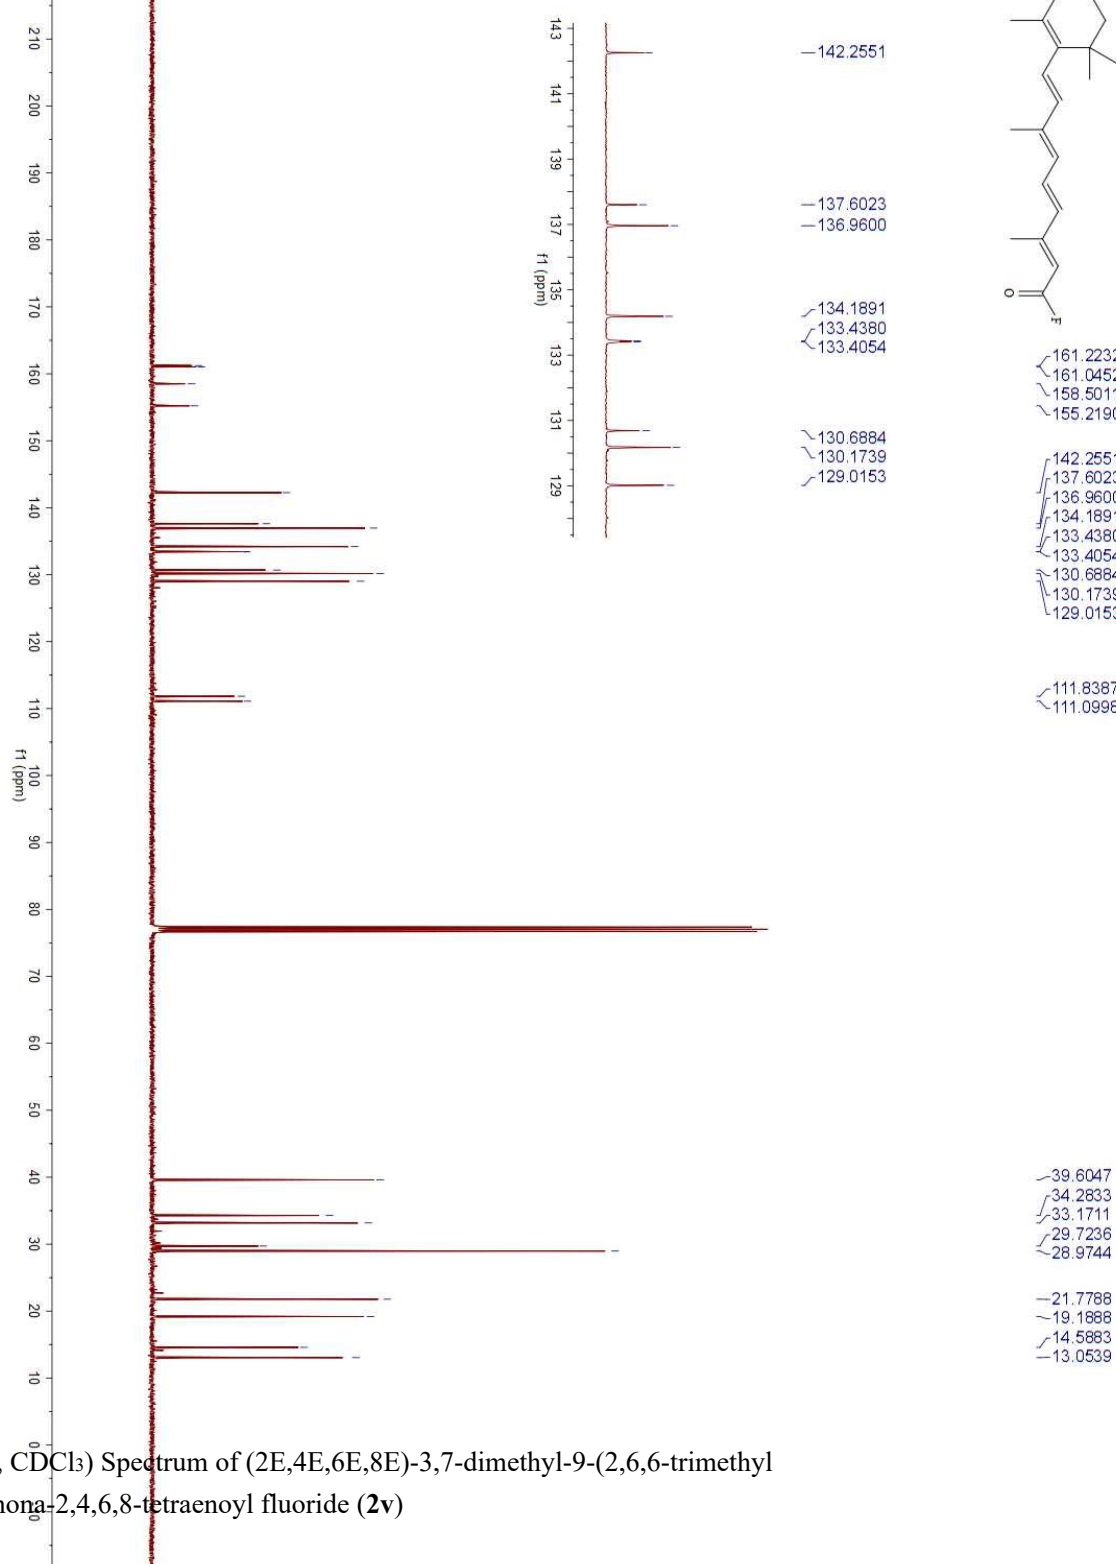

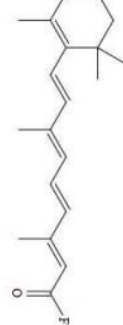

—42, 149

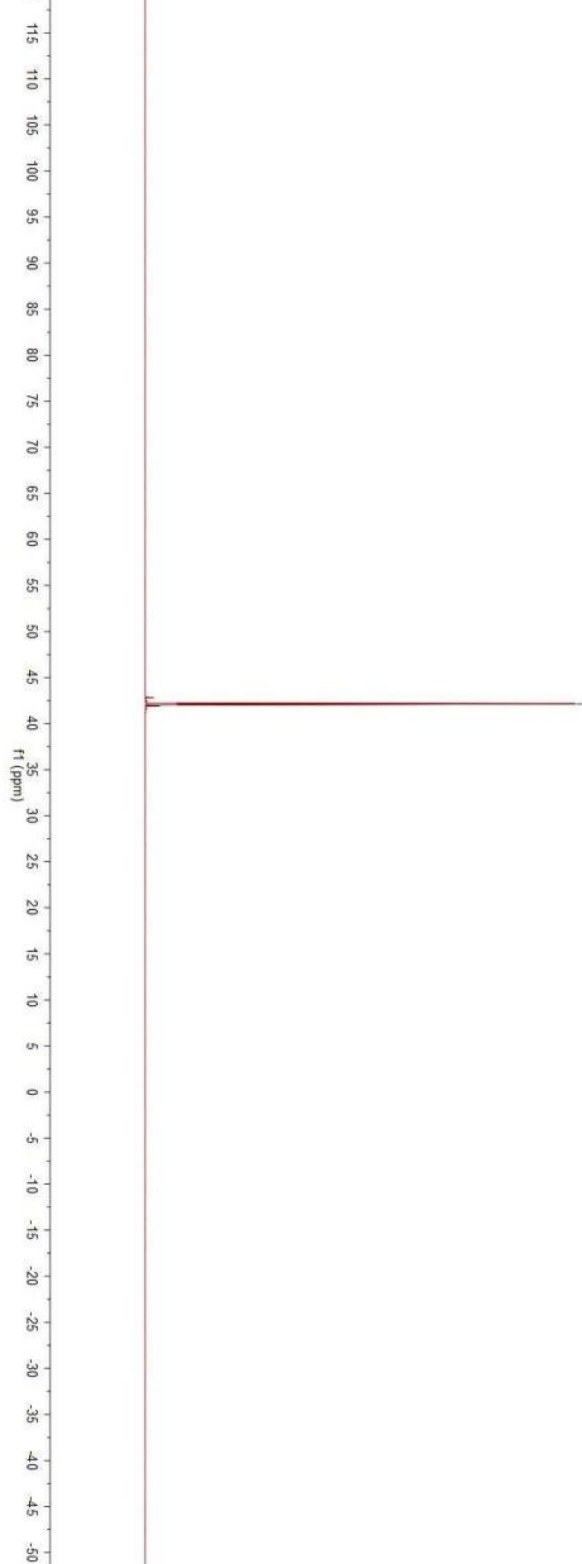

$^1\text{H}$  NMR (400 MHz,  $\text{CDCl}_3$ ) Spectrum of Benzo[*d*][1,3]dioxole-5-carbonyl fluoride (**2w**)

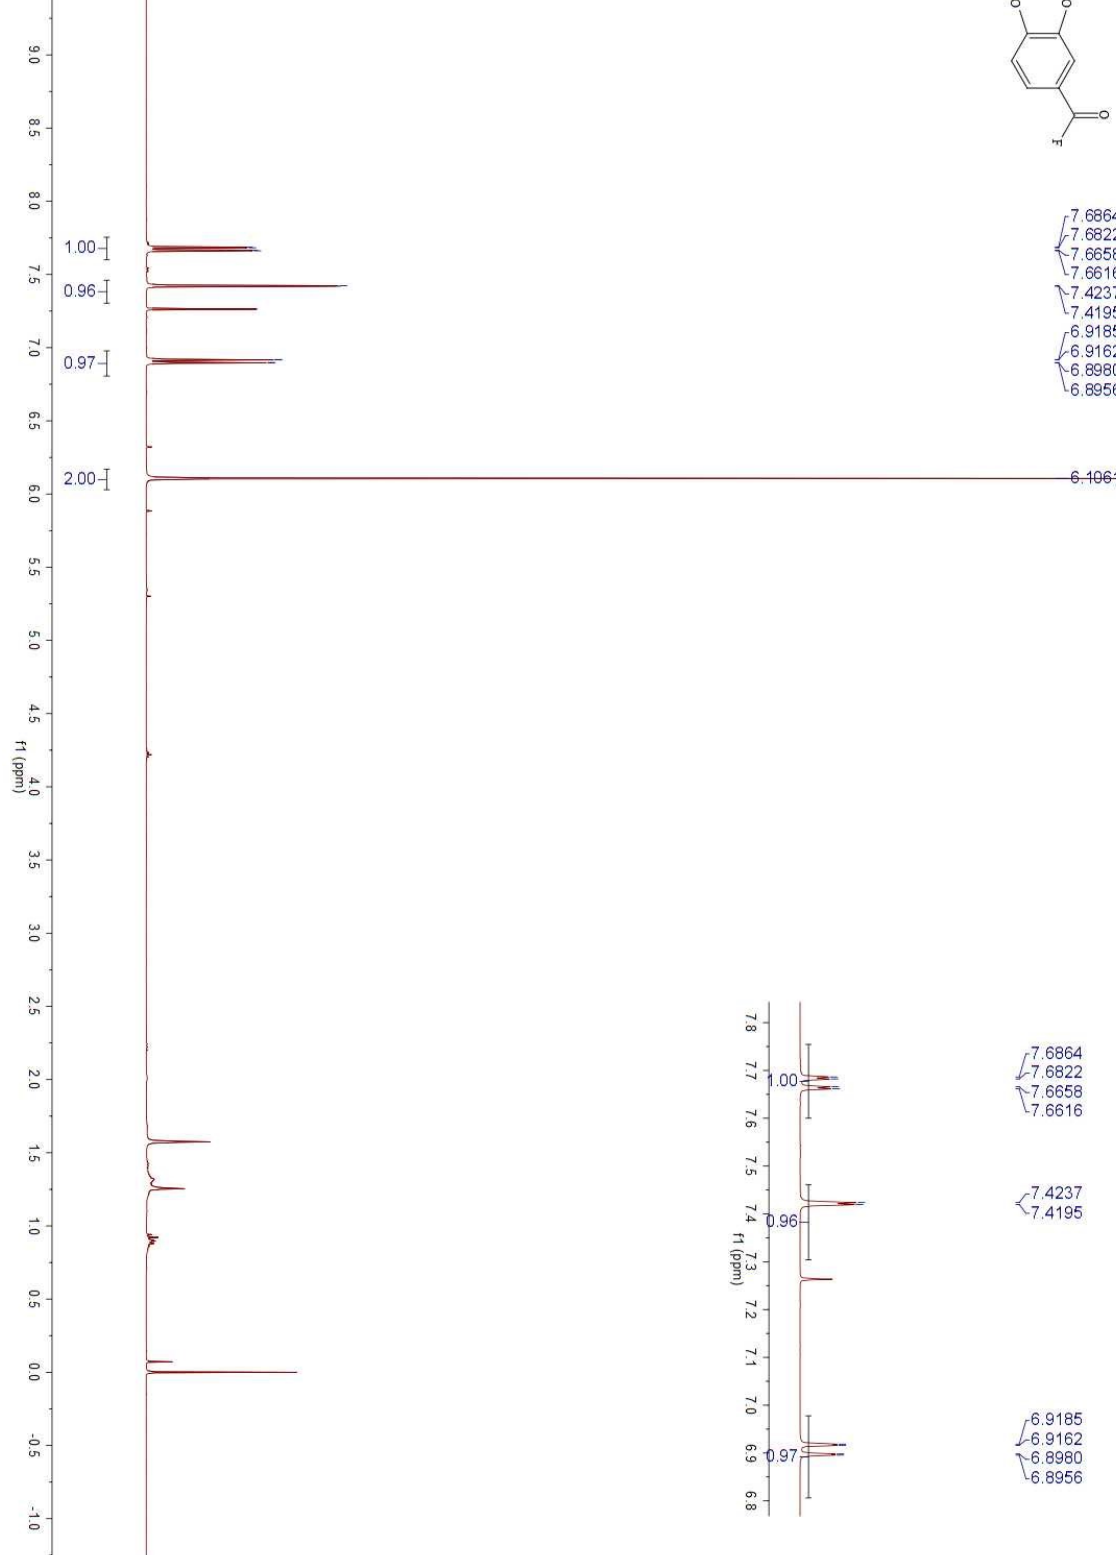

<sup>13</sup>C NMR (101 MHz, CDCl<sub>3</sub>) Spectrum of Benzo[d][1,3]dioxole-5-carbonyl fluoride (**2w**)

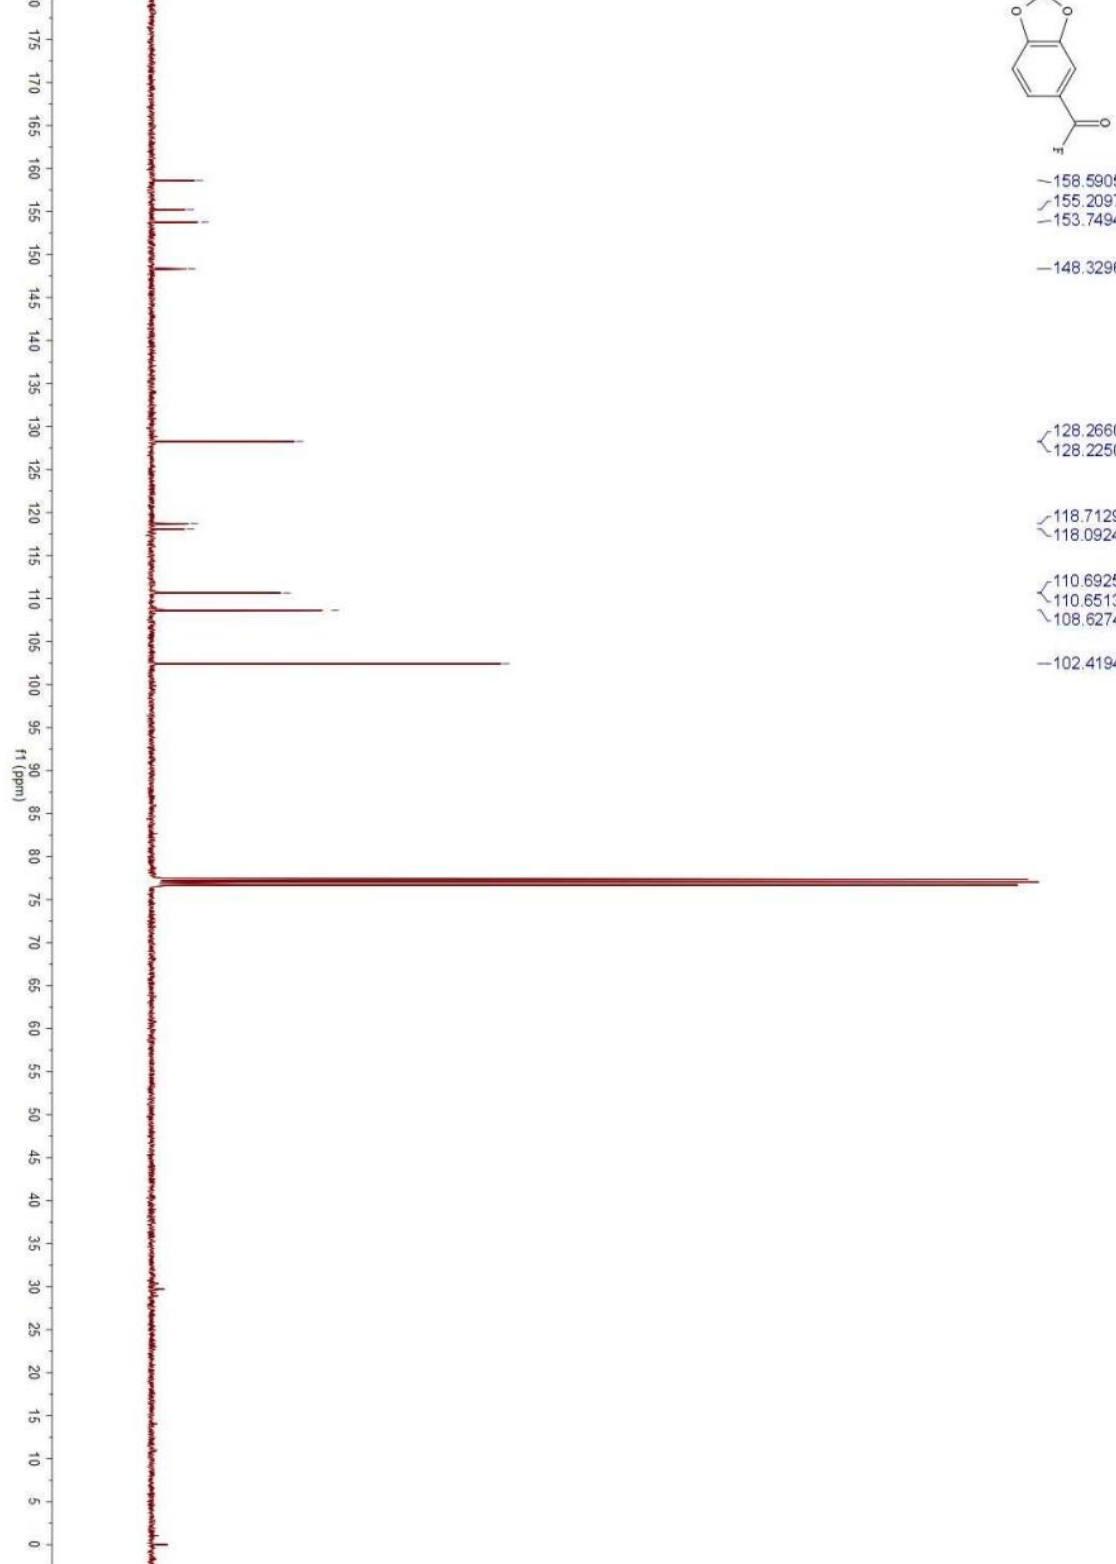

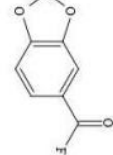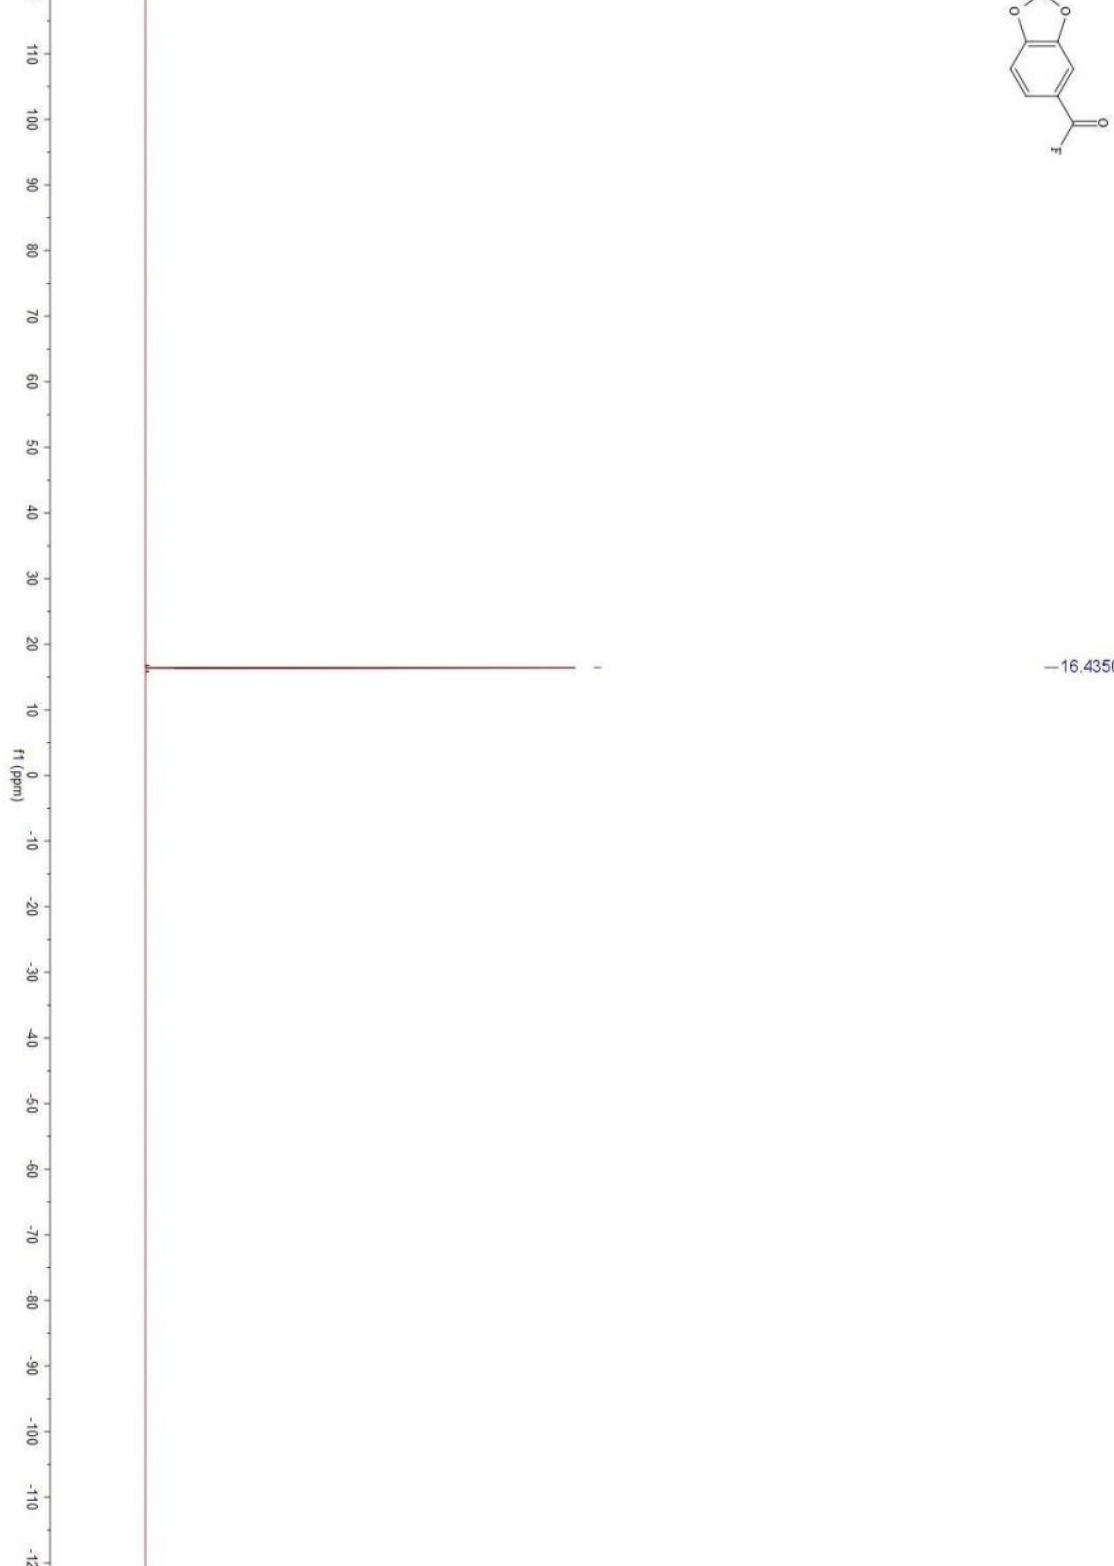

$^1\text{H}$  NMR (400 MHz,  $\text{CDCl}_3$ ) Spectrum of 2-(Naphthalen-2-yl)acetyl fluoride (**2x**)



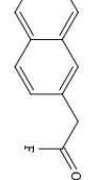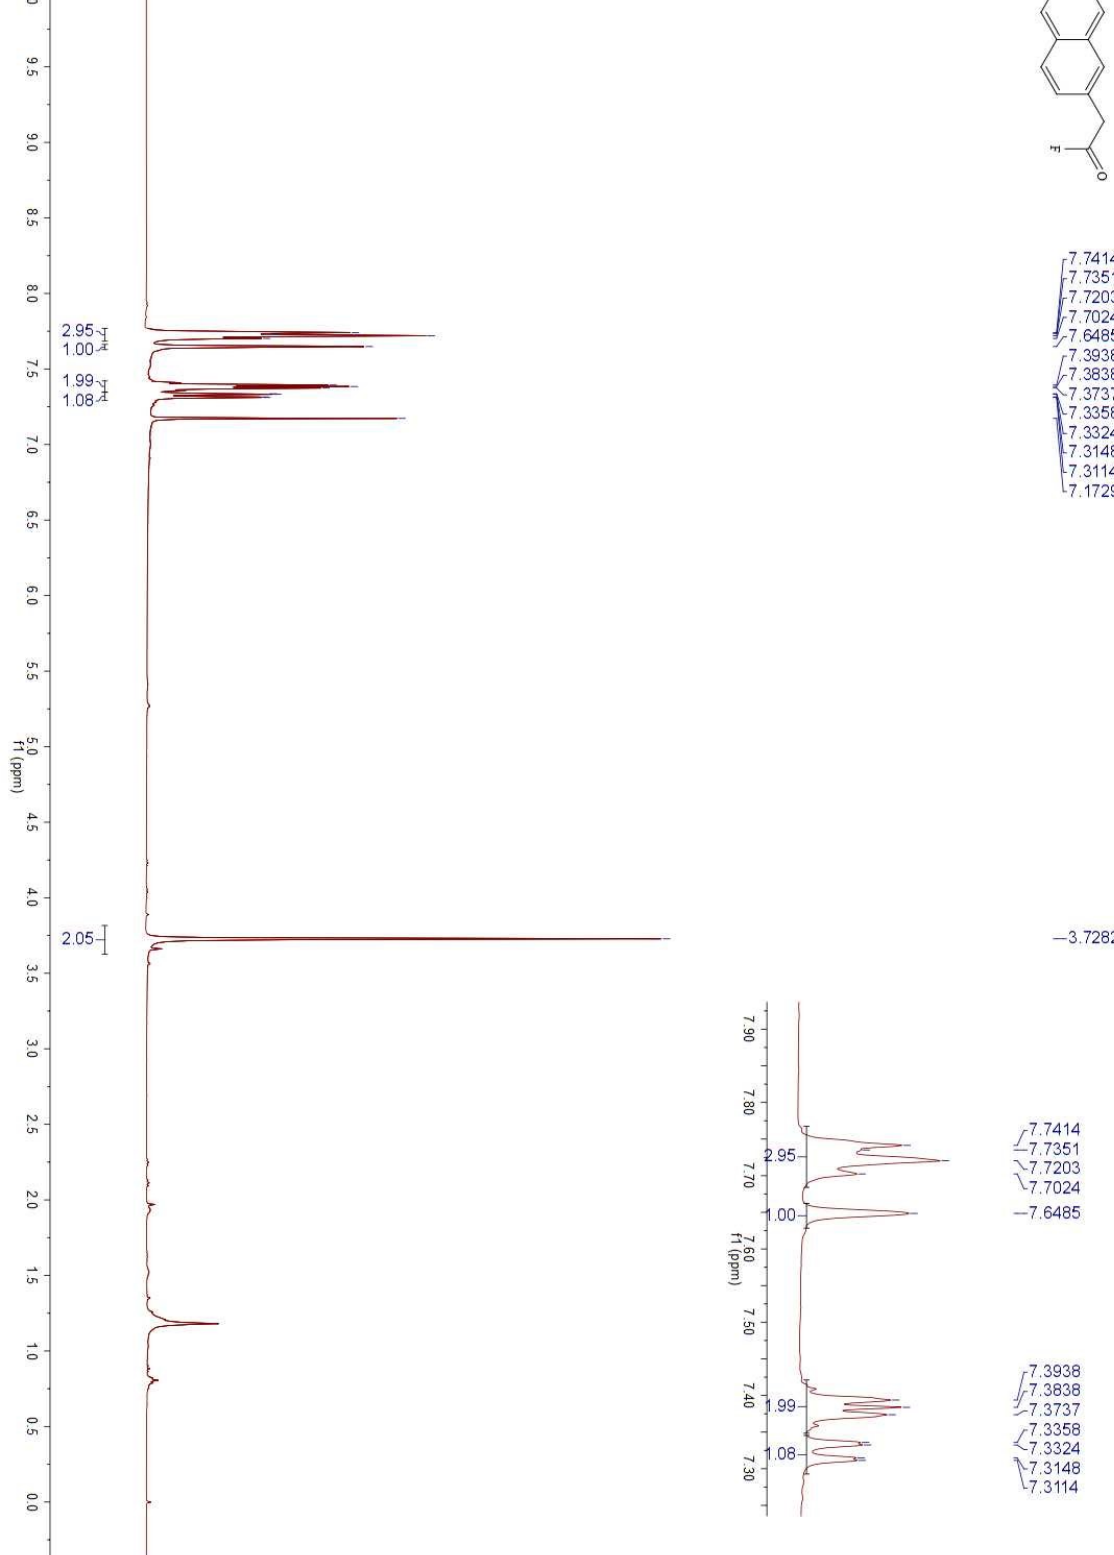

<sup>13</sup>C NMR (101 MHz, CDCl<sub>3</sub>) Spectrum of 2-(Naphthalen-2-yl)acetyl fluoride (**2x**)

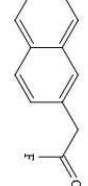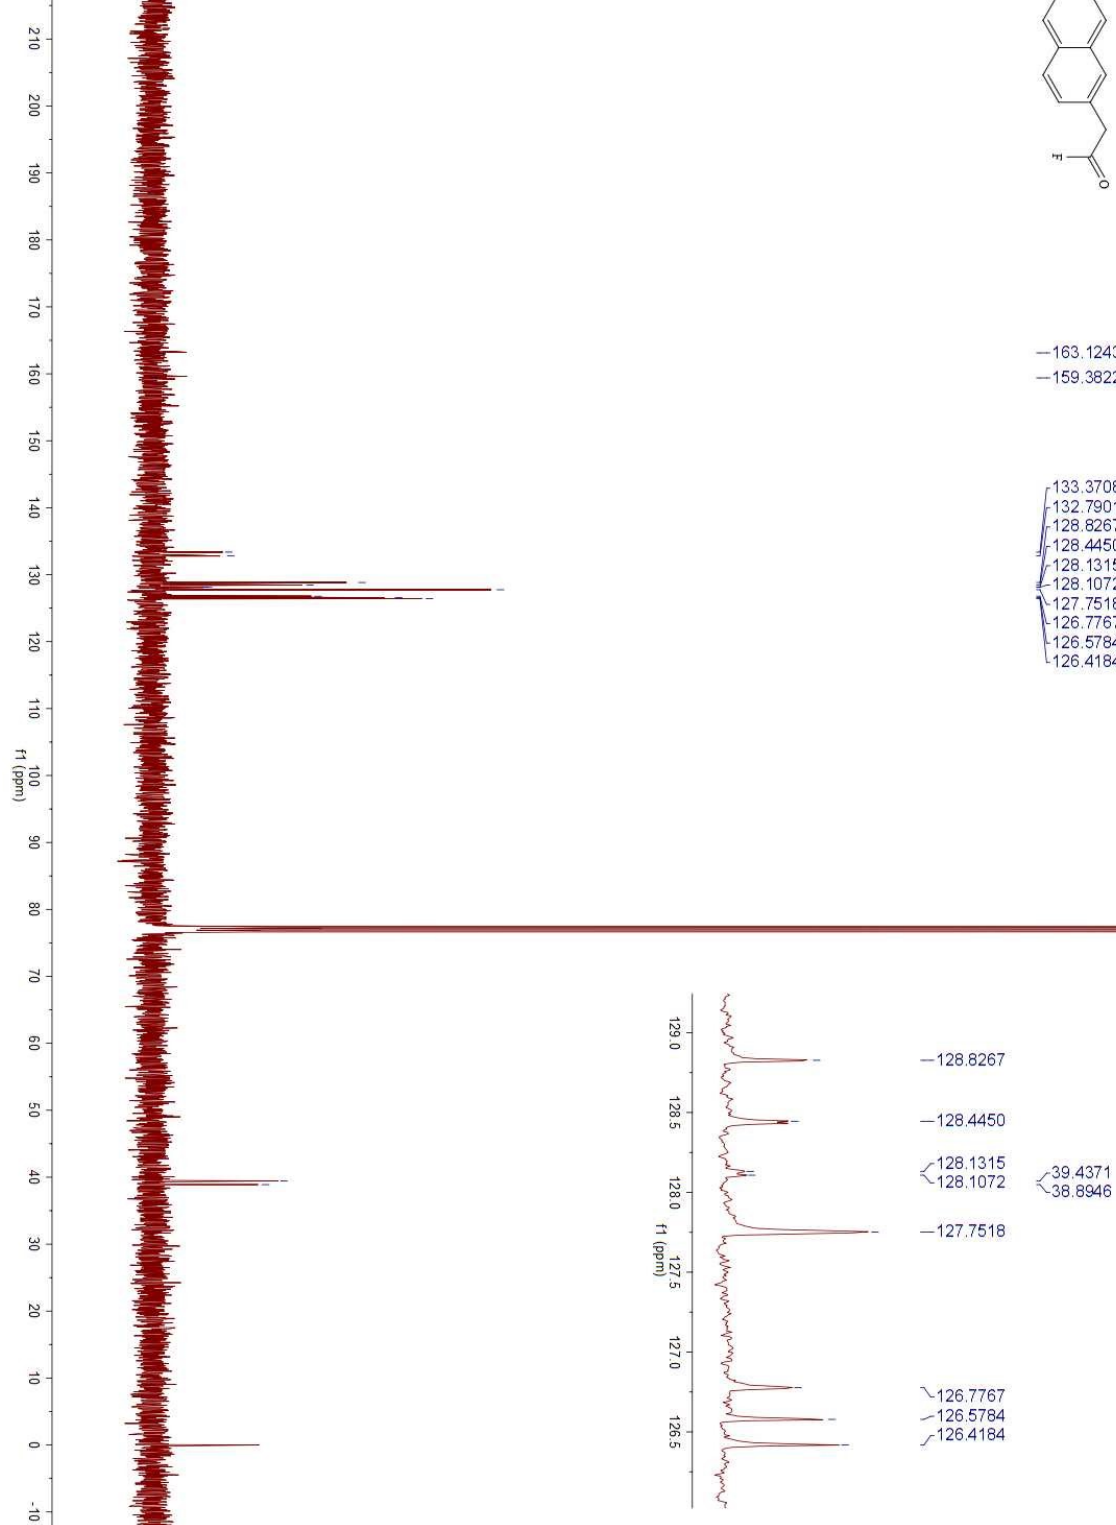

$^{19}\text{F}$  NMR (376 MHz,  $\text{CDCl}_3$ ) Spectrum of 2-(Naphthalen-2-yl)acetyl fluoride (**2x**)

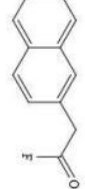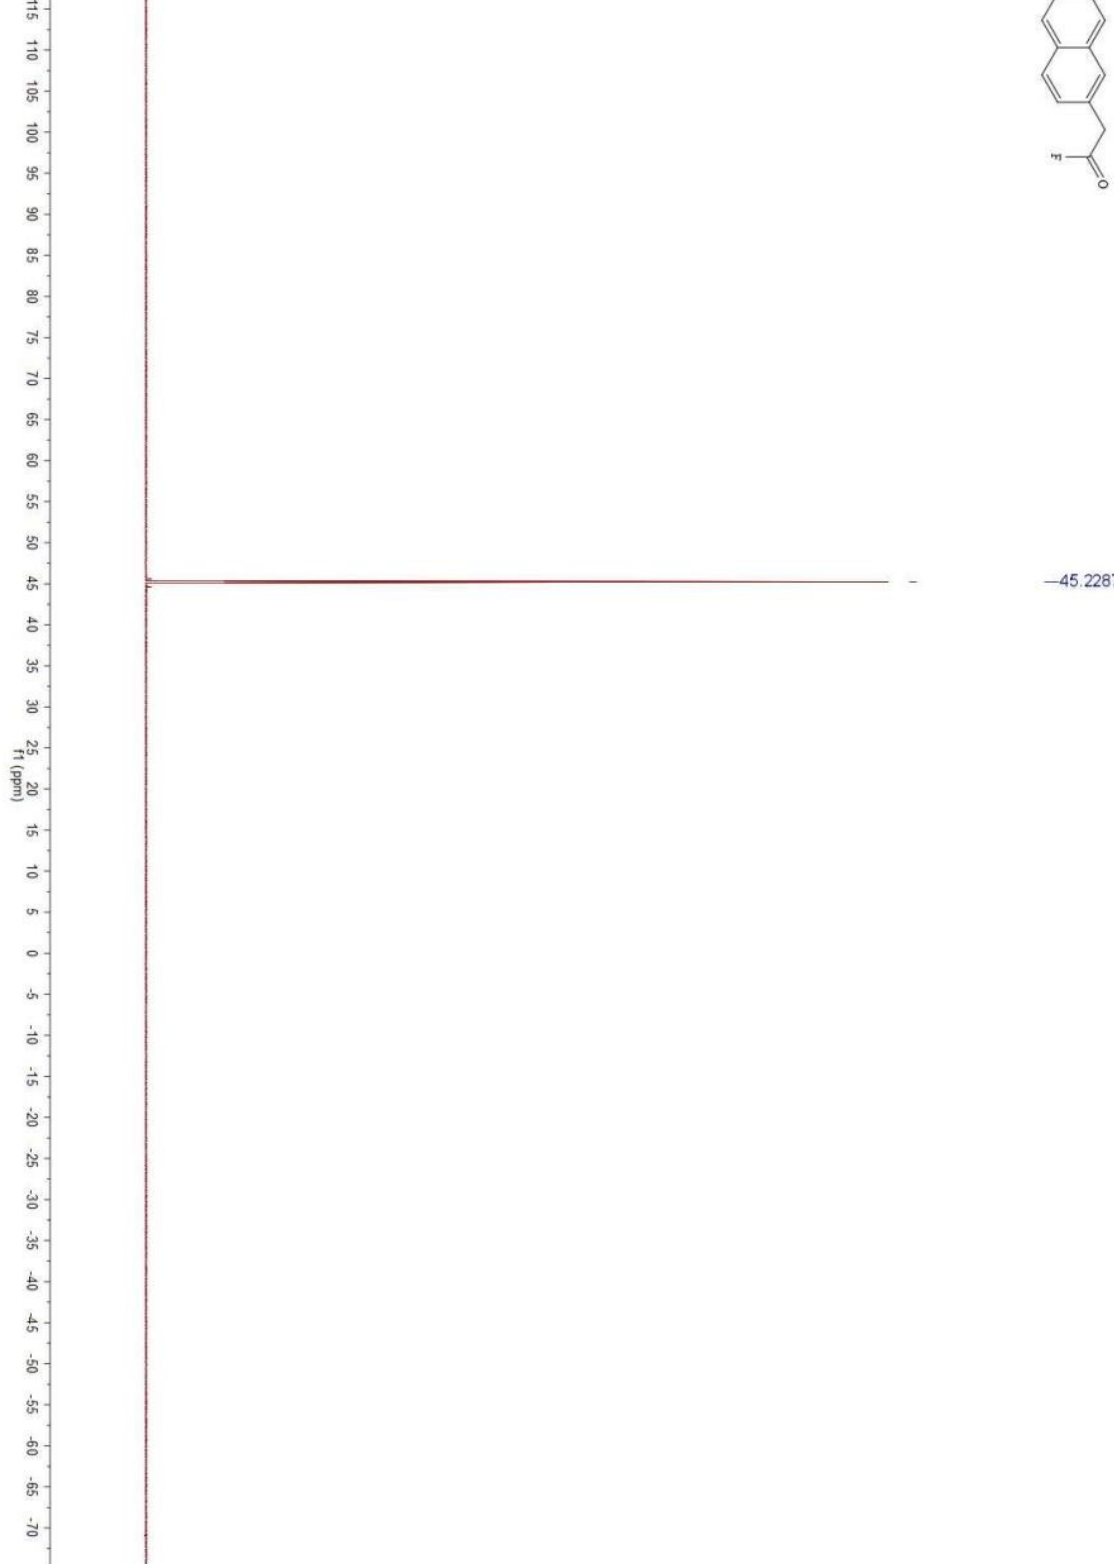

$^1\text{H}$  NMR (400 MHz,  $\text{CDCl}_3$ ) Spectrum of morpholino(naphthalen-2-yl)methanone (**3**)

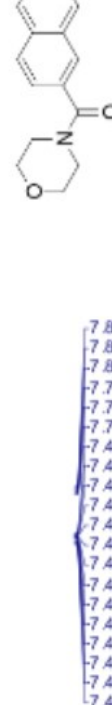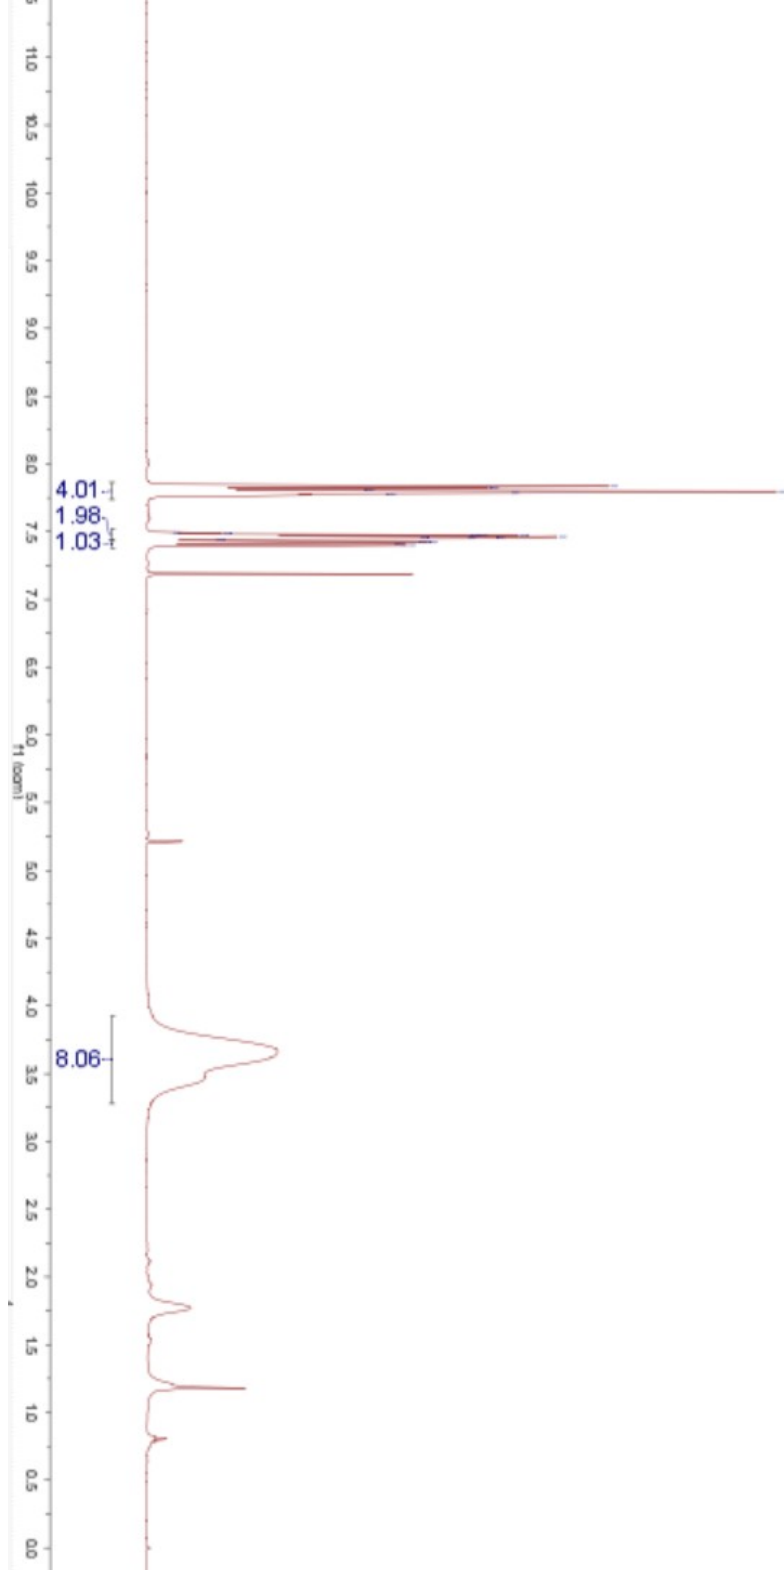

$^{13}\text{C}$  NMR (101 MHz,  $\text{CDCl}_3$ ) Spectrum of morpholino(naphthalen-2-yl)methanone (**3**)

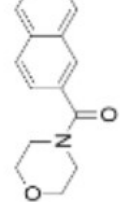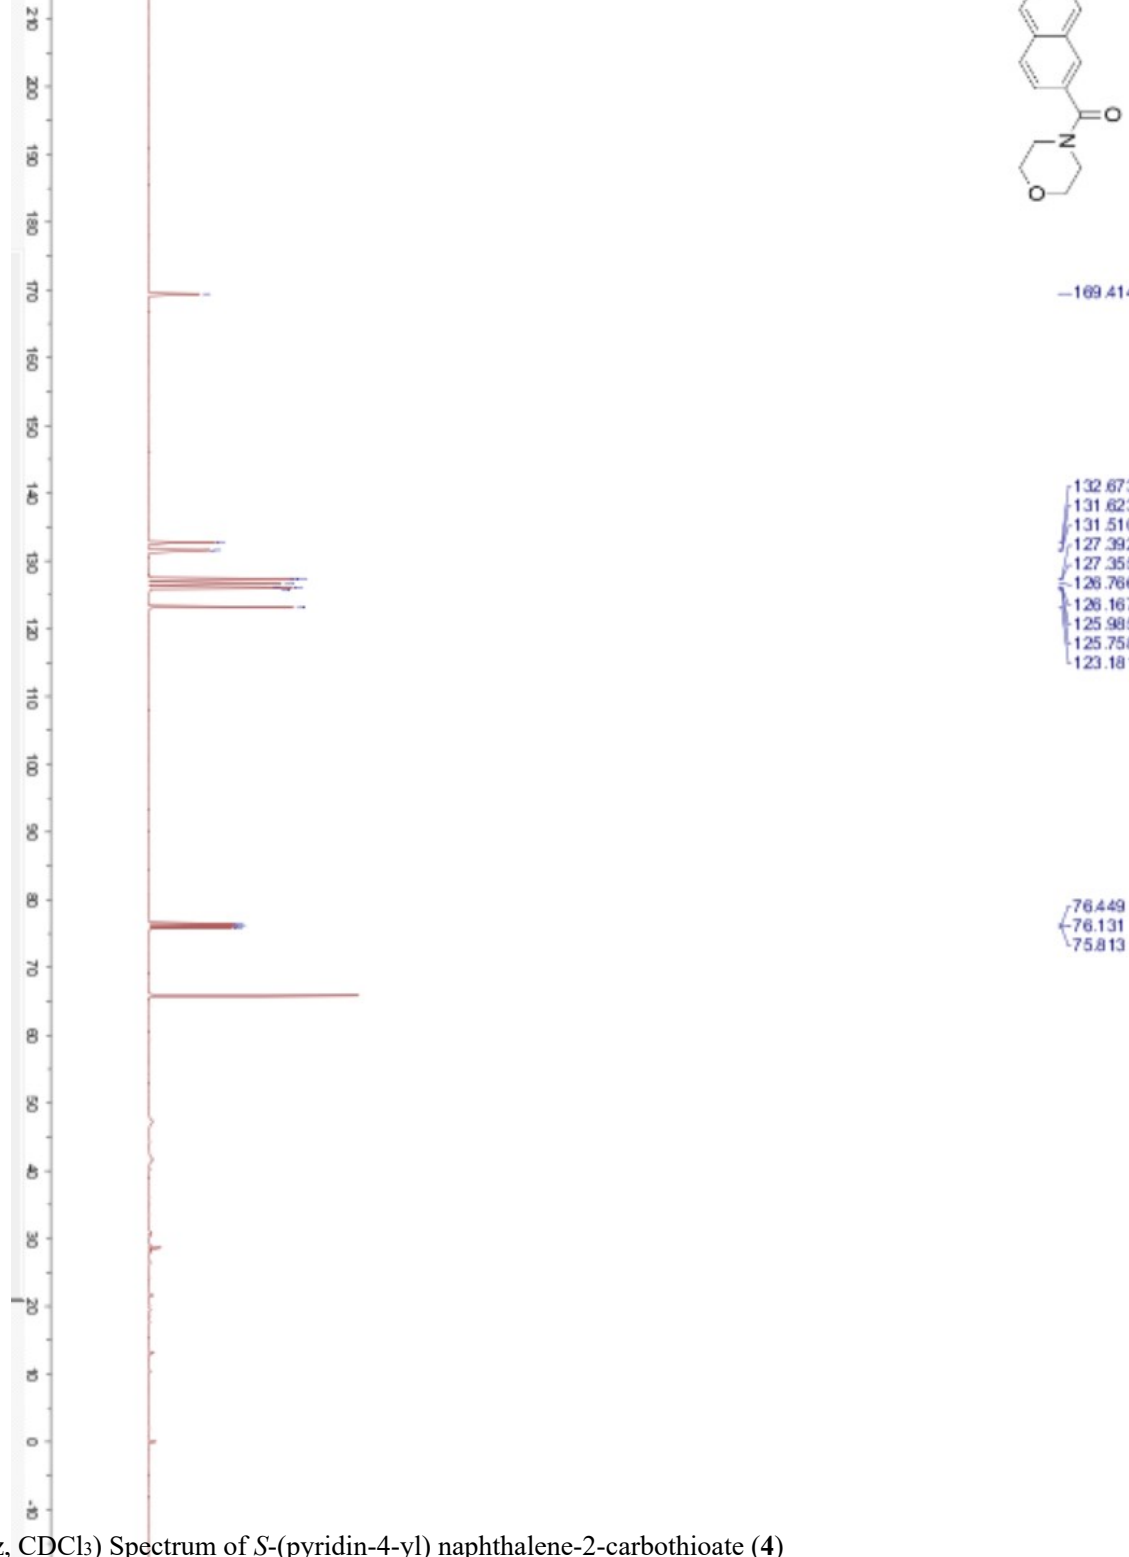

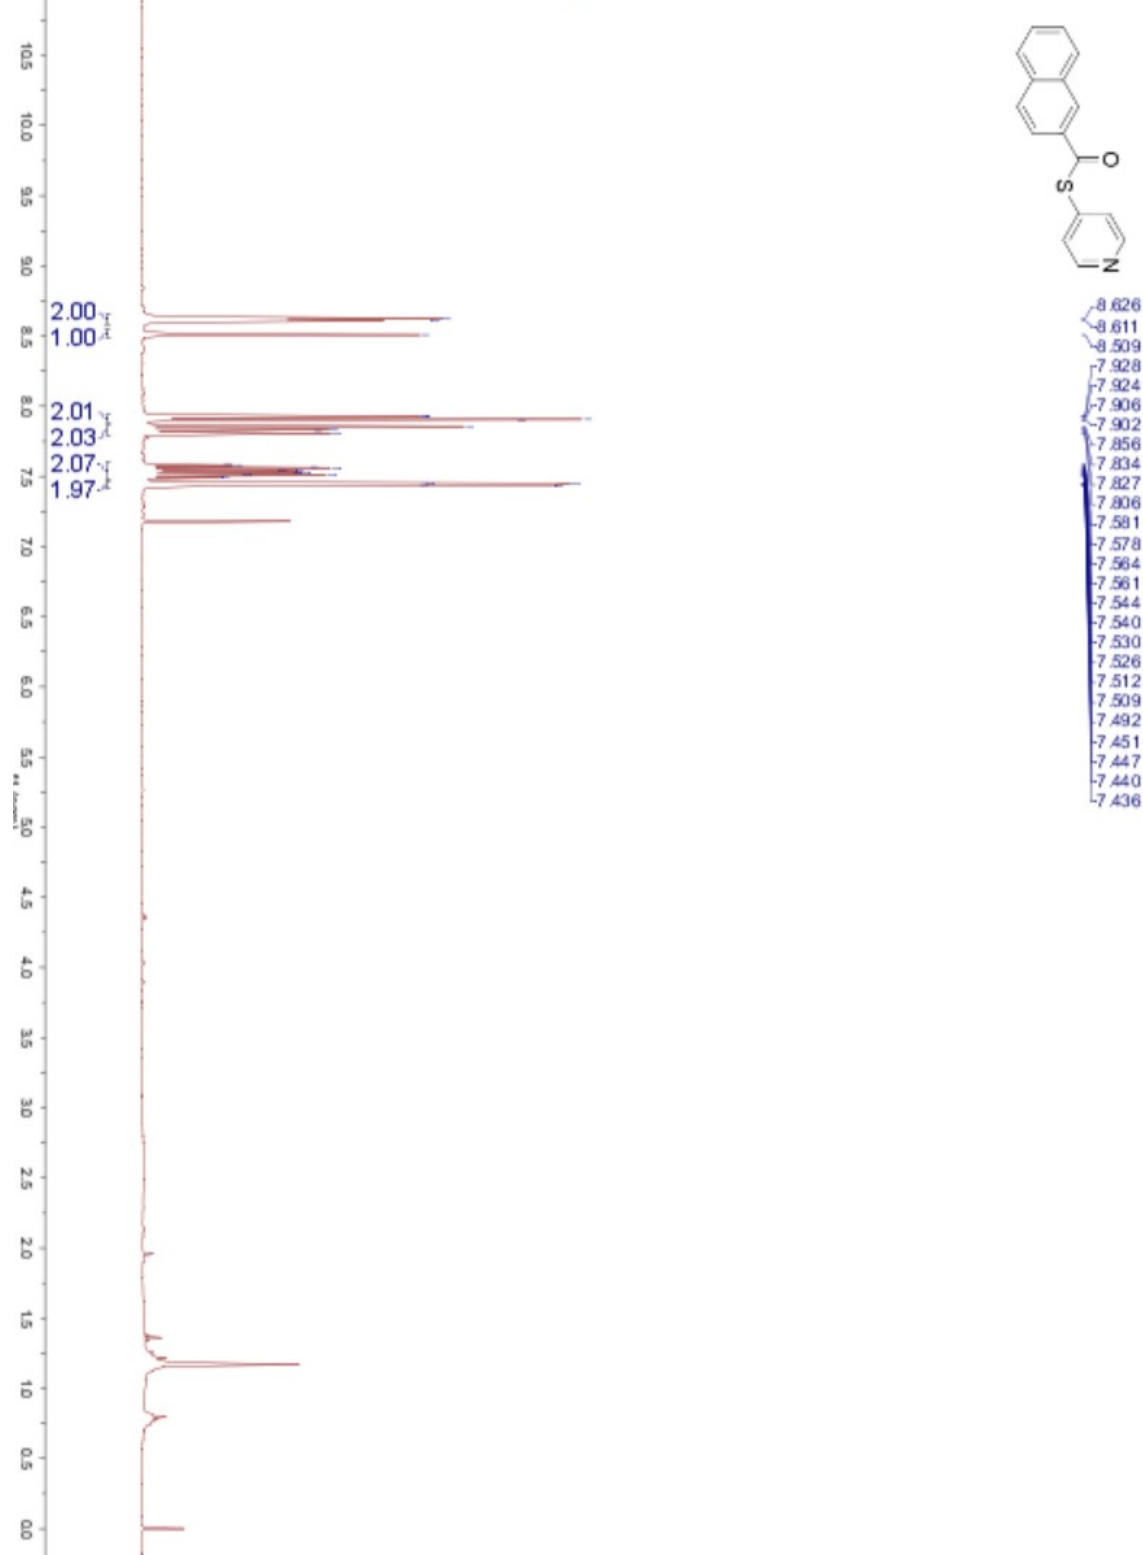

<sup>13</sup>C NMR (101 MHz, CDCl<sub>3</sub>) Spectrum of *S*-(pyridin-4-yl) naphthalene-2-carbothioate (**4**)

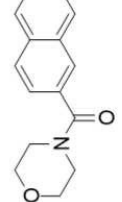

— 169.41

132.673  
131.623  
131.510  
127.392  
127.355  
126.766  
126.167  
125.985  
125.758  
123.181

76.449  
76.131  
75.813

— 132.673

131.623  
131.510

127.392  
127.355  
126.766  
126.167  
125.985  
125.758

— 123.181

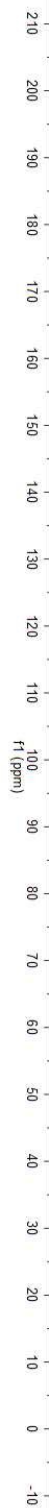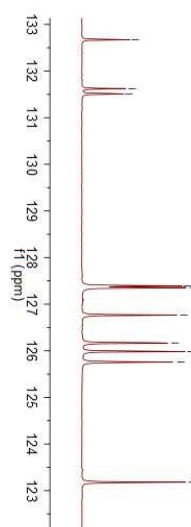

$^1\text{H}$  NMR (400 MHz,  $\text{CDCl}_3$ ) Spectrum of naphthalen-2-yl(perfluorophenyl)methanone (**5**)

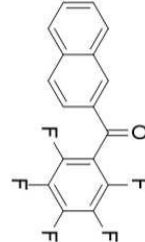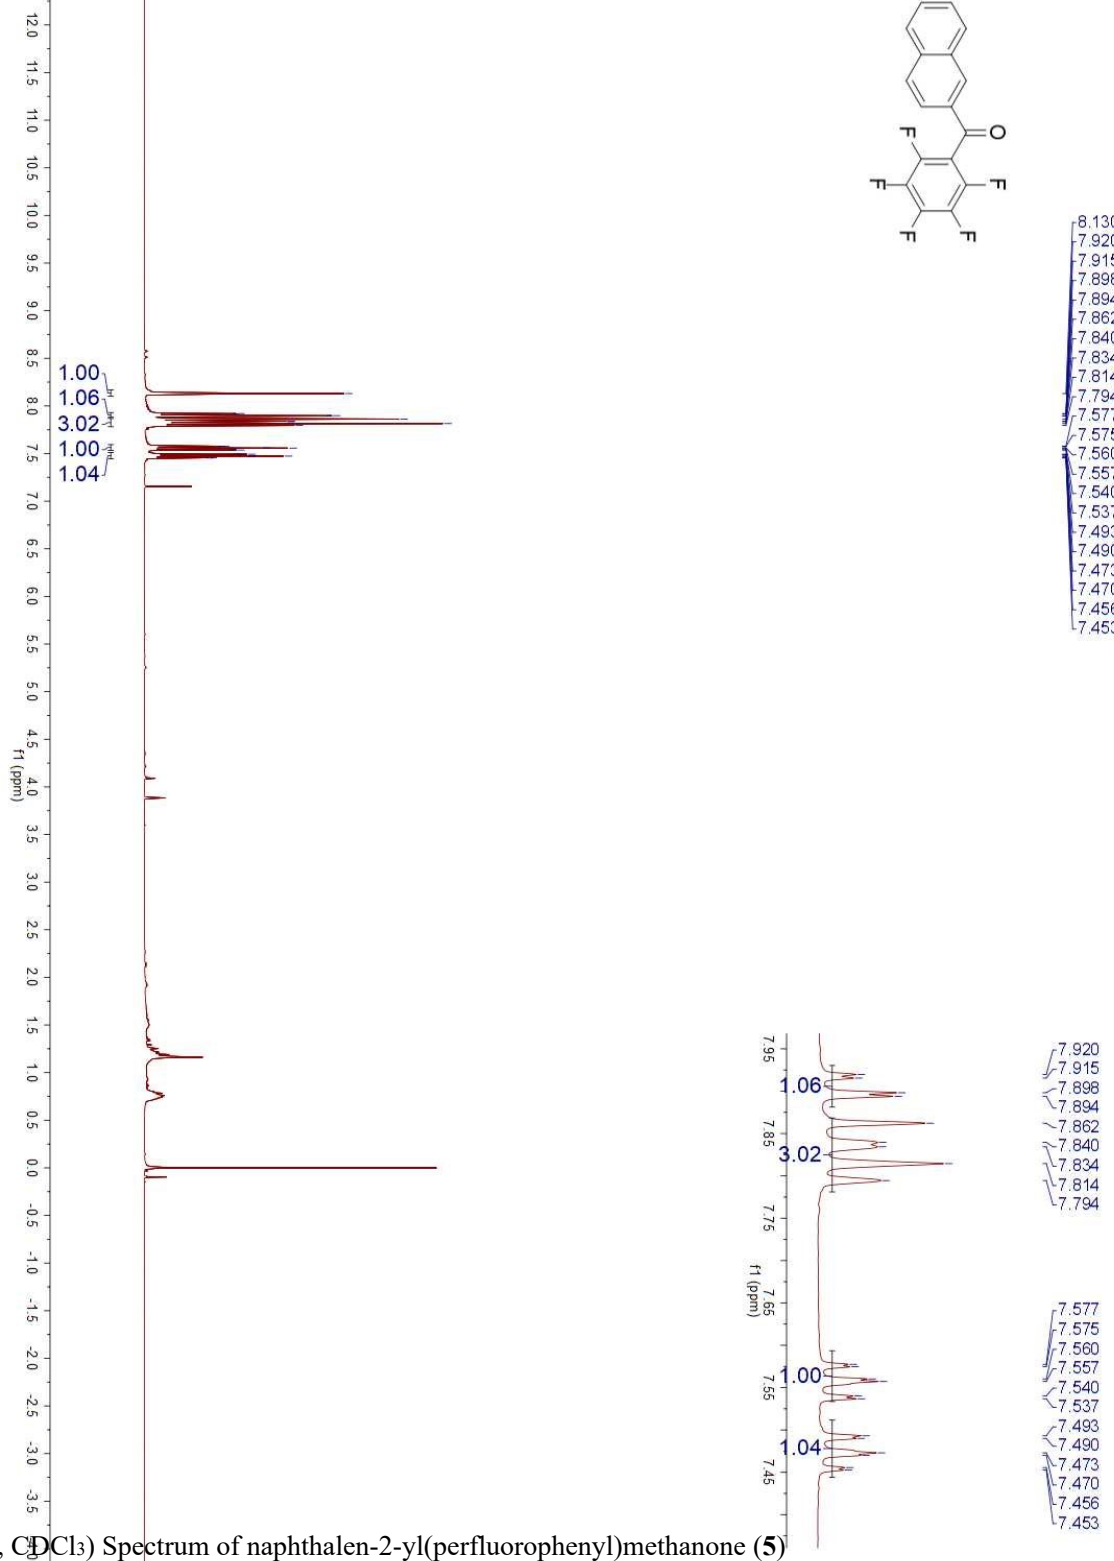



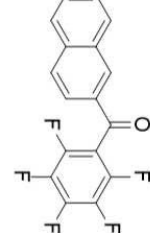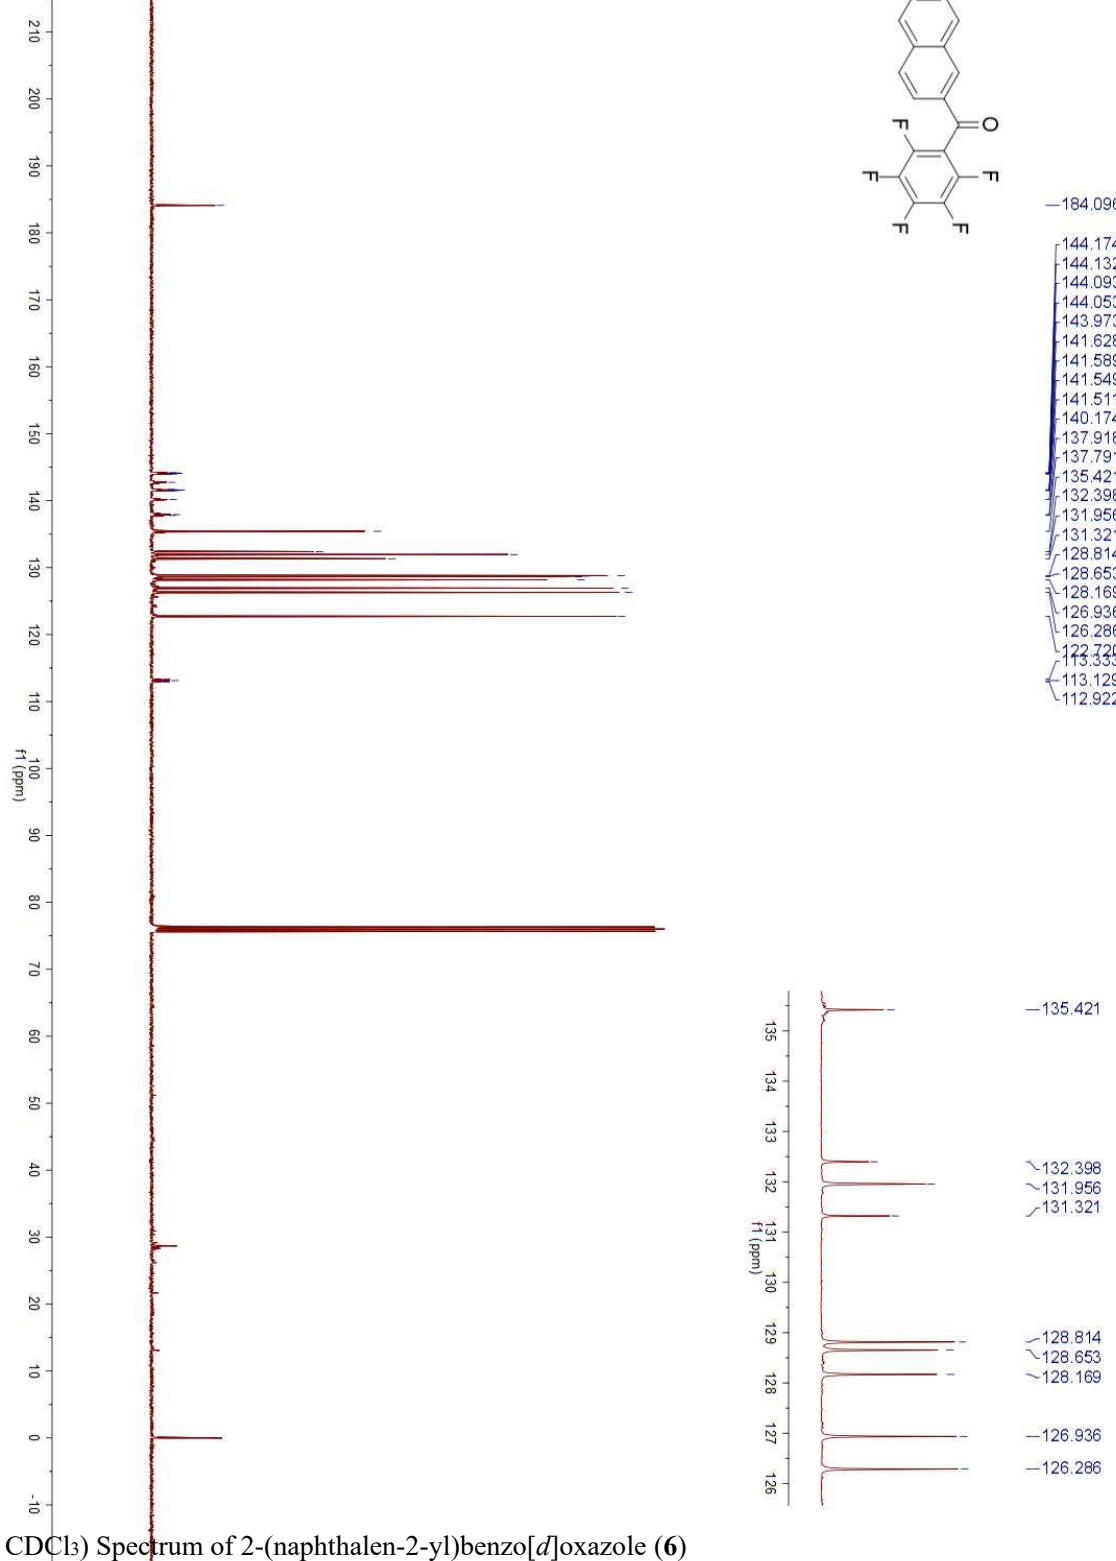

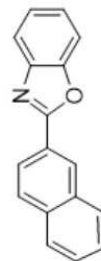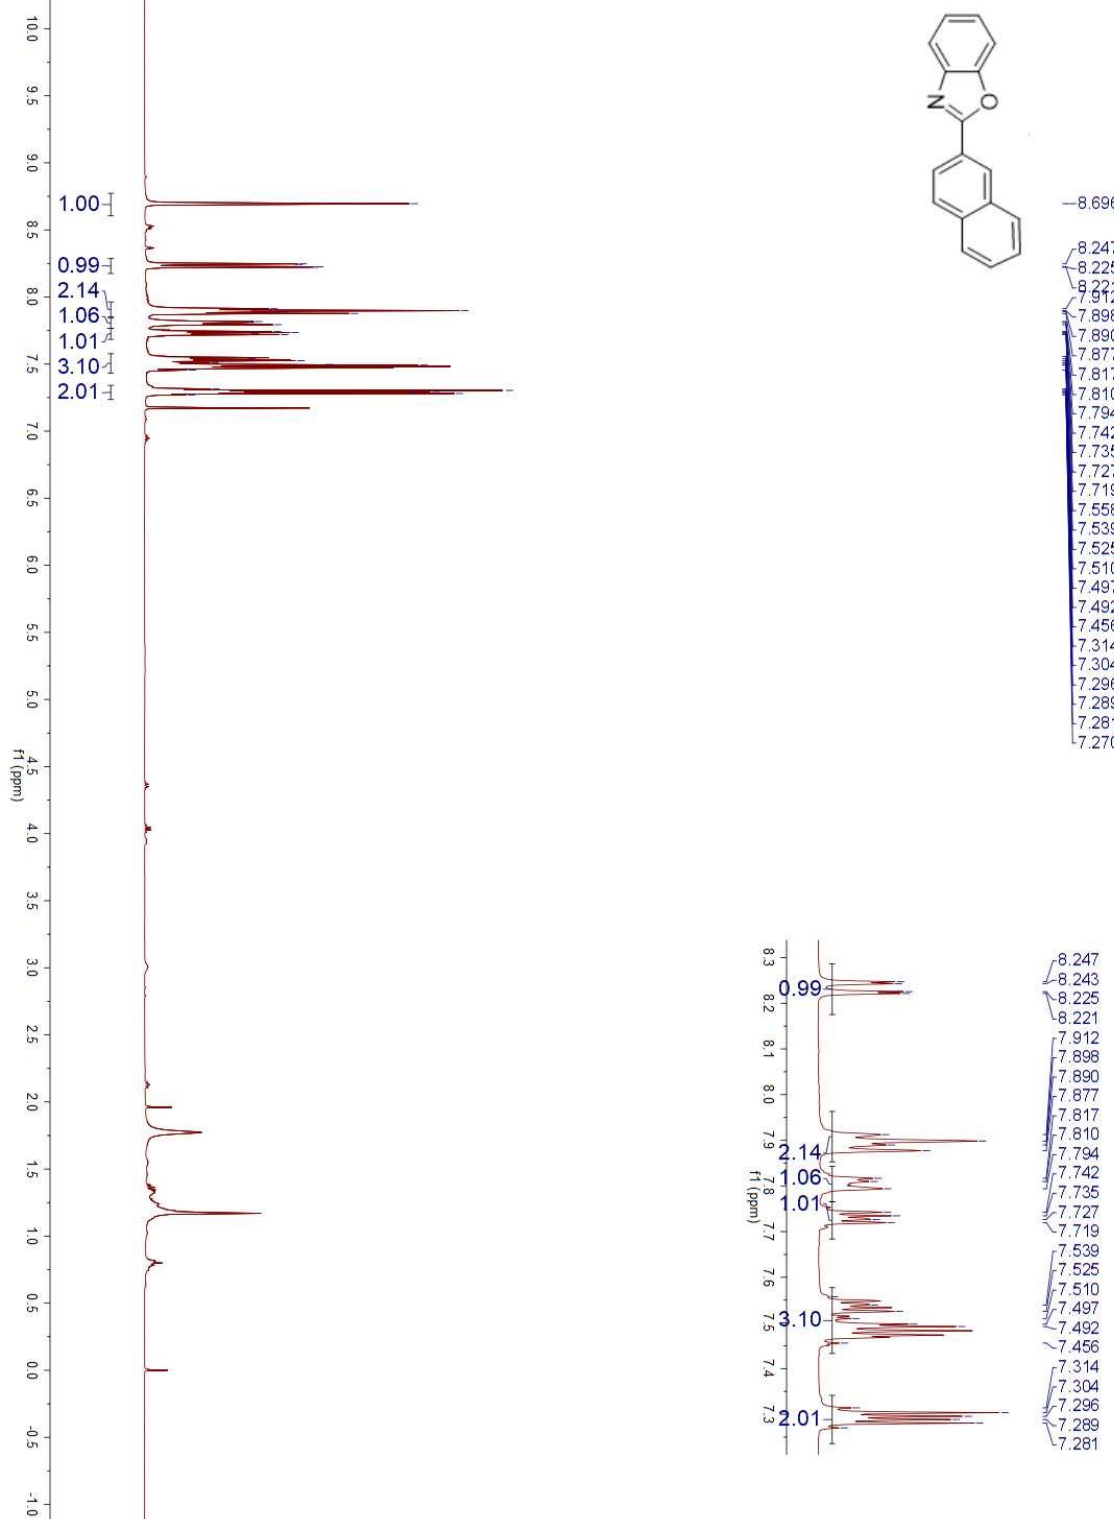

<sup>13</sup>C NMR (101 MHz, CDCl<sub>3</sub>) Spectrum of 2-(naphthalen-2-yl)benzo[d]oxazole (6)

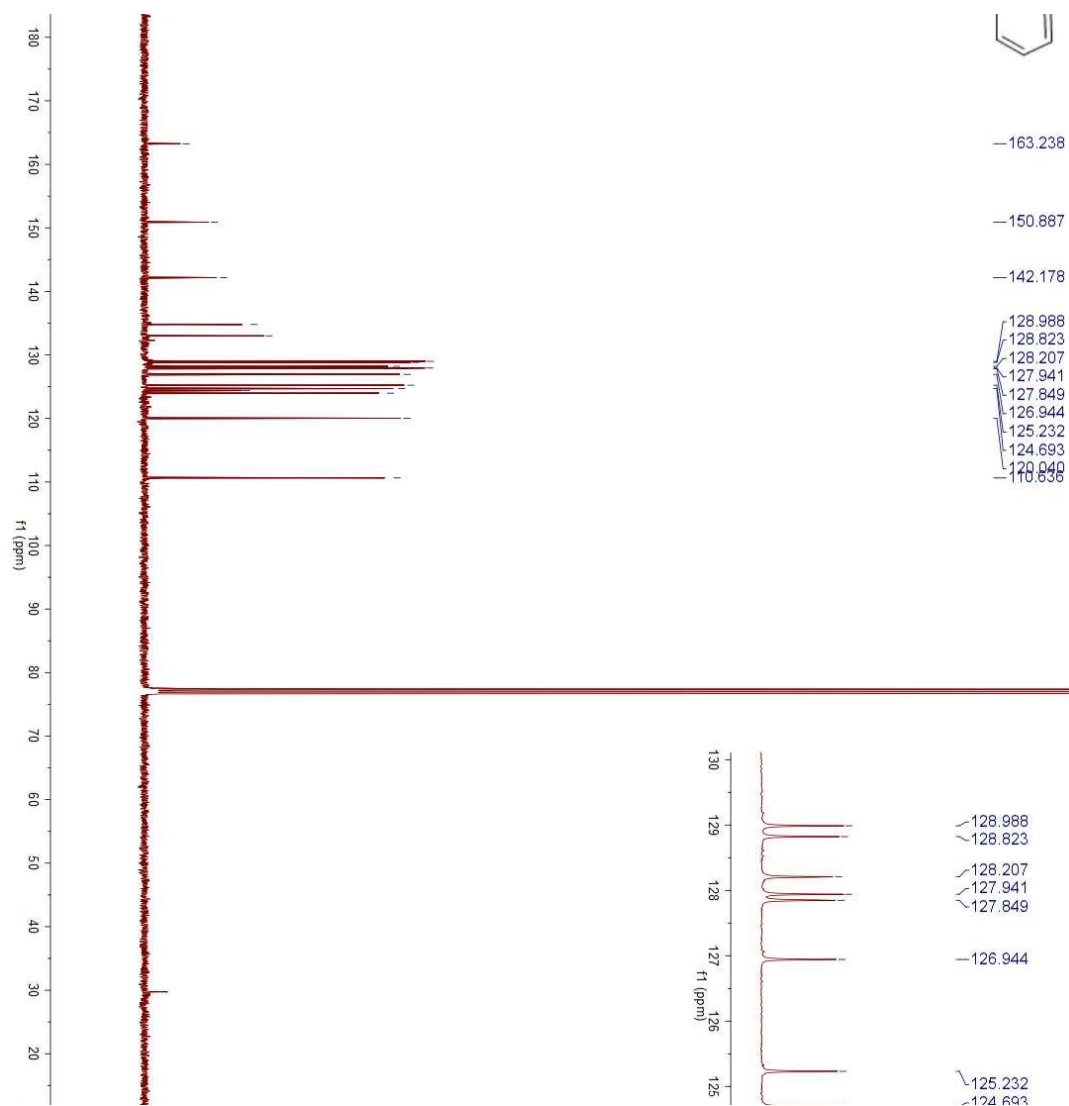

<sup>1</sup>H NMR (400 MHz, CDCl<sub>3</sub>) Spectrum of triisopropyl(naphthalen-2-ylethynyl)silane (7)

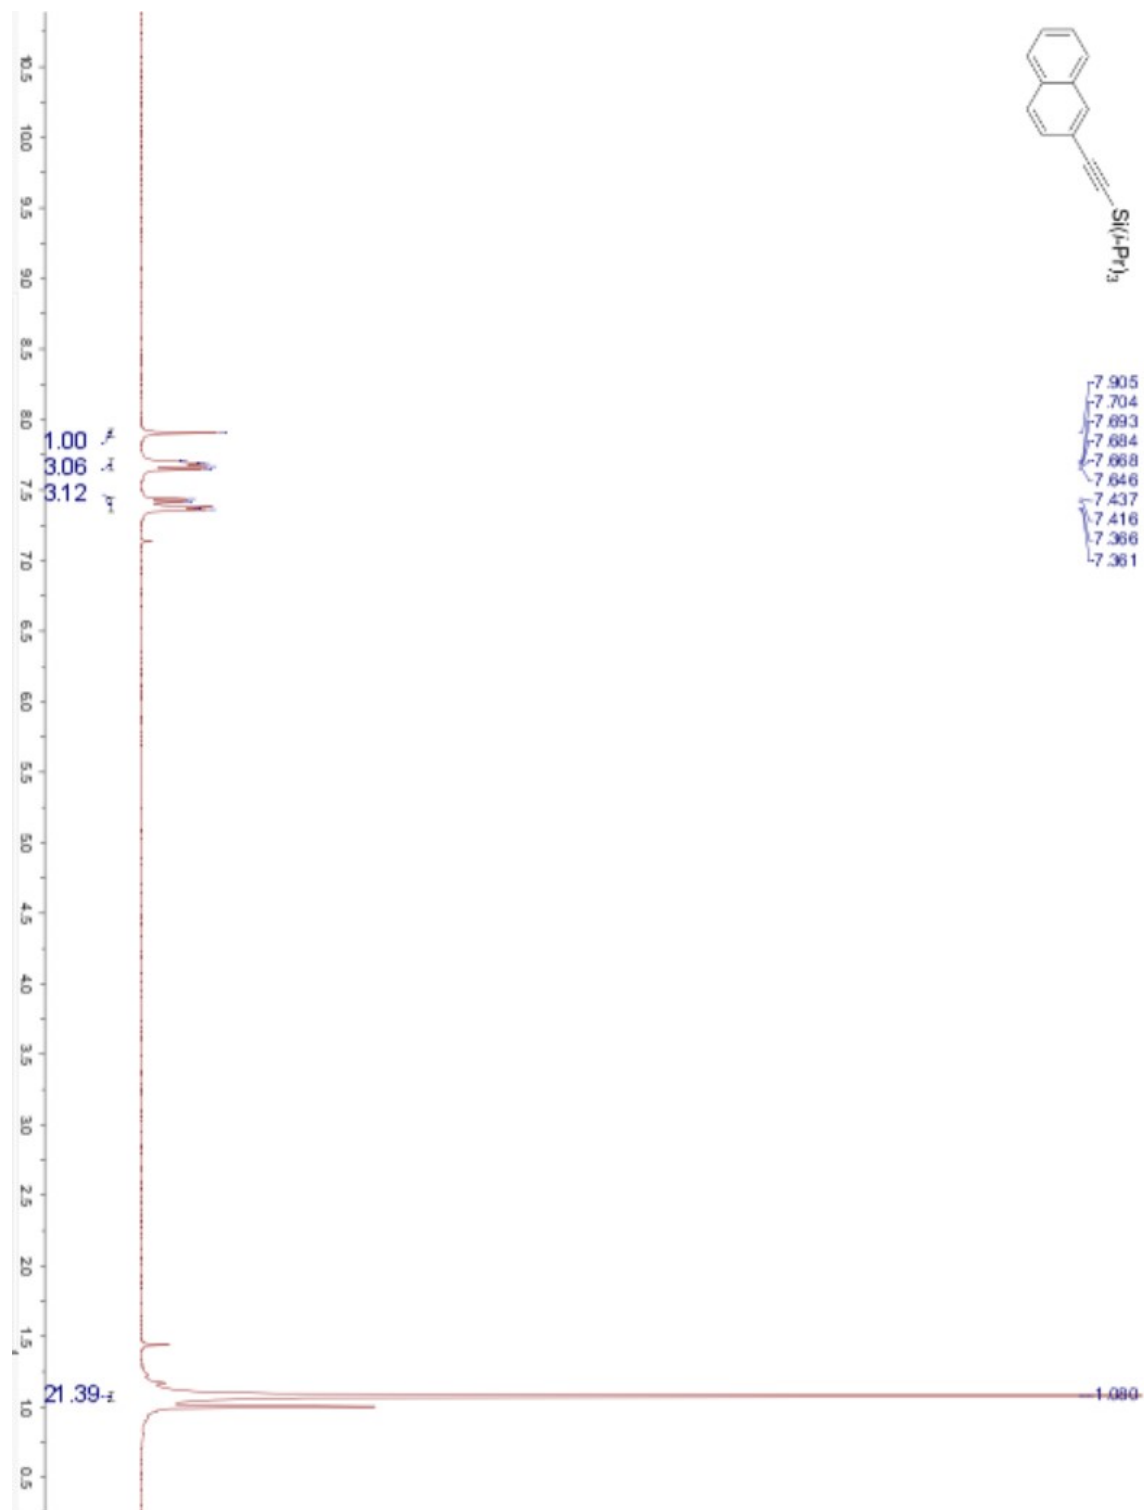

<sup>13</sup>C NMR (101 MHz, CDCl<sub>3</sub>) Spectrum of triisopropyl(naphthalen-2-ylethynyl)silane (7)

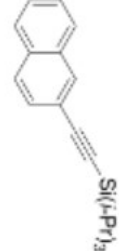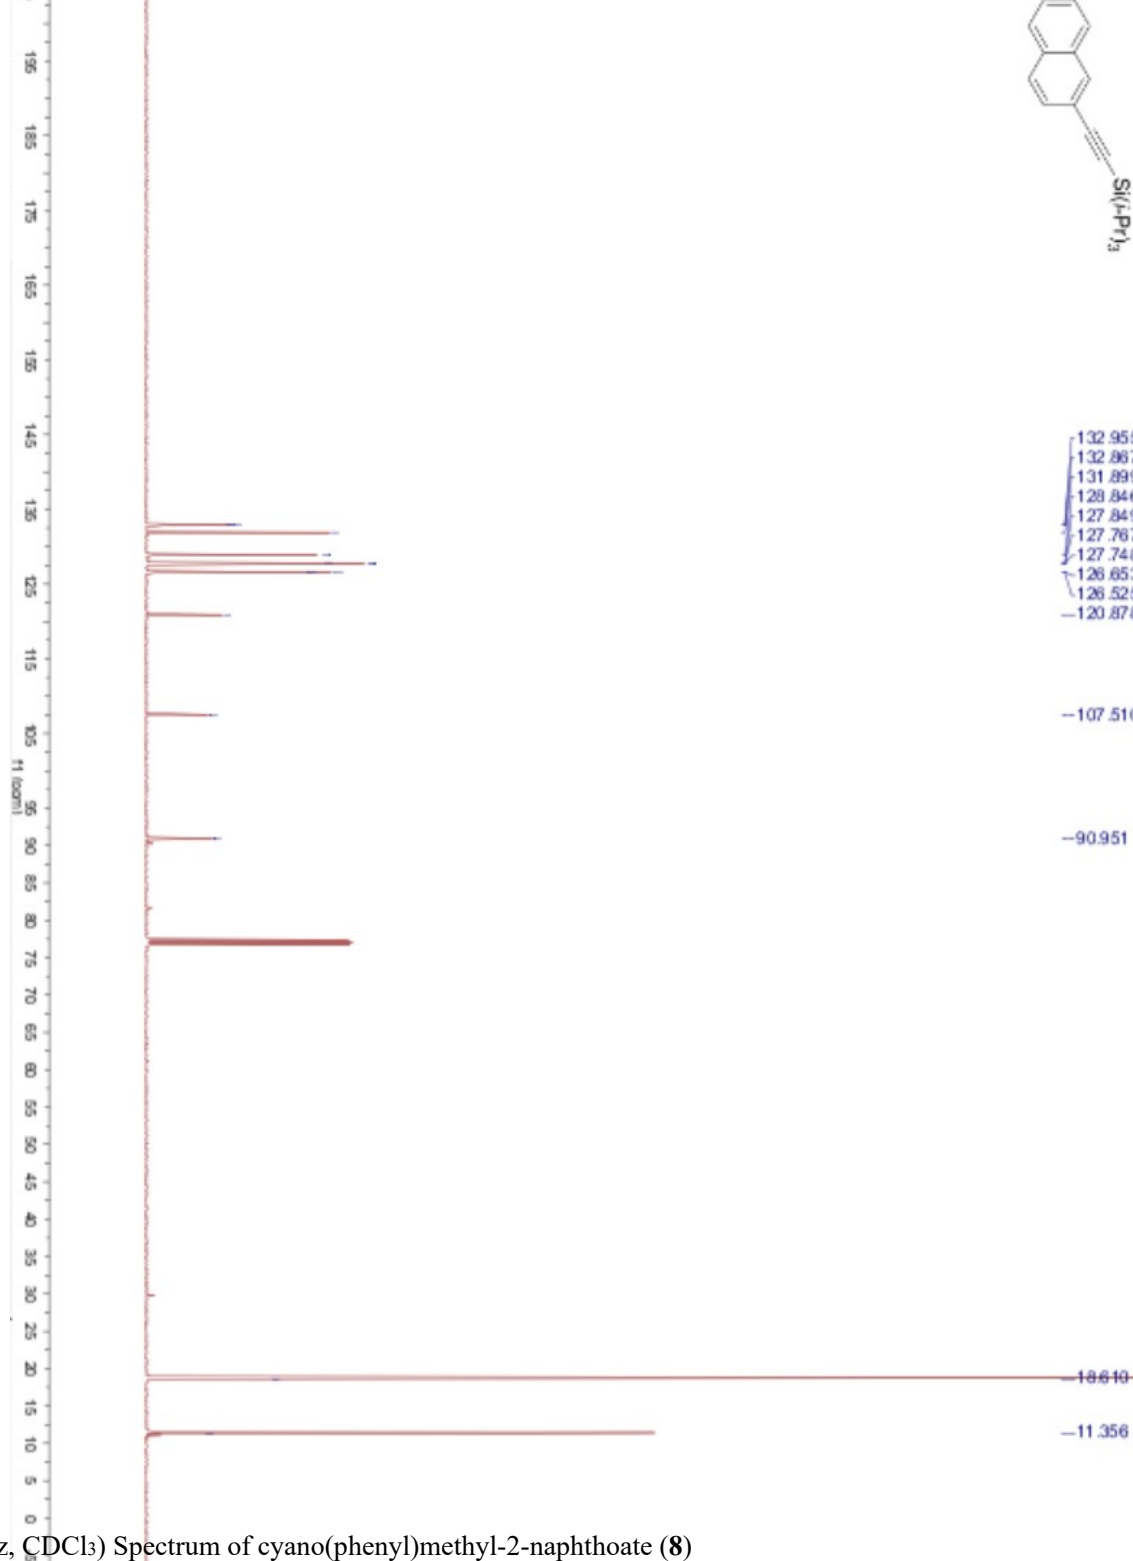

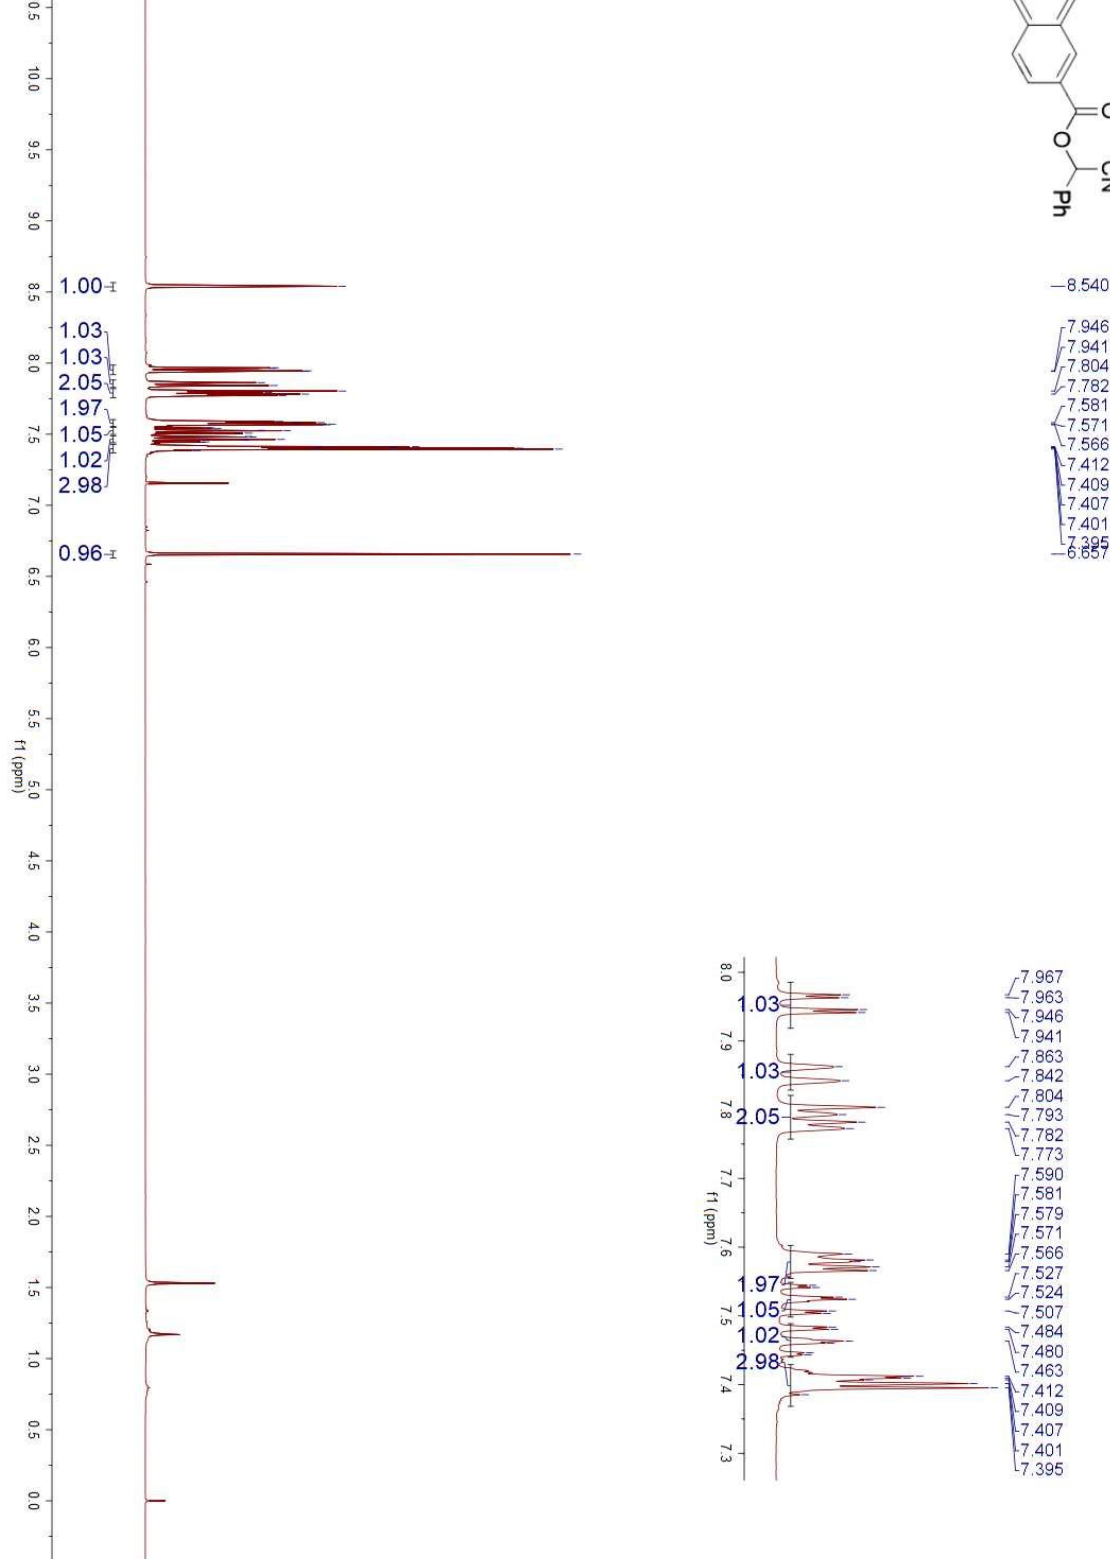

<sup>13</sup>C NMR (101 MHz, CDCl<sub>3</sub>) Spectrum of cyano(phenyl)methyl-2-naphthoate (**8**)

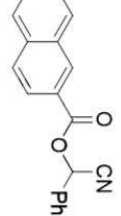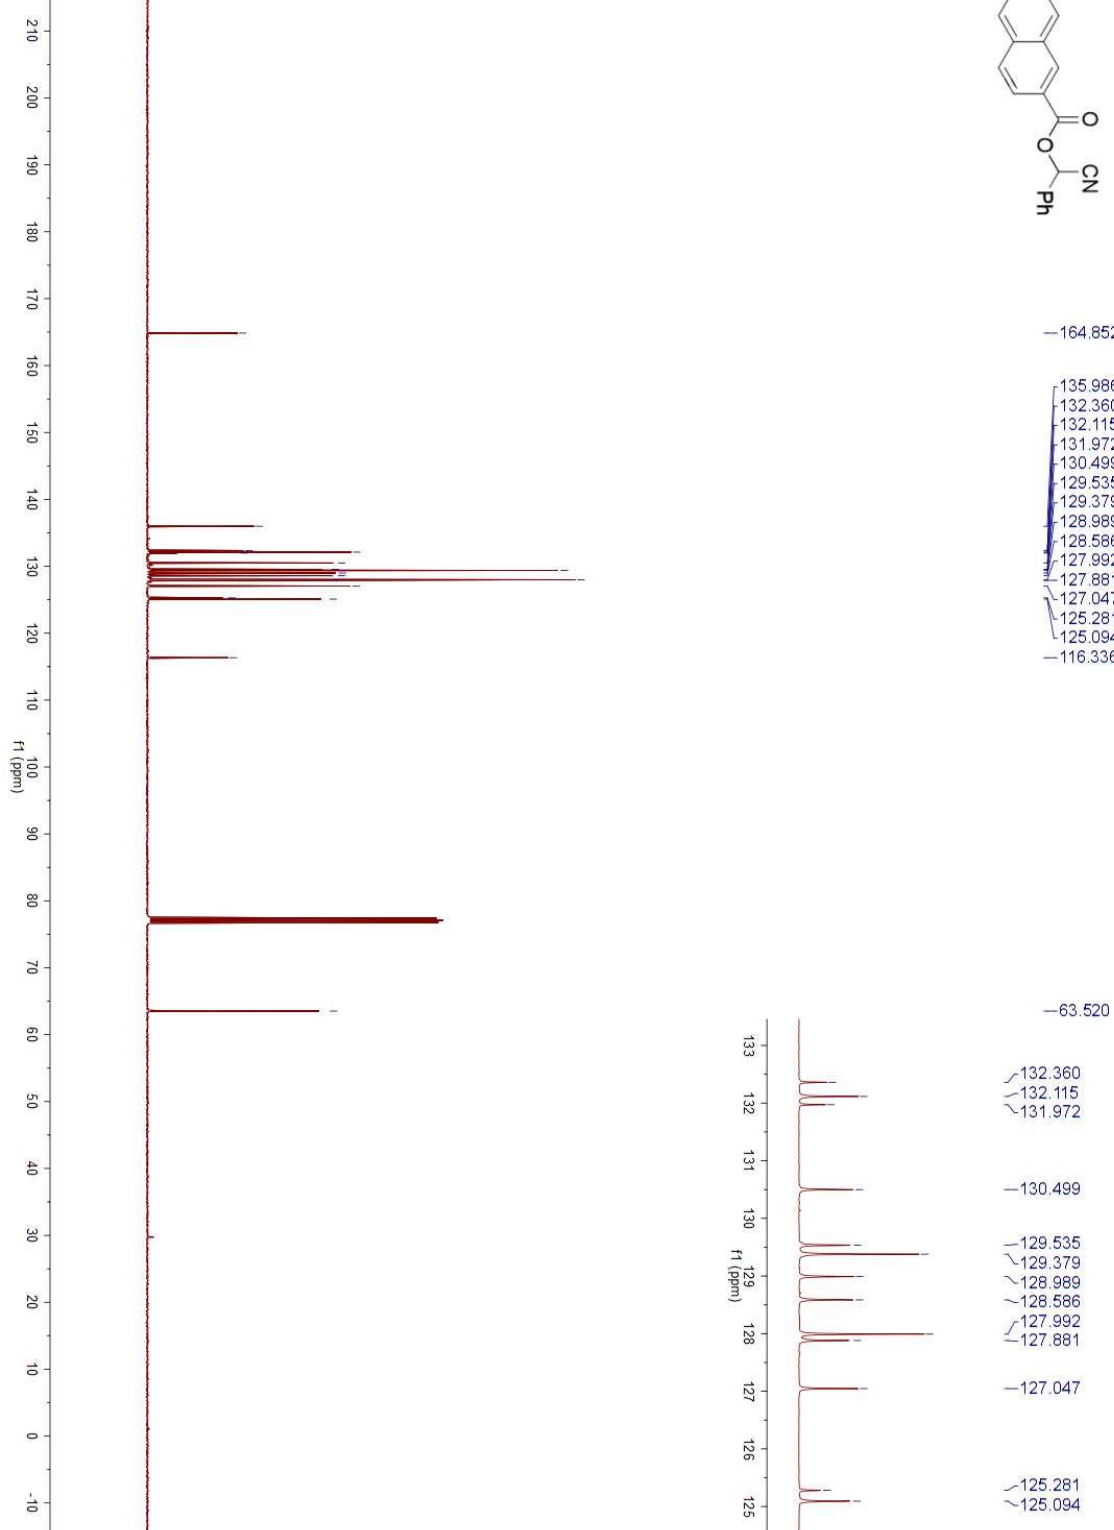

## 6. Copies of Infrared spectrum of the Products

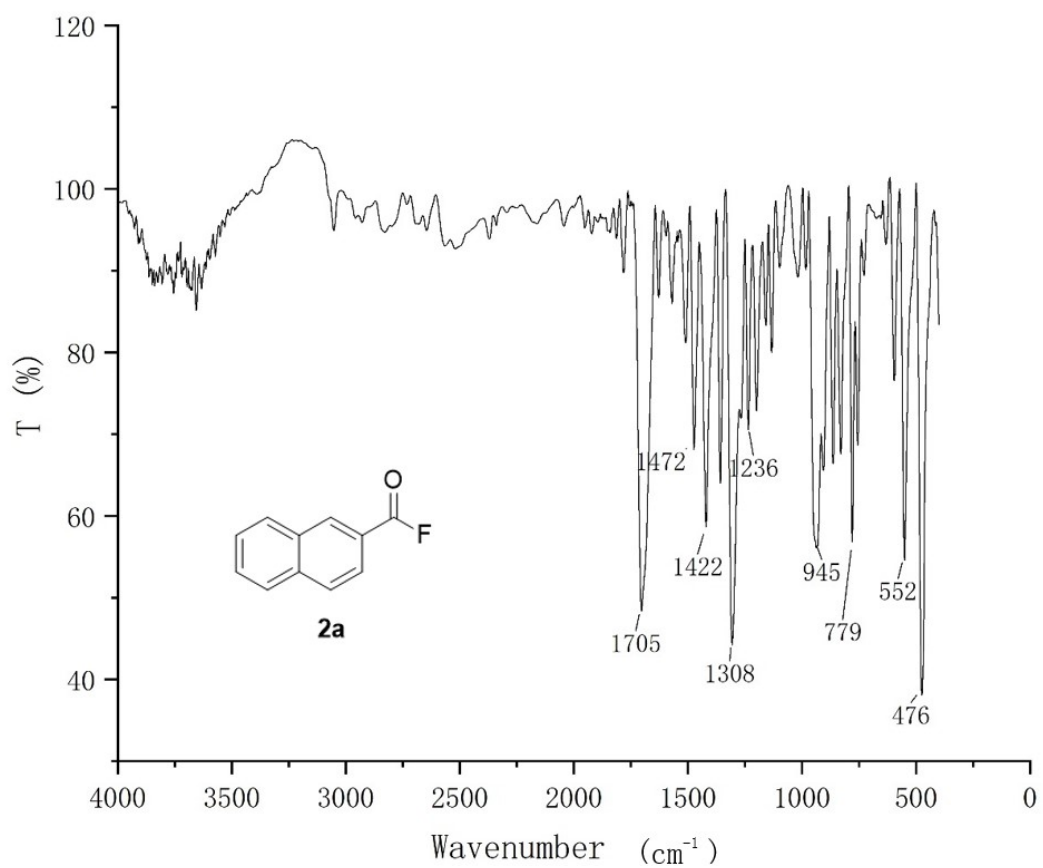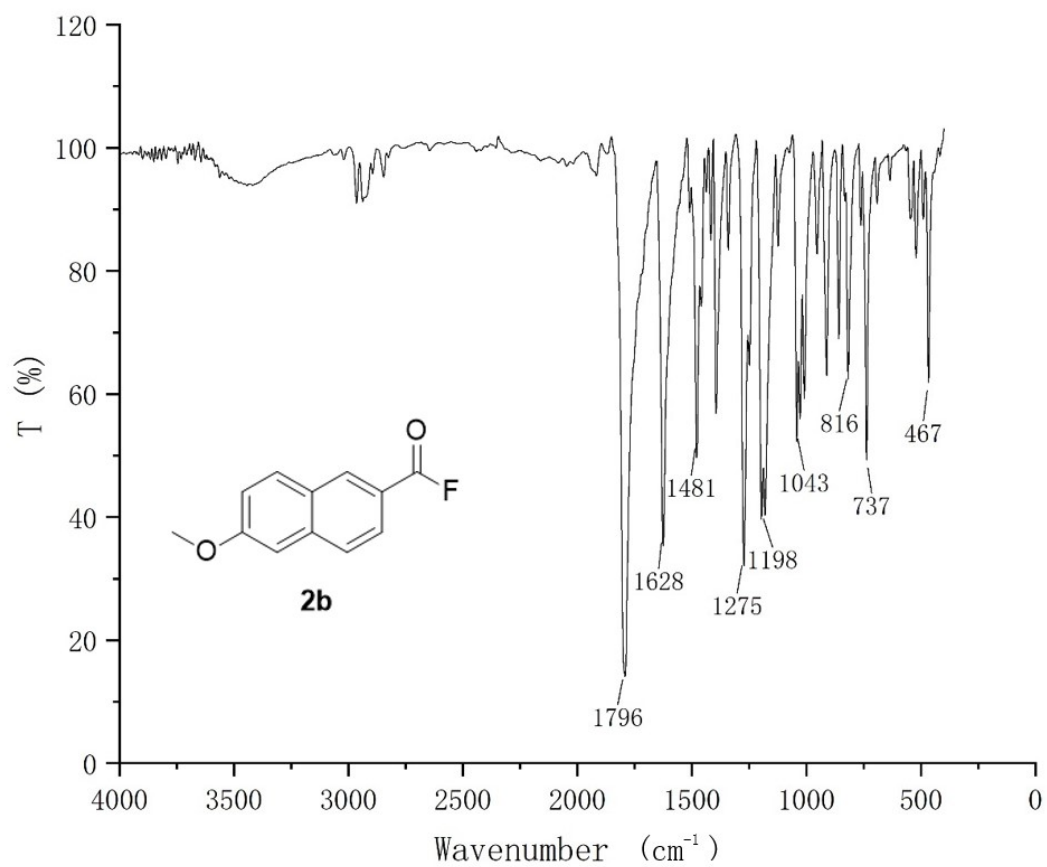



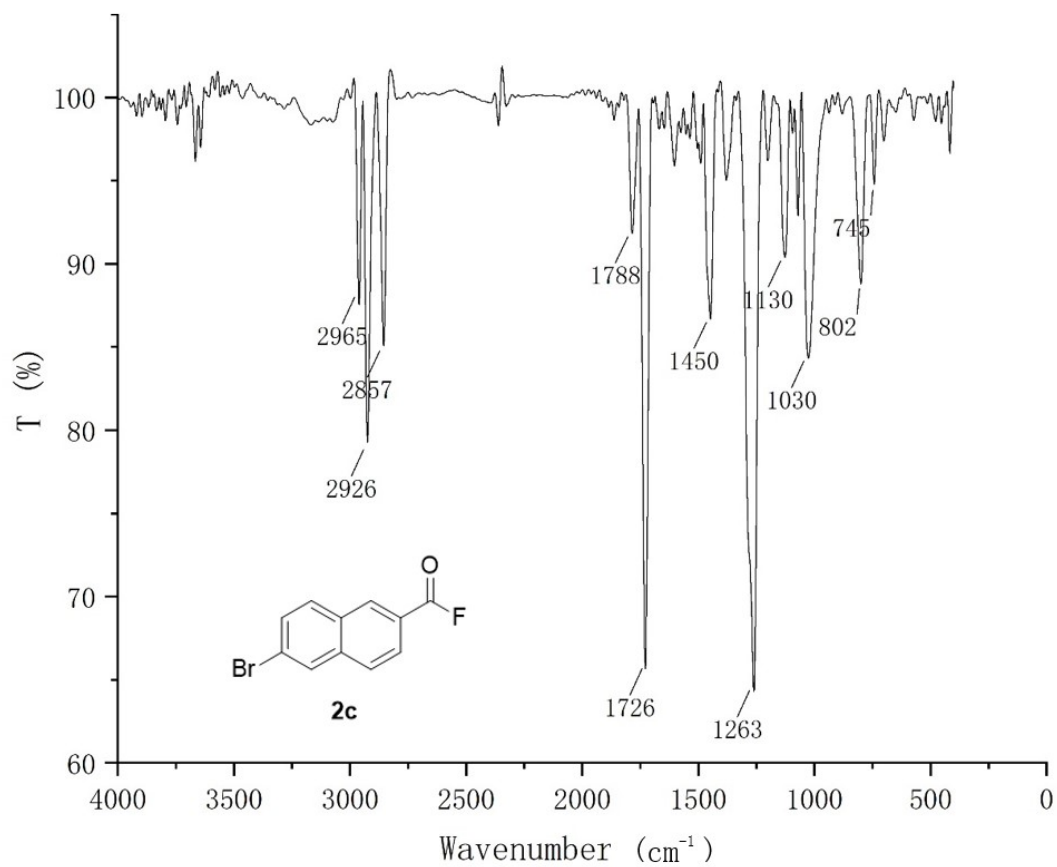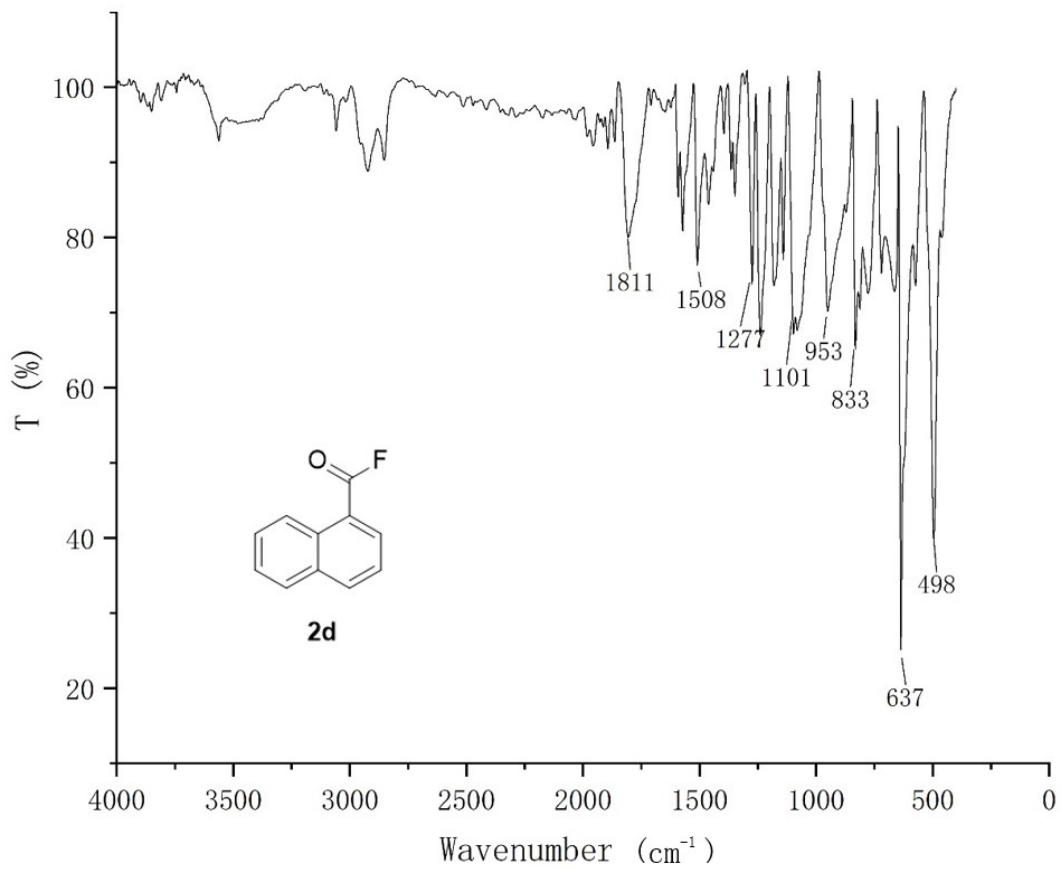

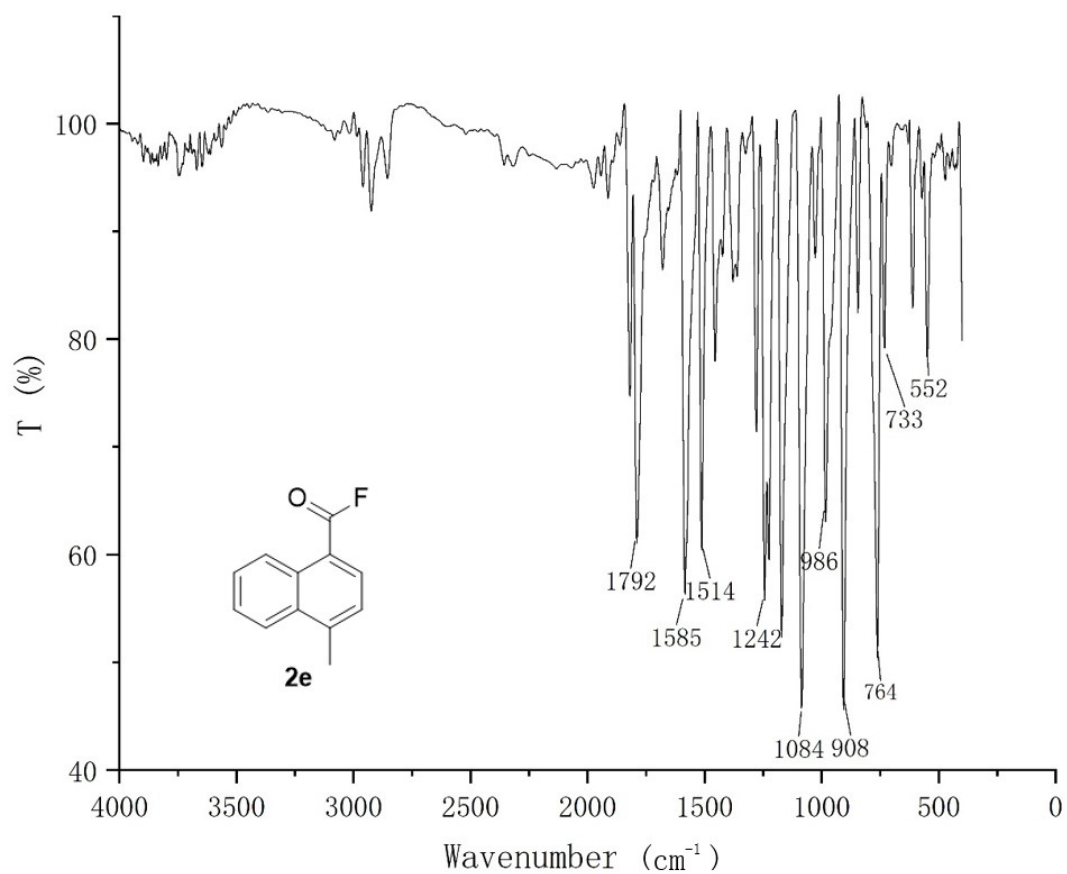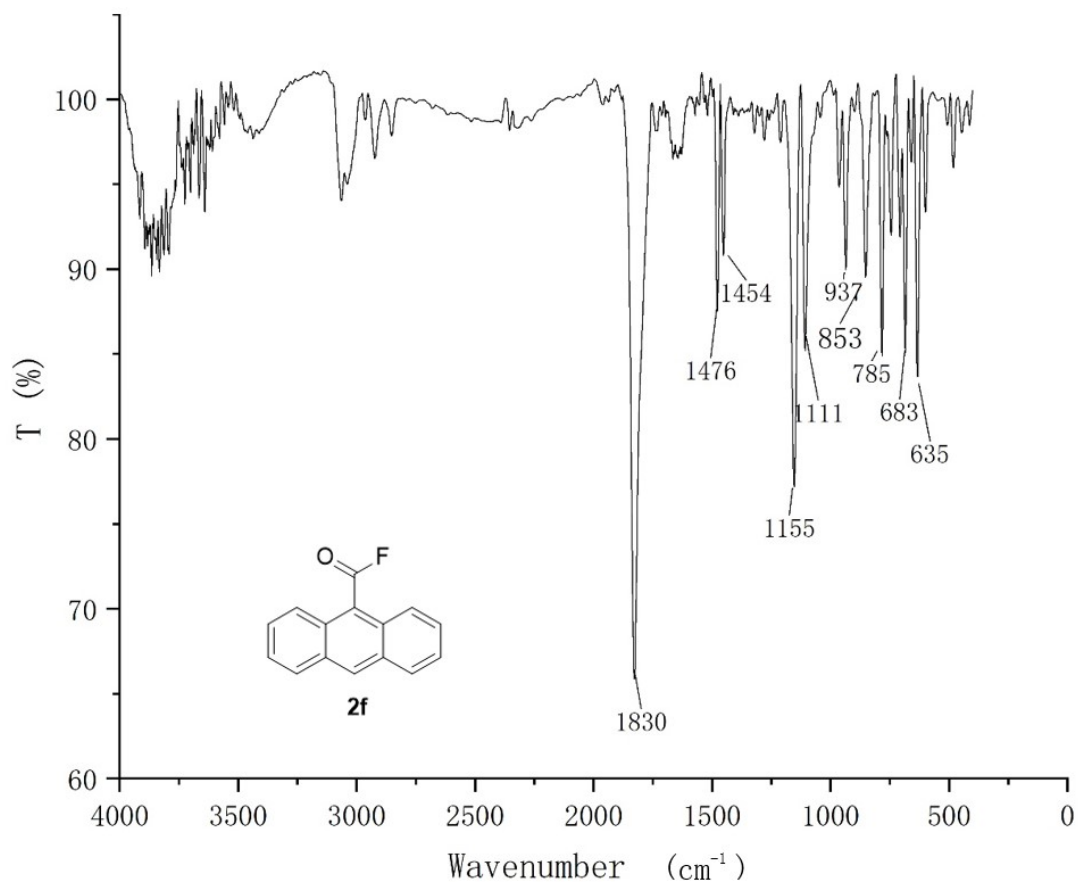

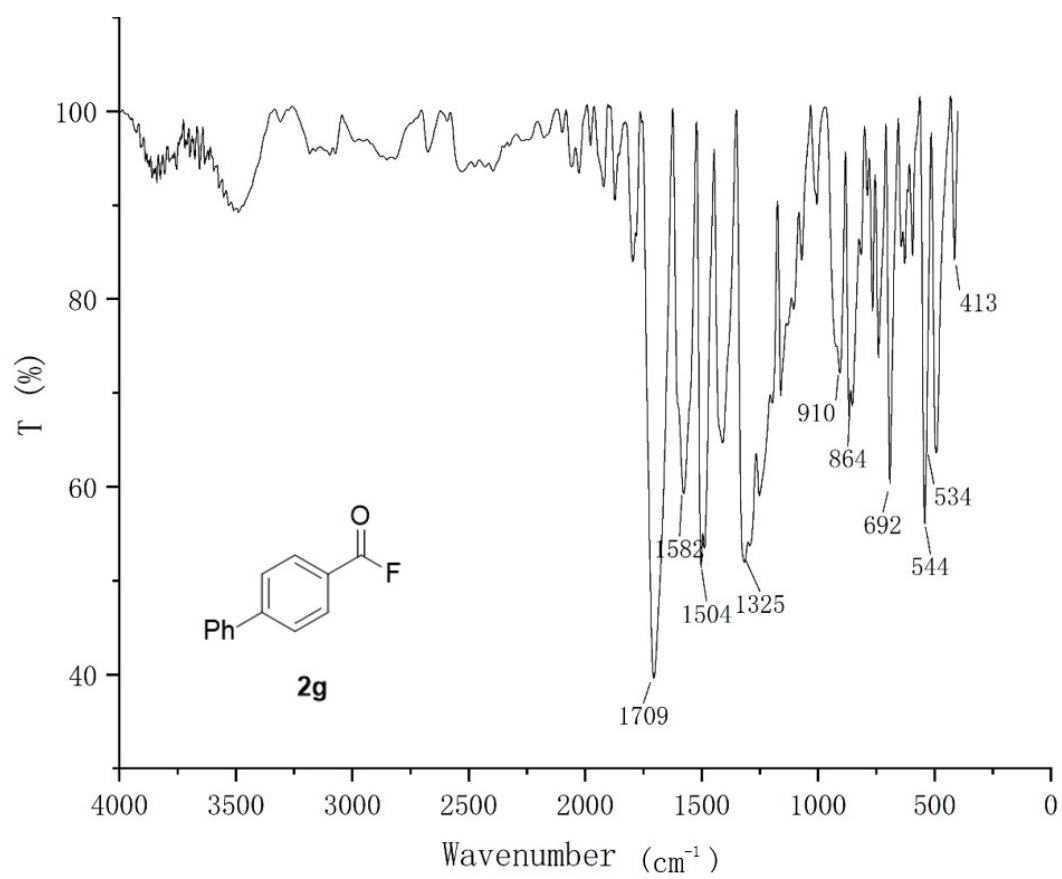

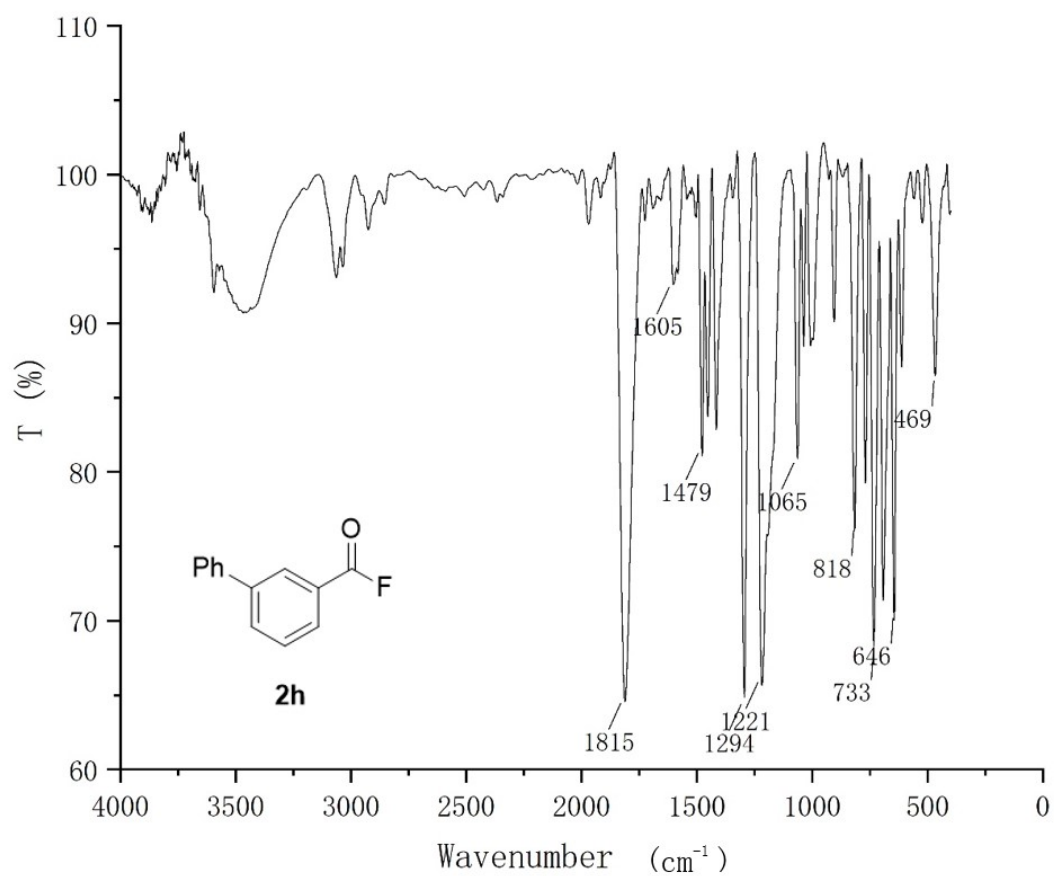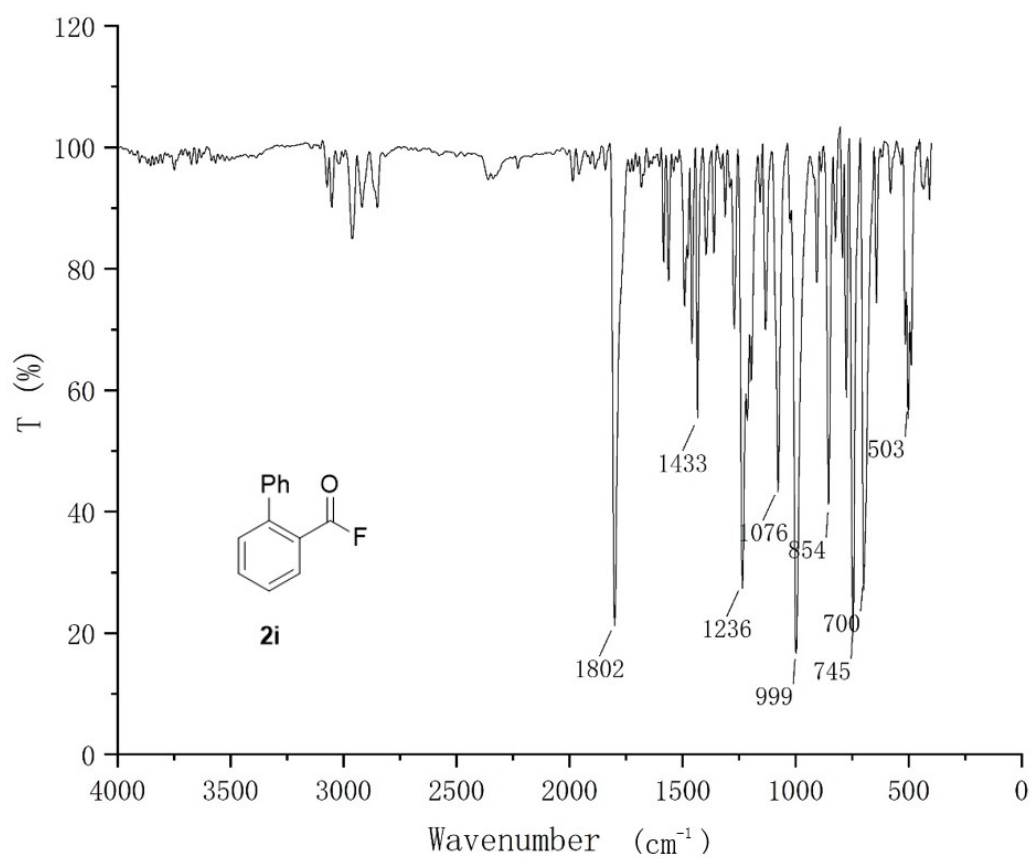

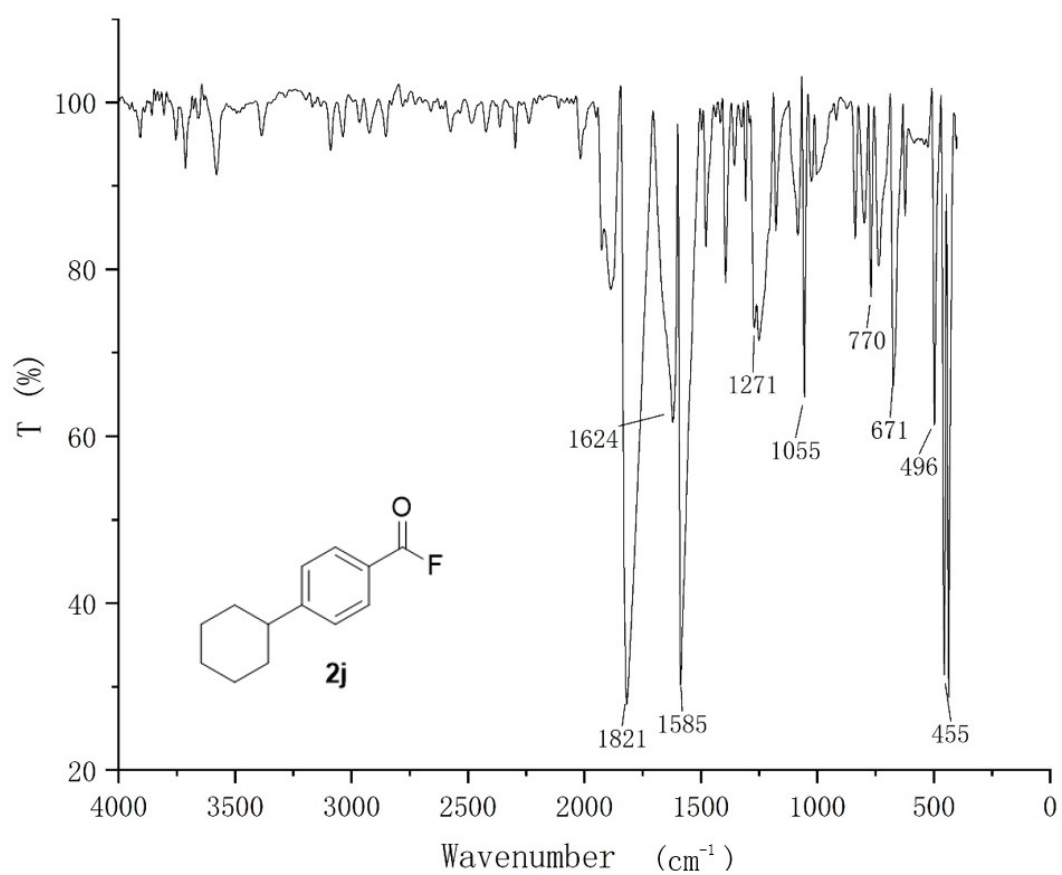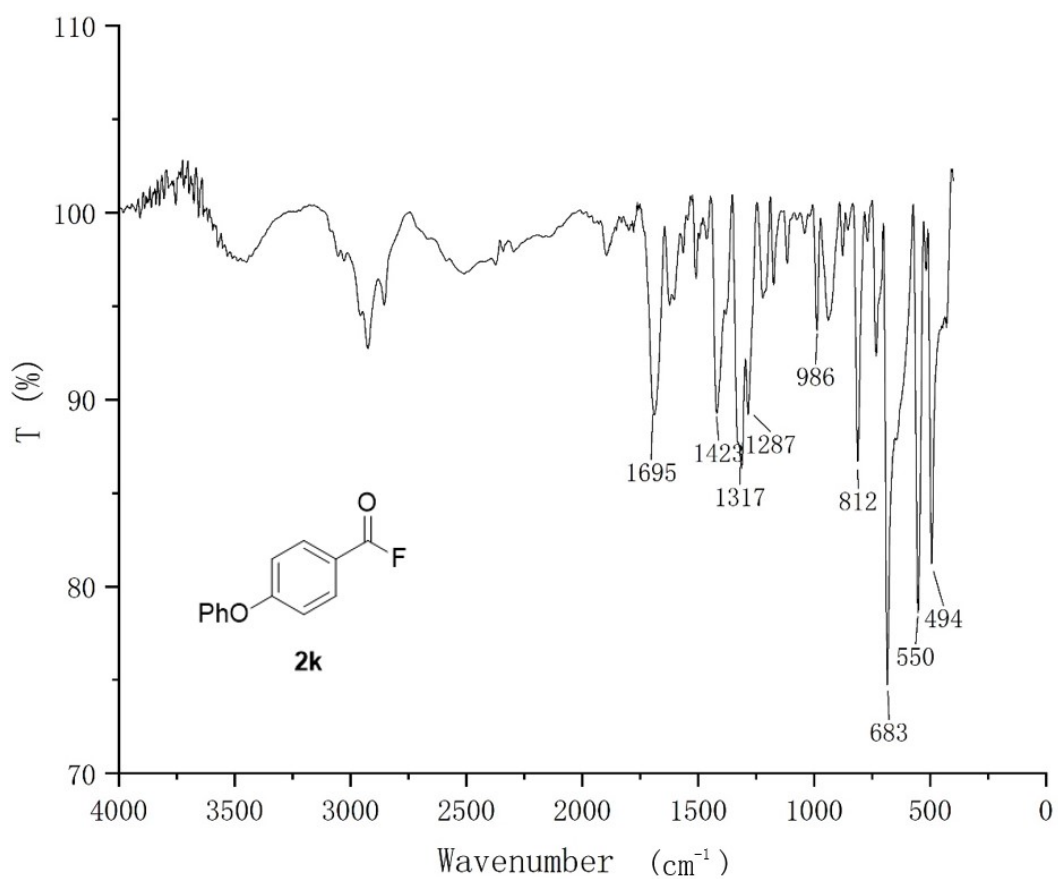

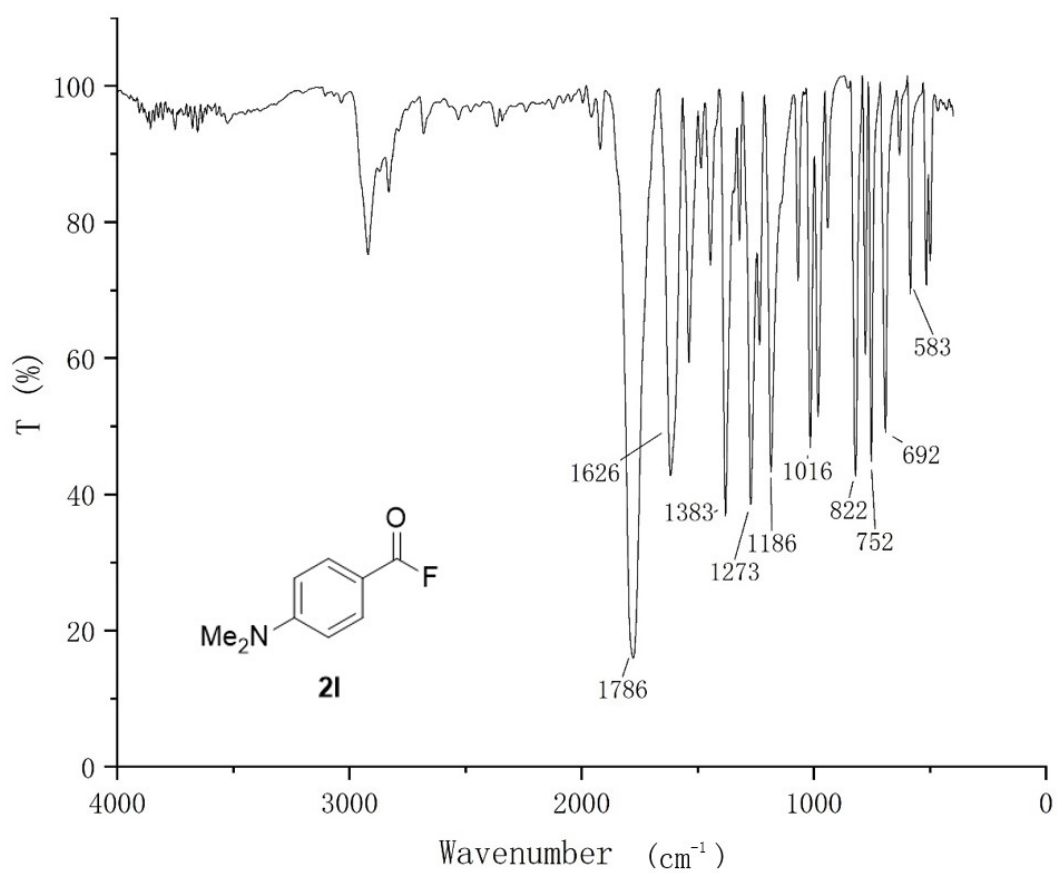

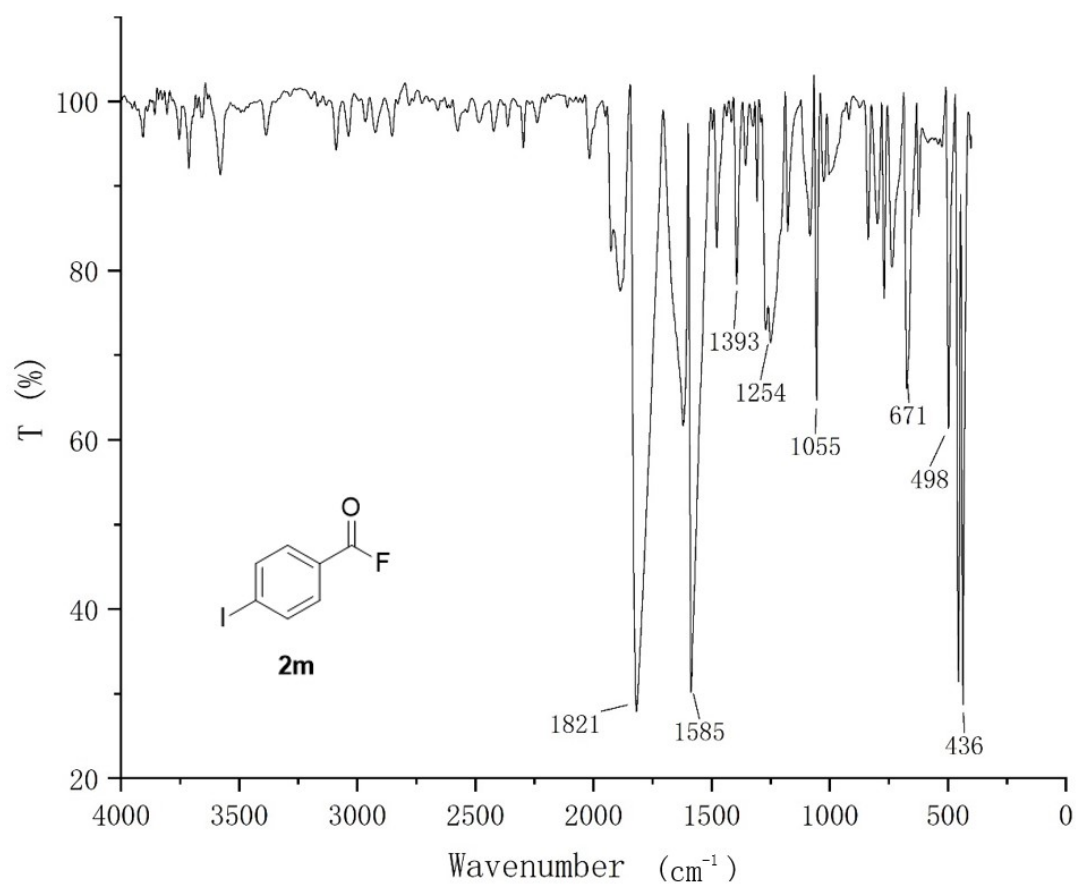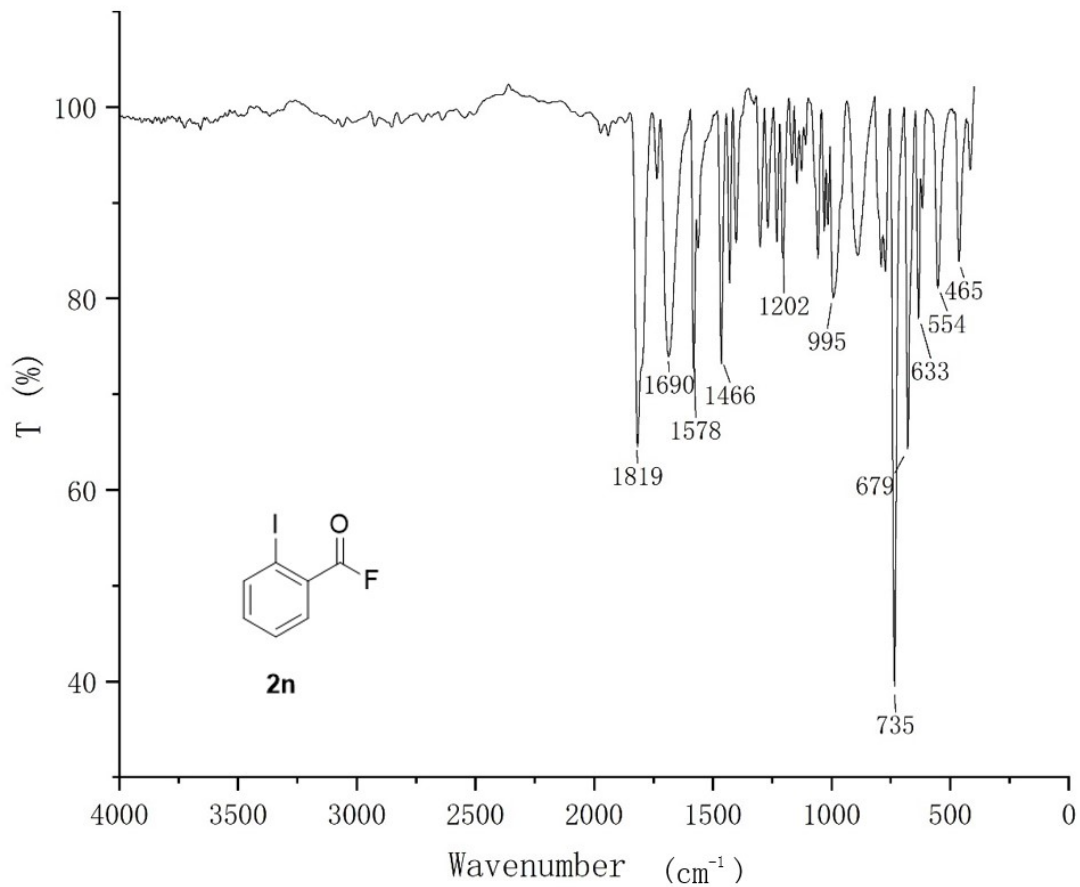

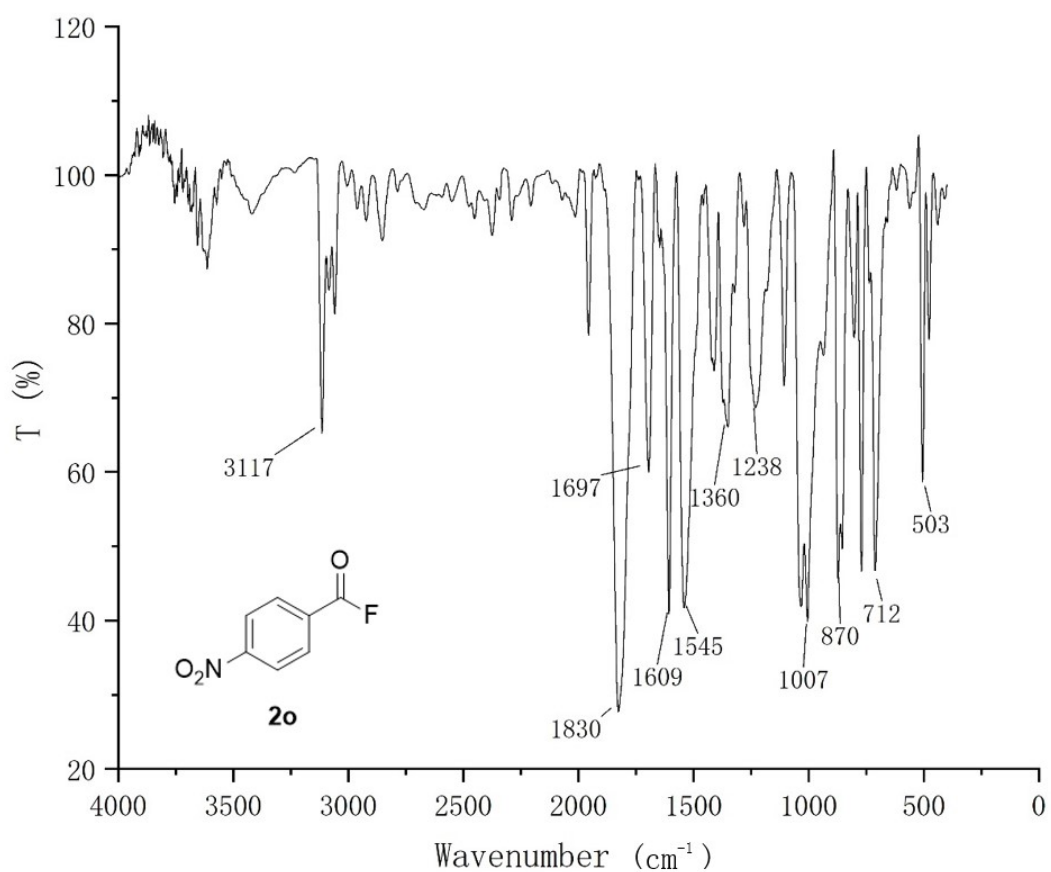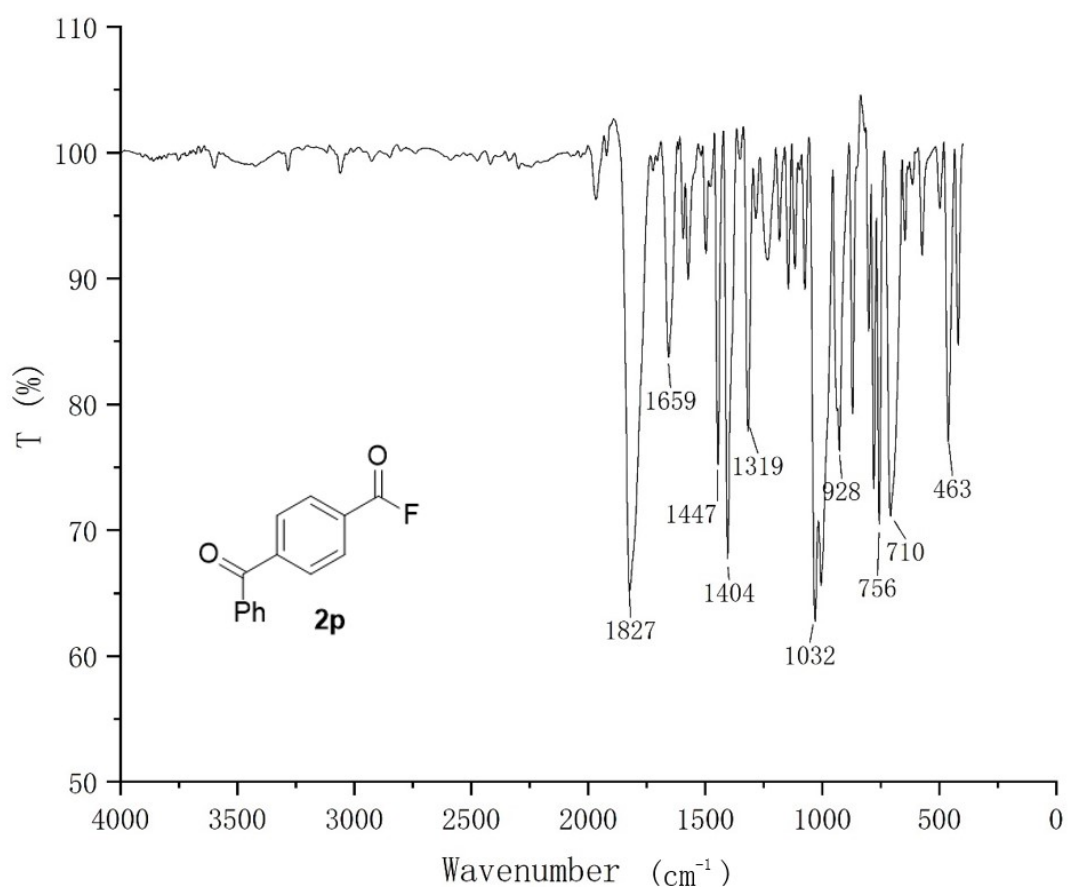



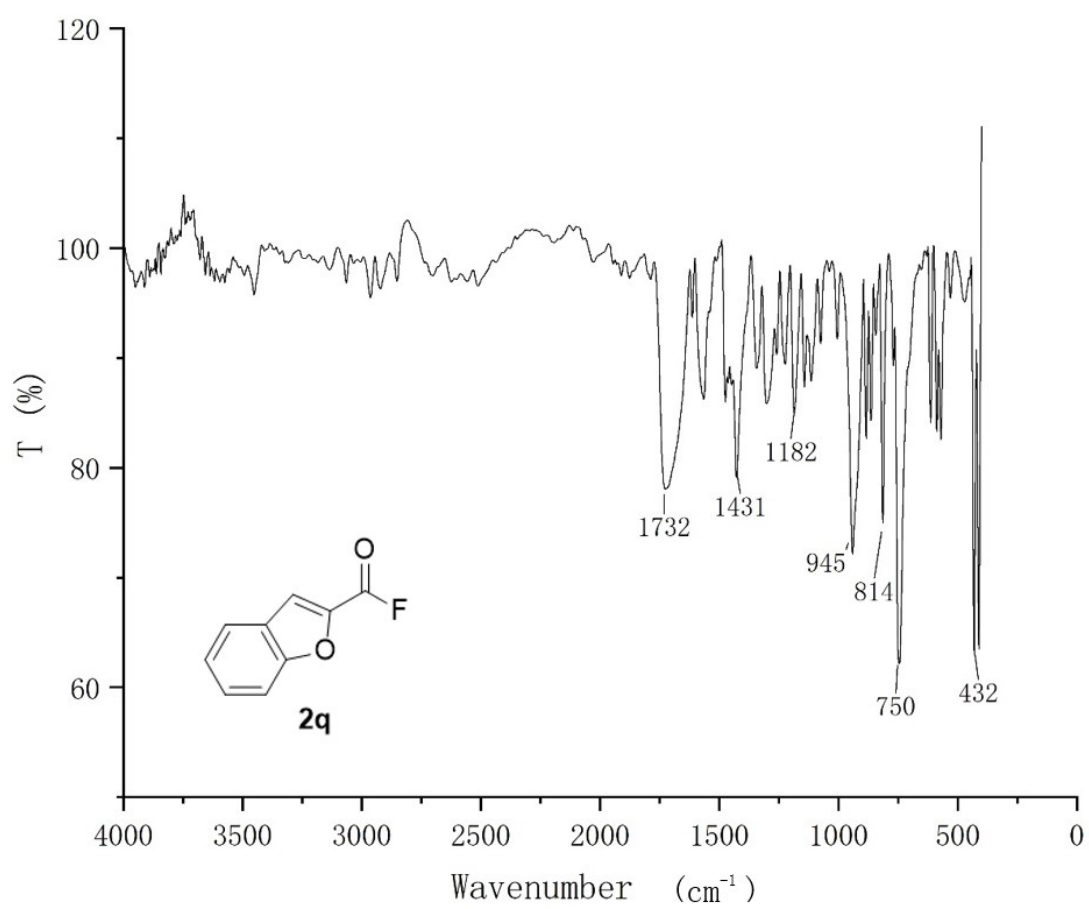

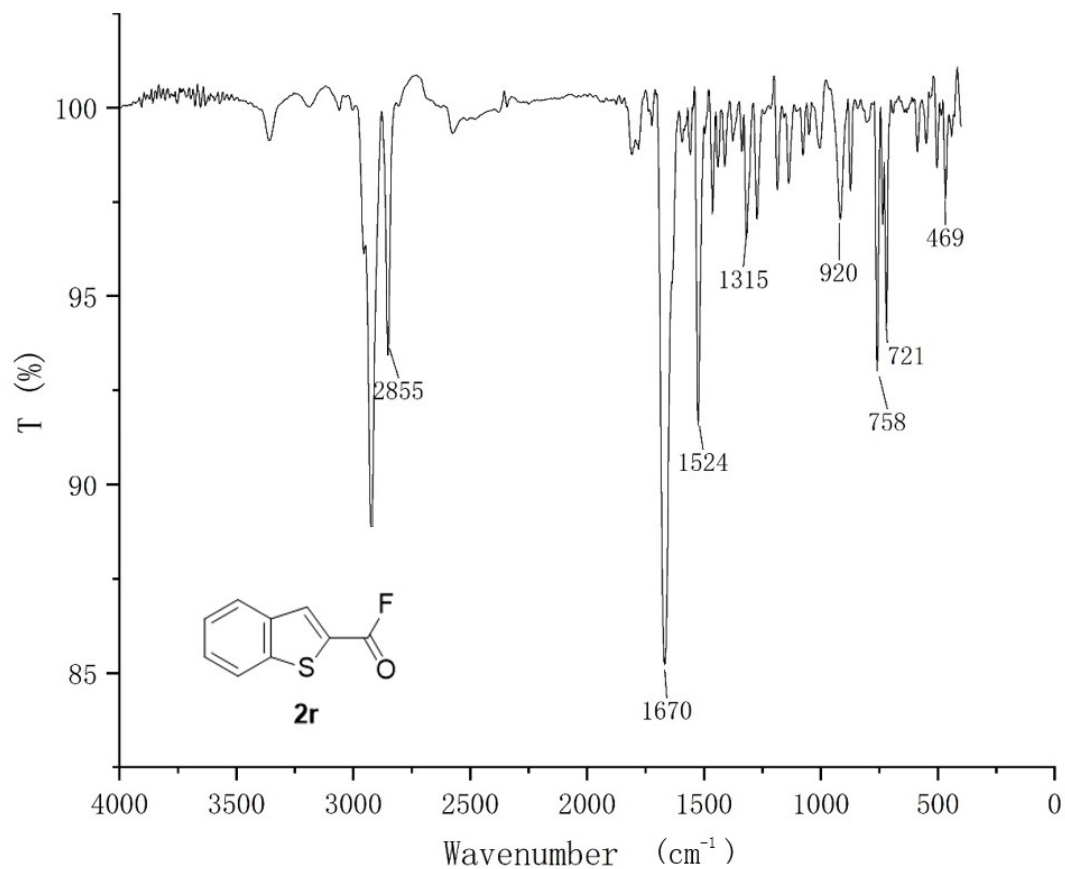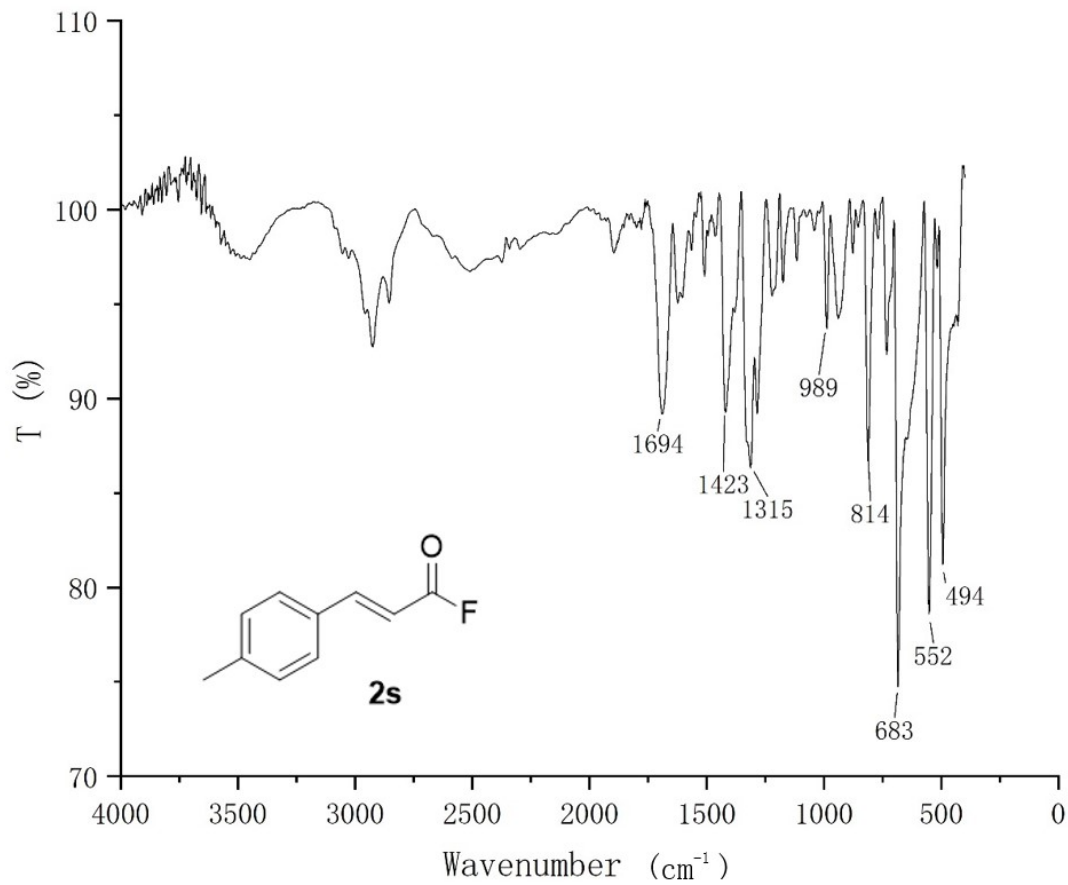

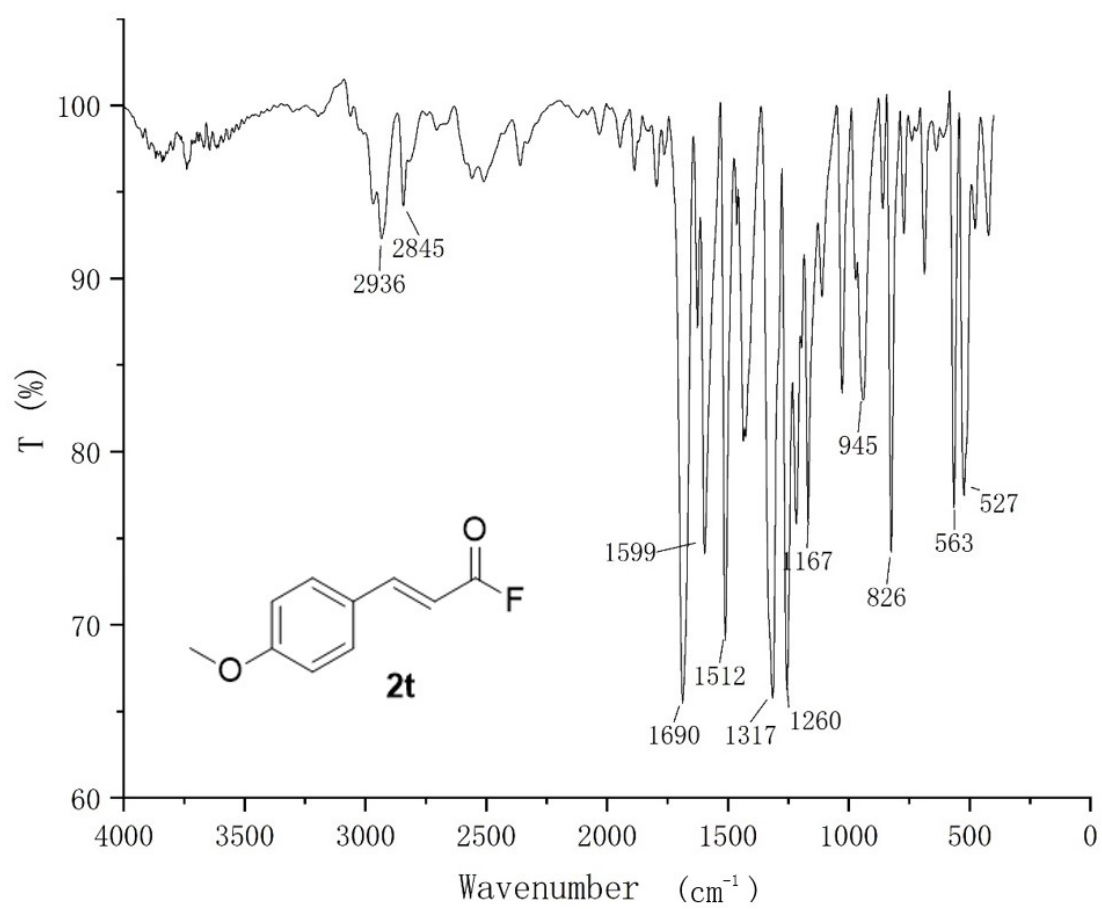

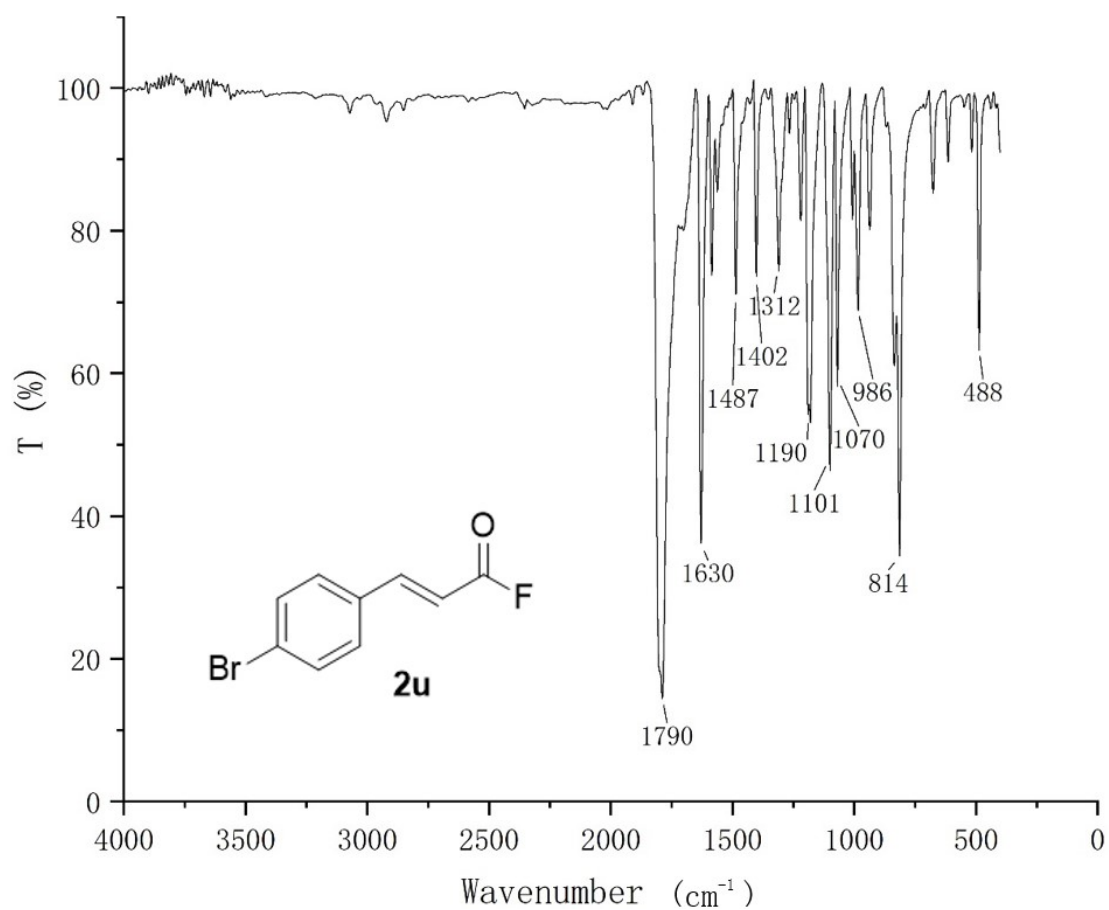

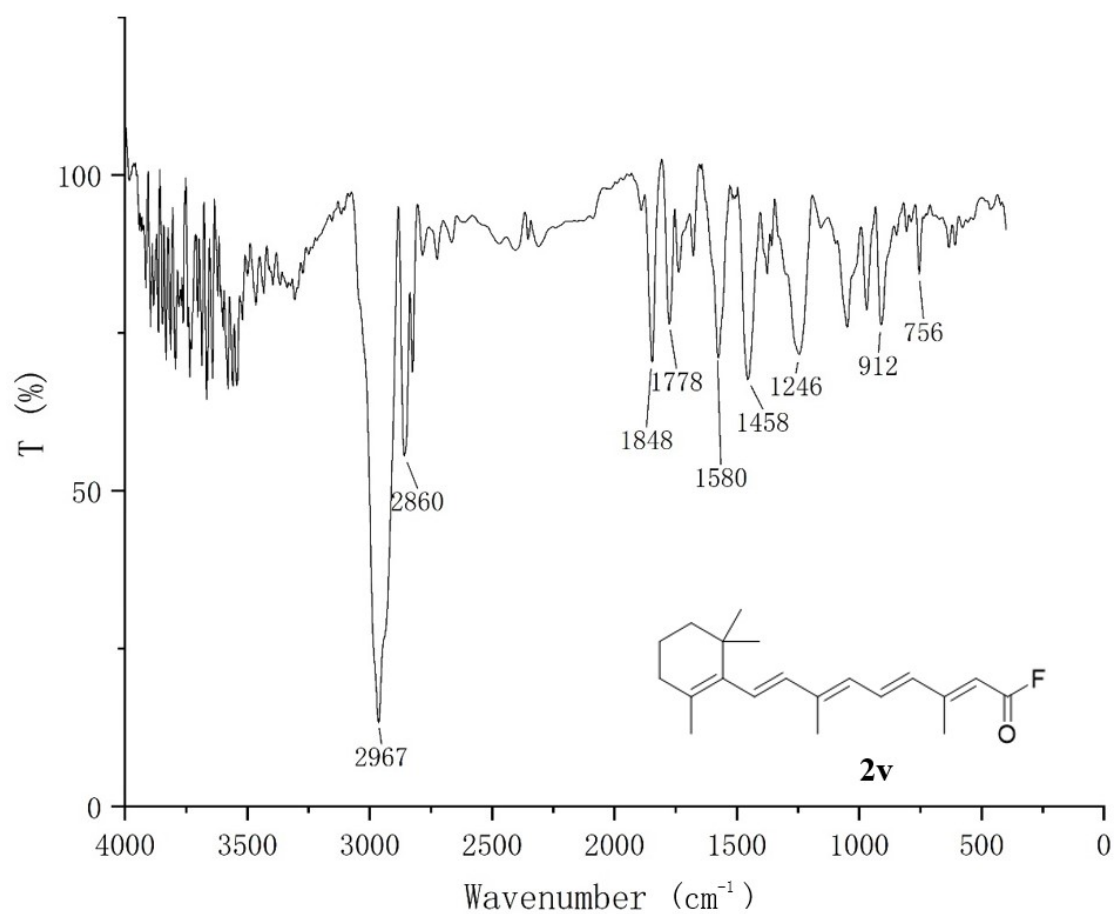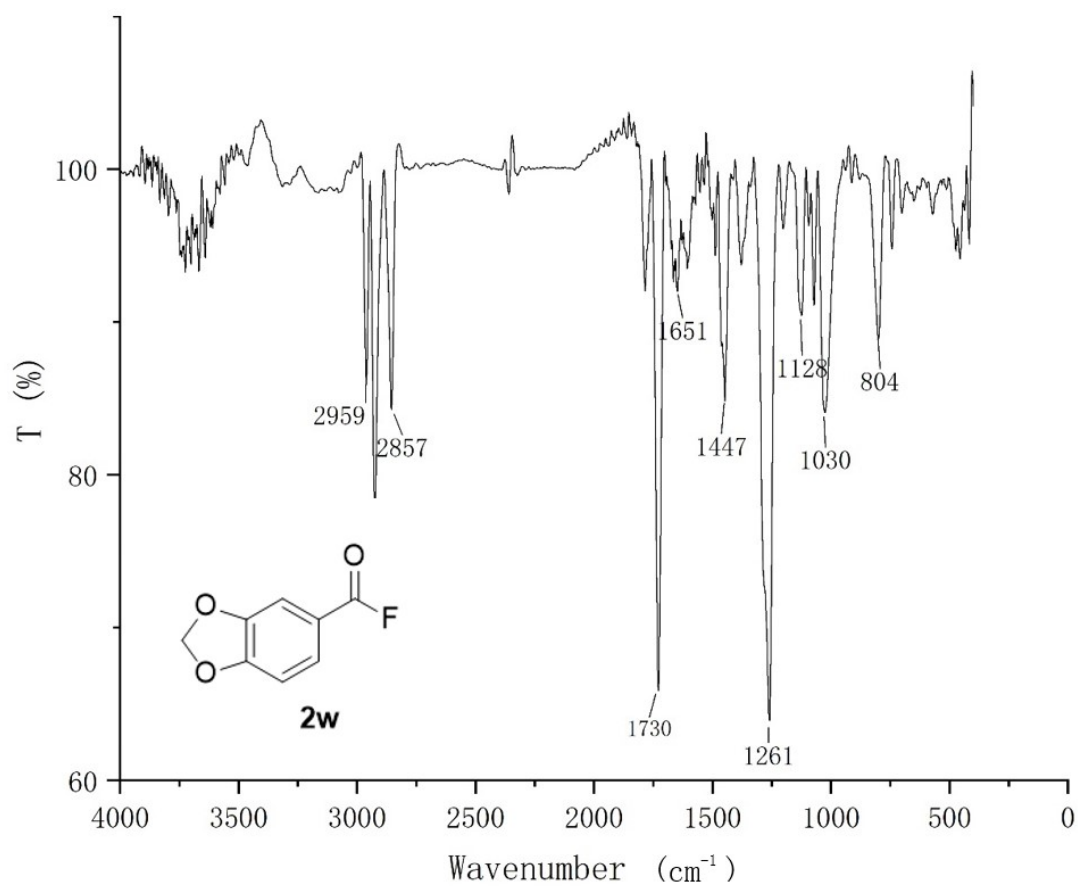

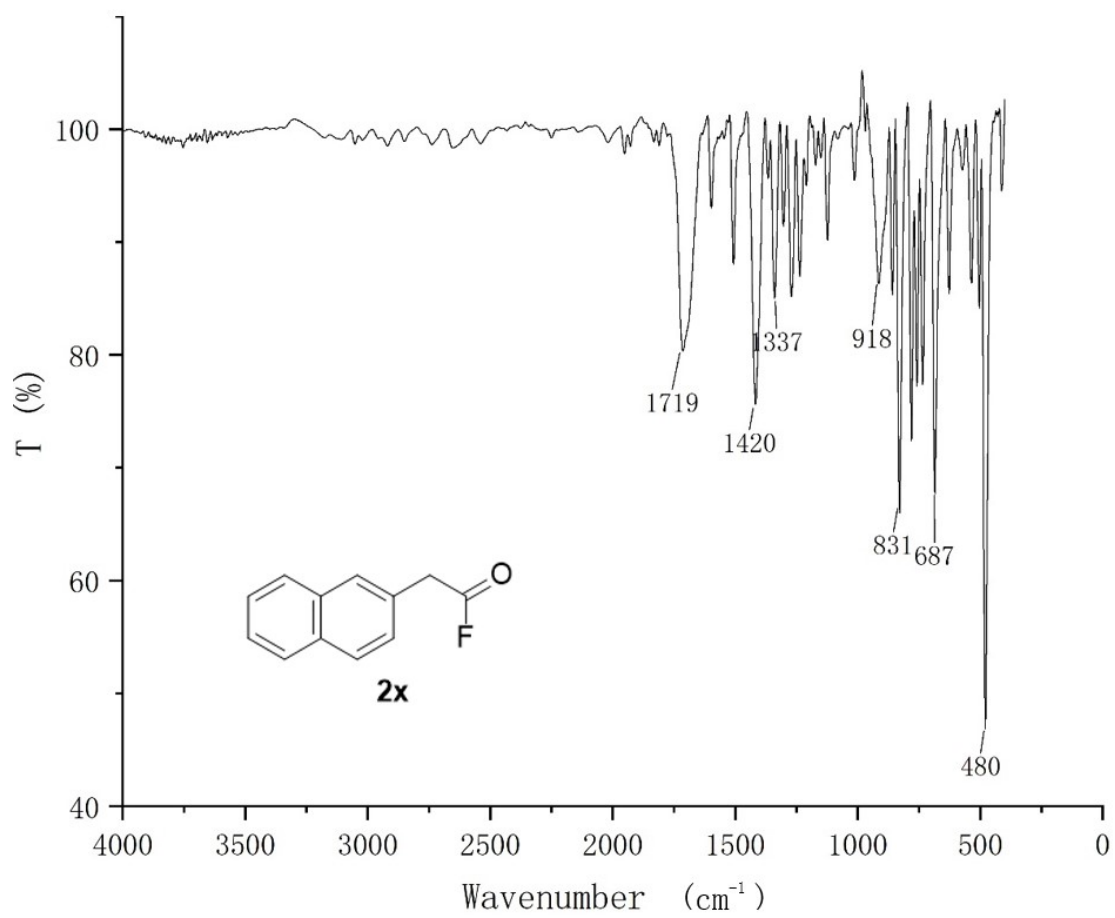

Supplement: d3ob01557b1.pdf [file d3ob01557b1.pdf]
